# Supplementary material
Source: PubMed Central journal article supplement (PMC5694946)
Supplement: EMBJ-36-487-s001.pdf [file EMBJ-36-487-s001.pdf]

## APPENDIX (Blank et al)

## TABLE OF CONTENTS

| ITEM                                                                                                                                                                                                                                                                                                                                                                                                                                                                                                                                                                                                                                                                                                                          | Pages |
|-------------------------------------------------------------------------------------------------------------------------------------------------------------------------------------------------------------------------------------------------------------------------------------------------------------------------------------------------------------------------------------------------------------------------------------------------------------------------------------------------------------------------------------------------------------------------------------------------------------------------------------------------------------------------------------------------------------------------------|-------|
| <b>Appendix Table 1.</b> Oligonucleotides                                                                                                                                                                                                                                                                                                                                                                                                                                                                                                                                                                                                                                                                                     | 2-3   |
| <b>Appendix Table 2.</b> <i>S. cerevisiae</i> strains                                                                                                                                                                                                                                                                                                                                                                                                                                                                                                                                                                                                                                                                         | 4     |
| <b>Appendix Table 3.</b> 5'- and 3'ends of mRNAs under periodic translational control in the cell cycle                                                                                                                                                                                                                                                                                                                                                                                                                                                                                                                                                                                                                       | 5-7   |
| <b>Appendix Figure 1.</b> Acc1p-TAP levels drop as cells exit mitosis and re-enter a new cell cycle                                                                                                                                                                                                                                                                                                                                                                                                                                                                                                                                                                                                                           | 8     |
| <b>Appendix Figure 2.</b> The <i>ACC1</i> uORF is conserved in the indicated genomic regions of <i>sensu stricto Saccharomyces</i> species                                                                                                                                                                                                                                                                                                                                                                                                                                                                                                                                                                                    | 9     |
| <b>Appendix Figure 3.</b> Ribosome occupancy of the <i>ACC1</i> uORF in the cell cycle                                                                                                                                                                                                                                                                                                                                                                                                                                                                                                                                                                                                                                        | 10    |
| <b>Appendix File 1.</b> Composite file of all sequencing data for the 17 mRNAs under periodic translational control. This file contains the following information: 1) File names of the 48 libraries analyzed in this study. 2) The Coverage of the Ribosome Profile (RP) and Transcriptional Profile (TP--RNAseq) reads detected mapping to the annotated CDS of each mRNAs in question and for each cell size point analyzed. 3) The combined length distribution of the Ribosome Profile footprints (RP-footprints) we observed in the CDS corresponding to each locus in question. In every case we included a similar analysis of the original ribosome profiling data from Ingolia (Ingolia et al., 2009), as controls. | 11-47 |

**Appendix Table 1. Oligonucleotides**

| NAME              | SEQUENCE                                                                                                                     | USE                             |
|-------------------|------------------------------------------------------------------------------------------------------------------------------|---------------------------------|
| miRNA linker      | /5rApp/CTGTAGGCACCATCAAT/3ddC/                                                                                               | Ribosome footprint<br>libraries |
| RT primer-RiboSeq | /5Phos/AGATCGGAAGAGCGTCGTGTAGGGAAAGAGTGTA<br>GATCTCGGTGGTCGC/iSp18/CACTCA/iSp18/TTCAGACGTG<br>TGCTCTCCGATCTATTGATGGTGCCTACAG | Ribosome footprint<br>libraries |
| rRNAsub-1         | /5BiotinTEG/CAGGATCGGTCGATTGTGCACCTCTT                                                                                       | rRNA depletion                  |
| rRNAsub-2         | /5BiotinTEG/CCGCTTCATTGAATAAGTAAAGAACTA                                                                                      | rRNA depletion                  |
| rRNAsub-3         | /5BiotinTEG/GACGCCTTATTCGTATCCATCTATATT                                                                                      | rRNA depletion                  |
| FWD-library-PCR   | AATGATACGGCGACCACCGAGATCTACAC                                                                                                | Ribosome footprint<br>libraries |
| INDEXED-1-REV     | CAAGCAGAAGACGGCATAACGAGATAGTCGTGTGACTGGAGT<br>TCAGACGTGTGCTCTTCCG                                                            | Ribosome footprint<br>libraries |
| INDEXED-2-REV     | CAAGCAGAAGACGGCATAACGAGATACTGATGTGACTGGAGT<br>TCAGACGTGTGCTCTTCCG                                                            | Ribosome footprint<br>libraries |
| INDEXED-3-REV     | CAAGCAGAAGACGGCATAACGAGATATGCTGGTACTGGAGT<br>TCAGACGTGTGCTCTTCCG                                                             | Ribosome footprint<br>libraries |
| INDEXED-4-REV     | CAAGCAGAAGACGGCATAACGAGATACGTCGGTACTGGAGT<br>TCAGACGTGTGCTCTTCCG                                                             | Ribosome footprint<br>libraries |
| INDEXED-5-REV     | CAAGCAGAAGACGGCATAACGAGATAGCTGCGTACTGGAGT<br>TCAGACGTGTGCTCTTCCG                                                             | Ribosome footprint<br>libraries |
| INDEXED-6-REV     | CAAGCAGAAGACGGCATAACGAGATATCGTAGTACTGGAGT                                                                                    | Ribosome footprint              |

|                        |                                                                                  |                                 |
|------------------------|----------------------------------------------------------------------------------|---------------------------------|
|                        | TCAGACGTGTGCTCTTCCG                                                              | libraries                       |
| INDEXED-7-REV          | CAAGCAGAAGACGGCATAACGAGATCGTCAGGTGACTGGAGT<br>TCAGACGTGTGCTCTTCCG                | Ribosome footprint<br>libraries |
| INDEXED-8-REV          | CAAGCAGAAGACGGCATAACGAGATCGTAGCGTGACTGGAGT<br>TCAGACGTGTGCTCTTCCG                | Ribosome footprint<br>libraries |
| XIV662193-F1           | GCCCCATATGCGTTGACGTTATCCAAAGGGGAATGCTTCATC<br>TTGTTGAACGGATCCCCGGGTTAATTAA       | Strain construction             |
| XIV662093-R1           | GATTTTAAACGGGCGCAACGATTCGGTGGGCAGTGGAATTG<br>TTGGGCGTTGAATTCGAGCTCGTTTAAAC       | Strain construction             |
| XIV662374-FWD          | GCGCATGCATCGACGTCAC                                                              | Strain construction             |
| XIV661899-FWD          | CGGTTCTACAATTGTTCTGCT                                                            | Strain construction             |
| XIV661552-REV          | GTGGAGAAGAAAAGGGAAG                                                              | Strain construction             |
| ACC1-(TG-340A)-<br>REV | GGGCAGAGGGAAAAGTTCGTATAGTAGAATGAATAAACTTT<br>TATAAACATTTGCACCGATCACTCACAGAG      | Strain construction             |
| ACC1-CTAP-FWD          | CTGAAGTTATCAAGATGTTATCTACCGATGATAAAGAAAAT<br>TGTTGAAGACTTTGAAATCCATGGAAAAGAGAAG  | Strain construction             |
| ACC1-CTAP-REV          | TTATATTAGCAACTAAATTAATTACATCAATACTATTTTTTTT<br>TTTTACTTTACAAGGTTACGACTCACTATAGGG | Strain construction             |
| ACC1(+2)-FWD           | TGAGCGAAGAAAGCTTATTCG                                                            | RNA surveillance                |
| ACC1(+495)-REV         | CTGGGACAATTTTTAGGCA                                                              | RNA surveillance                |
| PGK1-FWD               | AACGGTGAAAGAAACGAAAAA                                                            | RNA surveillance                |
| PGK1-REV               | TCCAAAACCTTCTGAAGGTG                                                             | RNA surveillance                |

Appendix Table 2. *S. cerevisiae* strains

| NAME                  | GENOTYPE                                                                               | SOURCE                    | FIGURE USED IN                                  |
|-----------------------|----------------------------------------------------------------------------------------|---------------------------|-------------------------------------------------|
| BY4743                | <i>MATa/α, his3Δ1/his3Δ1, leu2Δ0/leu2Δ0, LYS2/lys2Δ0, met15Δ0/MET15, ura3Δ0/ura3Δ0</i> | Yeast Deletion<br>Project | 1; EV1;<br>Appendix<br>Figures 3-20             |
| BY4741                | <i>MATα, his3Δ1, leu2Δ0, ura3Δ0, met15Δ0</i>                                           | Yeast Deletion<br>Project | 7                                               |
| YL01                  | <i>ChrXIV:662143::kanMX6</i> (BY4741 otherwise)                                        | This study                | 6; 7                                            |
| SCMSP232              | <i>ChrXIV:662143::kanMX6, (TG-340→AA)-ACC1/+</i><br>(BY4743 otherwise)                 | This study                | N/A                                             |
| SCMSP233-C            | <i>ChrXIV:662143::kanMX6, (TG-340→AA)-ACC1</i><br>( <i>MATa</i> segregant of SCMSP232) | This study                | 6; 7                                            |
| SCMSP234              | <i>ACC1-TAP::URA3</i> (YL01 otherwise)                                                 | This study                | 4A; 5C,D; EV2A;<br>EV3; EV4;<br>Appendix Fig. 1 |
| SCMSP236              | <i>ACC1-TAP::URA3</i> (SCMSP233-C otherwise)                                           | This study                | 5B,C,D; EV2B;<br>EV3; EV4                       |
| YSC1178-<br>202232118 | <i>FAS1-TAP::HIS3</i> (BY4741 otherwise)                                               | GE Healthcare             | 4B                                              |
| YSC1178-<br>202233787 | <i>FAS2-TAP::HIS3</i> (BY4741 otherwise)                                               | GE Healthcare             | 4C                                              |
| JD186                 | <i>sch9::HIS3</i> (BY4742 otherwise)                                                   | Kennedy lab<br>collection | 7                                               |

Appendix Table 3. 5'- and 3'ends of mRNAs under periodic translational control in the cell cycle<sup>a</sup>

| Standard Name | Systematic Name | Chromosome Identifier | Strand | CDS Start Position | CDS End Position | Transcript Start Position | Transcript End Position | 5'-leader length | 3'-leader length | Reference                                           | $\Delta G^b$ (5'leader+48) | %GC  |
|---------------|-----------------|-----------------------|--------|--------------------|------------------|---------------------------|-------------------------|------------------|------------------|-----------------------------------------------------|----------------------------|------|
| <i>ACC1</i>   | YNR016C         | chrXIV                | Crick  | 661374             | 654673           | 661909                    |                         | 535              |                  | (Kang, Lai et al., 2015)                            | -81.0                      | 40.0 |
| <i>DSK2</i>   | YMR276W         | chrXIII               | Watson | 818827             | 819948           | 818749                    | 820057                  | 78               | 109              | (Kang et al., 2015)                                 | -16.3                      | 26.7 |
| <i>DYN1</i>   | YKR054C         | chrXI                 | Crick  | 547925             | 535647           |                           |                         |                  |                  |                                                     |                            | 46.7 |
| <i>FAS1</i>   | YKL182W         | chrXI                 | Watson | 100671             | 106826           |                           |                         |                  |                  |                                                     |                            | 53.3 |
| <i>FAS2</i>   | YPL231W         | chrXVI                | Watson | 108652             | 114315           | 108613                    |                         | 39               |                  | (Kang et al., 2015)                                 | -14.5                      | 53.3 |
| <i>GAT2</i>   | YMR136W         | chrXIII               | Watson | 541199             | 542881           | 541101                    | 542967                  | 98               | 86               | (Pelechano, Wei et al., 2013)                       | -16.3                      | 53.3 |
| <i>GCV3</i>   | YAL044C         | chrI                  | Crick  | 58462              | 57950            | 58486                     | 57824                   | 24               | 126              | (Kang et al., 2015)                                 | -6.2                       | 40.0 |
| <i>GND1</i>   | YHR183W         | chrVIII               | Watson | 470960             | 472429           | 470880                    | 472553                  | 80               | 124              | (Kang et al., 2015, Nagalakshmi, Wang et al., 2008) | -19.8                      | 46.7 |
| <i>HHF1</i>   | YBR009C         | chrII                 | Crick  | 255684             | 255373           | 255728                    | 255004                  | 44               | 369              | (Pelechano et al.,                                  | -6.7                       | 46.7 |

|             |         |         |        |        |        |        |        |     |     |                                                          |        |      |
|-------------|---------|---------|--------|--------|--------|--------|--------|-----|-----|----------------------------------------------------------|--------|------|
|             |         |         |        |        |        |        |        |     |     | 2013)                                                    |        |      |
| <i>MPS1</i> | YDL028C | chrIV   | Crick  | 403291 | 400997 | 403424 | 400847 | 133 | 150 | (Poch, Schwob et al.,<br>1994)                           | -22.9  | 33.3 |
| <i>MSC1</i> | YML128C | chrXIII | Crick  | 16676  | 15135  | 16800  | 14956  | 124 | 179 | (Pelechano et al.,<br>2013)                              | -28.5  | 33.3 |
| <i>NQM1</i> | YGR043C | chrVII  | Crick  | 581436 | 580435 |        |        |     |     |                                                          |        | 46.7 |
| <i>PCT1</i> | YGR202C | chrVII  | Crick  | 904748 | 903474 | 904775 | 903345 | 27  | 129 | (Kang et al., 2015)                                      | -12.3  | 46.7 |
| <i>RTN2</i> | YDL204W | chrIV   | Watson | 94605  | 95786  | 94107  | 95965  | 498 | 179 | (Nagalakshmi et al.,<br>2008, Zhang &<br>Dietrich, 2005) | -128.1 | 33.3 |
| <i>TIP1</i> | YBR067C | chrII   | Crick  | 372735 | 372103 | 372972 | 371870 | 237 | 233 | (Pelechano et al.,<br>2013)                              | -49.0  | 40.0 |
| <i>YRO2</i> | YBR054W | chrII   | Watson | 343101 | 344135 | 342781 | 344496 | 320 | 361 | (Nagalakshmi et al.,<br>2008, Zhang &<br>Dietrich, 2005) | -42.4  | 26.7 |
|             | YKR018C | chrXI   | Crick  | 475900 | 473723 | 475949 | 473546 | 49  | 177 | (Pelechano et al.,<br>2013)                              | -26.7  | 26.7 |

<sup>a</sup>If different isoforms for the indicated mRNA have been reported, we show the nucleotide positions that correspond to the longest mRNA isoforms at either end.

<sup>a</sup>The folding free energy change ( $\Delta G$ ) for the 5'-leader and the first 48 nucleotides of the mRNA was calculated with the RNAstructure 5.8 software package (Bellaousov, Reuter et al., 2013)..

## References

- Bellaousov S, Reuter JS, Seetin MG, Mathews DH (2013) RNAstructure: Web servers for RNA secondary structure prediction and analysis. *Nucleic acids research* 41: W471-4
- Kang YN, Lai DP, Ooi HS, Shen TT, Kou Y, Tian J, Czajkowsky DM, Shao Z, Zhao X (2015) Genome-wide profiling of untranslated regions by paired-end ditag sequencing reveals unexpected transcriptome complexity in yeast. *Molecular genetics and genomics* : MGG 290: 217-24
- Nagalakshmi U, Wang Z, Waern K, Shou C, Raha D, Gerstein M, Snyder M (2008) The transcriptional landscape of the yeast genome defined by RNA sequencing. *Science* 320: 1344-9
- Pelechano V, Wei W, Steinmetz LM (2013) Extensive transcriptional heterogeneity revealed by isoform profiling. *Nature* 497: 127-31
- Poch O, Schwob E, de Fraipont F, Camasses A, Bordonne R, Martin RP (1994) RPK1, an essential yeast protein kinase involved in the regulation of the onset of mitosis, shows homology to mammalian dual-specificity kinases. *Molecular & general genetics* : MGG 243: 641-53
- Zhang Z, Dietrich FS (2005) Mapping of transcription start sites in *Saccharomyces cerevisiae* using 5' SAGE. *Nucleic acids research* 33: 2838-51

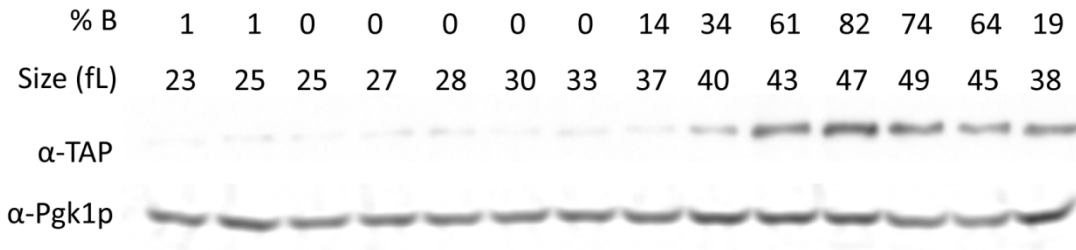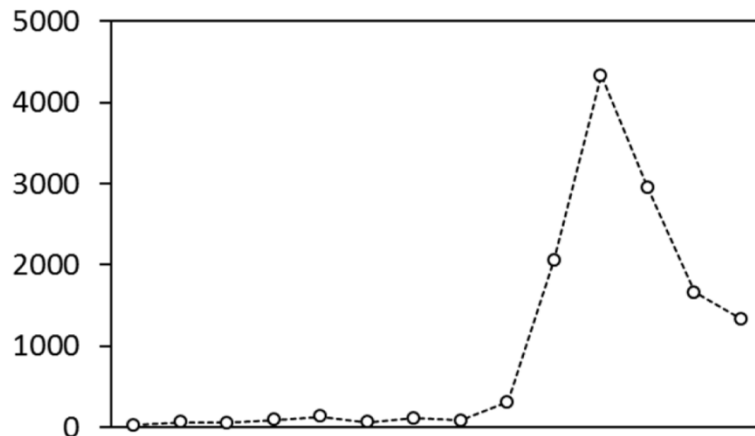

**APPENDIX FIGURE 1. Acc1p-TAP levels drop as cells exit mitosis and re-enter a new cell cycle.**

The experiment was done as in Fig. 4, except that  $\alpha$ -factor was added when cells reached 50% budding index, to maintain synchrony between mother and daughter cells, ensuring that large mother cells stayed in the subsequent G1 phase and did not quickly initiate a new round of DNA replication. In the graph shown at the bottom, on the y-axis are Acc1p-TAP levels, normalized against Pgk1, for every sample examined on the immunoblots shown on the top (x-axis).



|                         |      | <u>MetCysLeu</u> *      |      |
|-------------------------|------|-------------------------|------|
| SGD_Scer_ACC1/YNR016C   | -348 | TCGGTGCATGTGTTTATAA-AAG | -327 |
| MIT_Smik_c642_18747     | -340 | CCGGTGCATGTGTTTATAGCAAG | -318 |
| MIT_Spar_c258_19381     | -337 | TCAGTGCATGTGTTTATAG-AAG | -315 |
| WashU_Sbay_Contig655.32 | -364 | TCGGTGCATGTGCTTATAG-AAG | -343 |

**APPENDIX FIGURE 2. The ACC1 uORF is conserved in the indicated genomic regions of *sensu stricto Saccharomyces* species.** The positions shown are numbered relative to the start of the ACC1 main ORF (position +1) in each case. The figure was generated using the “Fungal Sequence Alignment” function of the Saccharomyces Genome Database (Cherry, Hong et al., 2012).

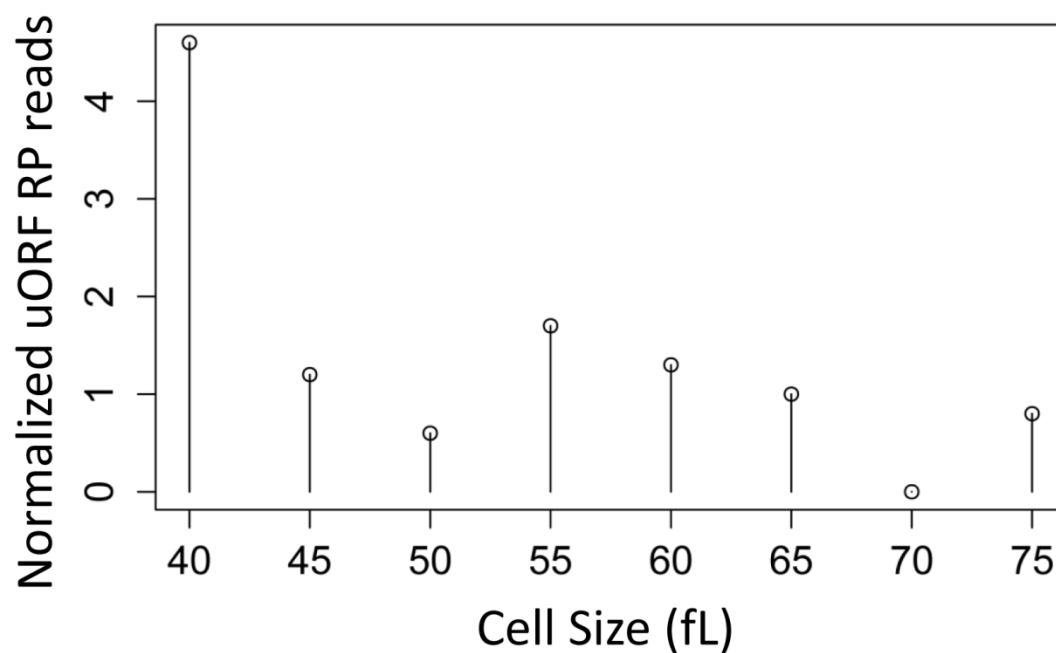

**APPENDIX FIGURE 3. Ribosome occupancy of the *ACC1* uORF in the cell cycle.** Line plots showing the ratio of the ribosome footprint (RP) reads mapping to the *ACC1* uORF normalized against the ribosome footprint reads mapping to the main *ACC1* ORF (y-axis; expressed as [uORF ribosome footprint reads/ ribosome footprint reads mapping to the main *ACC1* ORF] $\times 1000$ ), at the indicated cell sizes (x-axis).

## Appendix File 01

### Contents

|           |                                                     |  |
|-----------|-----------------------------------------------------|--|
| <b>1</b>  | <b>GEO File Names</b>                               |  |
| 1.1       | Table 04: Next Generation Sequencing Data . . . . . |  |
| <b>2</b>  | <b><i>ACC1</i> (Crick Strand)</b>                   |  |
| 2.1       | Table 05: RP and TP Coverage (CDS) . . . . .        |  |
| 2.2       | <i>ACC1</i> CDS Read Size Distribution . . . . .    |  |
| <b>3</b>  | <b><i>DSK2</i> (Watson Strand)</b>                  |  |
| 3.1       | Table 06: RP and TP Coverage (CDS) . . . . .        |  |
| 3.2       | <i>DSK2</i> CDS Read Size Distribution . . . . .    |  |
| <b>4</b>  | <b><i>DYN1</i> (Crick Strand)</b>                   |  |
| 4.1       | Table 07: RP and TP Coverage (CDS) . . . . .        |  |
| 4.2       | <i>DYN1</i> CDS Read Size Distribution . . . . .    |  |
| <b>5</b>  | <b><i>FAS1</i> (Watson Strand)</b>                  |  |
| 5.1       | Table 08: RP and TP Coverage (CDS) . . . . .        |  |
| 5.2       | <i>FAS1</i> CDS Read Size Distribution . . . . .    |  |
| <b>6</b>  | <b><i>FAS2</i> (Watson Strand)</b>                  |  |
| 6.1       | Table 09: RP and TP Coverage (CDS) . . . . .        |  |
| 6.2       | <i>FAS2</i> CDS Read Size Distribution . . . . .    |  |
| <b>7</b>  | <b><i>GAT2</i> (Watson Strand)</b>                  |  |
| 7.1       | Table 10: RP and TP Coverage (CDS) . . . . .        |  |
| 7.2       | <i>GAT2</i> CDS Read Size Distribution . . . . .    |  |
| <b>8</b>  | <b><i>GCV3</i> (Crick Strand)</b>                   |  |
| 8.1       | Table 11: RP and TP Coverage (CDS) . . . . .        |  |
| 8.2       | <i>GCV3</i> CDS Read Size Distribution . . . . .    |  |
| <b>9</b>  | <b><i>GND1</i> (Watson Strand)</b>                  |  |
| 9.1       | Table 12: RP and TP Coverage (CDS) . . . . .        |  |
| 9.2       | <i>GND1</i> CDS Read Size Distribution . . . . .    |  |
| <b>10</b> | <b><i>HHF1</i> (Crick Strand)</b>                   |  |
| 10.1      | Table 13: RP and TP Coverage (CDS) . . . . .        |  |
| 10.2      | <i>HHF1</i> CDS Read Size Distribution . . . . .    |  |
| <b>11</b> | <b><i>MPS1</i> (Crick Strand)</b>                   |  |
| 11.1      | Table 14: RP and TP Coverage (CDS) . . . . .        |  |
| 11.2      | <i>MPS1</i> CDS Read Size Distribution . . . . .    |  |
| <b>12</b> | <b><i>MSC1</i> (Crick Strand)</b>                   |  |
| 12.1      | Table 15: RP and TP Coverage (CDS) . . . . .        |  |
| 12.2      | <i>MSC1</i> CDS Read Size Distribution . . . . .    |  |
| <b>13</b> | <b><i>NQM1</i> (Crick Strand)</b>                   |  |
| 13.1      | Table 16: RP and TP Coverage (CDS) . . . . .        |  |
| 13.2      | <i>NQM1</i> CDS Read Size Distribution . . . . .    |  |

**14 *PCT1* (Crick Strand)**

- 14.1 Table 17: RP and TP Coverage (CDS) . . . . .
- 14.2 *PCT1* (Crick Strand) CDS Read Size Distribution . . . . .

**15 *RTN2* (Watson Strand)**

- 15.1 Table 18: RP and TP Coverage (CDS) . . . . .
- 15.2 *RTN2* CDS Read Size Distribution . . . . .

**16 *TIP1* (Crick Strand)**

- 16.1 Table 19: RP and TP Coverage (CDS) . . . . .

- 16.2 *TIP1* CDS Read Size Distribution . . . . .

**17 *YKR018C* (Crick Strand)**

- 17.1 Table 20: RP and TP Coverage (CDS) . . . . .
- 17.2 *YKR018C* CDS Read Size Distribution . . . . .

**18 *YRO2* (Watson Strand)**

- 18.1 Table 21: RP and TP Coverage (CDS) . . . . .
- 18.2 *YRO2* CDS Read Size Distribution . . . . .

# 1 GEO File Names

## 1.1 Table 04: Next Generation Sequencing Data

|    | Sample Name  | Experiment Class and Cell Volume (fL) | Sample Type   | Raw Data Files |             |
|----|--------------|---------------------------------------|---------------|----------------|-------------|
| 01 | RP-Sample01A | Ribosome-Profile-40fl                 | Protected-RNA | 1A.01-RP.fq    |             |
| 02 | RP-Sample01B | Ribosome-Profile-40fl                 | Protected-RNA | 1B.01-RP.fq    |             |
| 03 | RP-Sample01C | Ribosome-Profile-40fl                 | Protected-RNA | 1C.01-RP.fq    | 1C.02-RP.fq |
| 04 | RP-Sample02A | Ribosome-Profile-45fl                 | Protected-RNA | 2A.01-RP.fq    |             |
| 05 | RP-Sample02B | Ribosome-Profile-45fl                 | Protected-RNA | 2B.01-RP.fq    |             |
| 06 | RP-Sample02C | Ribosome-Profile-45fl                 | Protected-RNA | 2C.01-RP.fq    | 2C.02-RP.fq |
| 07 | RP-Sample03A | Ribosome-Profile-50fl                 | Protected-RNA | 3A.01-RP.fq    |             |
| 08 | RP-Sample03B | Ribosome-Profile-50fl                 | Protected-RNA | 3B.01-RP.fq    |             |
| 09 | RP-Sample03C | Ribosome-Profile-50fl                 | Protected-RNA | 3C.01-RP.fq    | 3C.02-RP.fq |
| 10 | RP-Sample04A | Ribosome-Profile-55fl                 | Protected-RNA | 4A.01-RP.fq    |             |
| 11 | RP-Sample04B | Ribosome-Profile-55fl                 | Protected-RNA | 4B.01-RP.fq    |             |
| 12 | RP-Sample04C | Ribosome-Profile-55fl                 | Protected-RNA | 4C.01-RP.fq    | 4C.02-RP.fq |
| 13 | RP-Sample05A | Ribosome-Profile-60fl                 | Protected-RNA | 5A.01-RP.fq    |             |
| 14 | RP-Sample05B | Ribosome-Profile-60fl                 | Protected-RNA | 5B.01-RP.fq    |             |
| 15 | RP-Sample05C | Ribosome-Profile-60fl                 | Protected-RNA | 5C.01-RP.fq    | 5C.02-RP.fq |
| 16 | RP-Sample06A | Ribosome-Profile-65fl                 | Protected-RNA | 6A.01-RP.fq    |             |
| 17 | RP-Sample06B | Ribosome-Profile-65fl                 | Protected-RNA | 6B.01-RP.fq    |             |
| 18 | RP-Sample06C | Ribosome-Profile-65fl                 | Protected-RNA | 6C.01-RP.fq    | 6C.02-RP.fq |
| 19 | RP-Sample07A | Ribosome-Profile-70fl                 | Protected-RNA | 7A.01-RP.fq    |             |
| 20 | RP-Sample07B | Ribosome-Profile-70fl                 | Protected-RNA | 7B.01-RP.fq    |             |
| 21 | RP-Sample07C | Ribosome-Profile-70fl                 | Protected-RNA | 7C.01-RP.fq    | 7C.02-RP.fq |
| 22 | RP-Sample08A | Ribosome-Profile-75fl                 | Protected-RNA | 8A.01-RP.fq    |             |
| 23 | RP-Sample08B | Ribosome-Profile-75fl                 | Protected-RNA | 8B.01-RP.fq    |             |
| 24 | RP-Sample08C | Ribosome-Profile-75fl                 | Protected-RNA | 8C.01-RP.fq    | 8C.02-RP.fq |
| 25 | TP-Sample01A | Transcriptional-Profile-40fl          | PolyA-RNA     | 1A.01-TP.fq    |             |
| 26 | TP-Sample01B | Transcriptional-Profile-40fl          | PolyA-RNA     | 1B.01-TP.fq    |             |
| 27 | TP-Sample01C | Transcriptional-Profile-40fl          | PolyA-RNA     | 1C.01-TP.fq    | 1C.02-TP.fq |
| 28 | TP-Sample02A | Transcriptional-Profile-45fl          | PolyA-RNA     | 2A.01-TP.fq    |             |
| 29 | TP-Sample02B | Transcriptional-Profile-45fl          | PolyA-RNA     | 2B.01-TP.fq    |             |
| 30 | TP-Sample02C | Transcriptional-Profile-45fl          | PolyA-RNA     | 2C.01-TP.fq    | 2C.02-TP.fq |
| 31 | TP-Sample03A | Transcriptional-Profile-50fl          | PolyA-RNA     | 3A.01-TP.fq    |             |
| 32 | TP-Sample03B | Transcriptional-Profile-50fl          | PolyA-RNA     | 3B.01-TP.fq    |             |
| 33 | TP-Sample03C | Transcriptional-Profile-50fl          | PolyA-RNA     | 3C.01-TP.fq    | 3C.02-TP.fq |
| 34 | TP-Sample04A | Transcriptional-Profile-55fl          | PolyA-RNA     | 4A.01-TP.fq    |             |
| 35 | TP-Sample04B | Transcriptional-Profile-55fl          | PolyA-RNA     | 4B.01-TP.fq    |             |
| 36 | TP-Sample04C | Transcriptional-Profile-55fl          | PolyA-RNA     | 4C.01-TP.fq    | 4C.02-TP.fq |
| 37 | TP-Sample05A | Transcriptional-Profile-60fl          | PolyA-RNA     | 5A.01-TP.fq    |             |
| 38 | TP-Sample05B | Transcriptional-Profile-60fl          | PolyA-RNA     | 5B.01-TP.fq    |             |
| 39 | TP-Sample05C | Transcriptional-Profile-60fl          | PolyA-RNA     | 5C.01-TP.fq    | 5C.02-TP.fq |
| 40 | TP-Sample06A | Transcriptional-Profile-65fl          | PolyA-RNA     | 6A.01-TP.fq    |             |
| 41 | TP-Sample06B | Transcriptional-Profile-65fl          | PolyA-RNA     | 6B.01-TP.fq    |             |
| 42 | TP-Sample06C | Transcriptional-Profile-65fl          | PolyA-RNA     | 6C.01-TP.fq    | 6C.02-TP.fq |
| 43 | TP-Sample07A | Transcriptional-Profile-70fl          | PolyA-RNA     | 7A.01-TP.fq    |             |
| 44 | TP-Sample07B | Transcriptional-Profile-70fl          | PolyA-RNA     | 7B.01-TP.fq    |             |
| 45 | TP-Sample07C | Transcriptional-Profile-70fl          | PolyA-RNA     | 7C.01-TP.fq    | 7C.02-TP.fq |
| 46 | TP-Sample08A | Transcriptional-Profile-75fl          | PolyA-RNA     | 8A.01-TP.fq    |             |
| 47 | TP-Sample08B | Transcriptional-Profile-75fl          | PolyA-RNA     | 8B.01-TP.fq    |             |
| 48 | TP-Sample08C | Transcriptional-Profile-75fl          | PolyA-RNA     | 8C.01-TP.fq    | 8C.02-TP.fq |

## 2 *ACC1* (Crick Strand)

### 2.1 Table 05: RP and TP Coverage (CDS)

CDS: ChrXIV:654673..661374 (6701 bp)

| Experimental:      | Strand | Ribosome Profiling (RP) |          | Transcriptional Profiling (TP) |          |
|--------------------|--------|-------------------------|----------|--------------------------------|----------|
|                    |        | Number of Reads         | Coverage | Number of Reads                | Coverage |
| 1                  | Watson | 19                      | .054     | 781                            | 5.495    |
|                    | Crick  | 12857                   | 51.613   | 7382                           | 51.481   |
| 2                  | Watson | 5                       | .014     | 409                            | 2.750    |
|                    | Crick  | 15524                   | 60.904   | 11631                          | 80.428   |
| 3                  | Watson | 1                       | .002     | 409                            | 2.746    |
|                    | Crick  | 1608                    | 6.360    | 7788                           | 53.939   |
| 4                  | Watson | 11                      | .032     | 447                            | 3.030    |
|                    | Crick  | 30617                   | 122.391  | 7072                           | 48.809   |
| 5                  | Watson | 2                       | .005     | 97                             | .645     |
|                    | Crick  | 5235                    | 20.138   | 2980                           | 20.775   |
| 6                  | Watson | 0                       | 0.00     | 241                            | 1.614    |
|                    | Crick  | 3105                    | 12.761   | 2930                           | 20.316   |
| 7                  | Watson | 1                       | .002     | 318                            | 2.197    |
|                    | Crick  | 1850                    | 7.444    | 4959                           | 34.916   |
| 8                  | Watson | 9                       | .027     | 244                            | 1.630    |
|                    | Crick  | 9156                    | 37.652   | 2817                           | 19.504   |
| Control (Ingolia): |        |                         |          |                                |          |
| Rich               | Watson | 4                       | .016     | 80                             | .294     |
|                    | Crick  | 1586                    | 6.381    | 1306                           | 4.726    |
| Starved            | Watson | 2                       | .006     | 18                             | .064     |
|                    | Crick  | 1528                    | 6.012    | 451                            | 1.636    |

## 2.2 *ACC1* CDS Read Size Distribution

Ribosome Profiling (RP)

Percentage (y-axis) versus Read Size (nt)(x-axis)

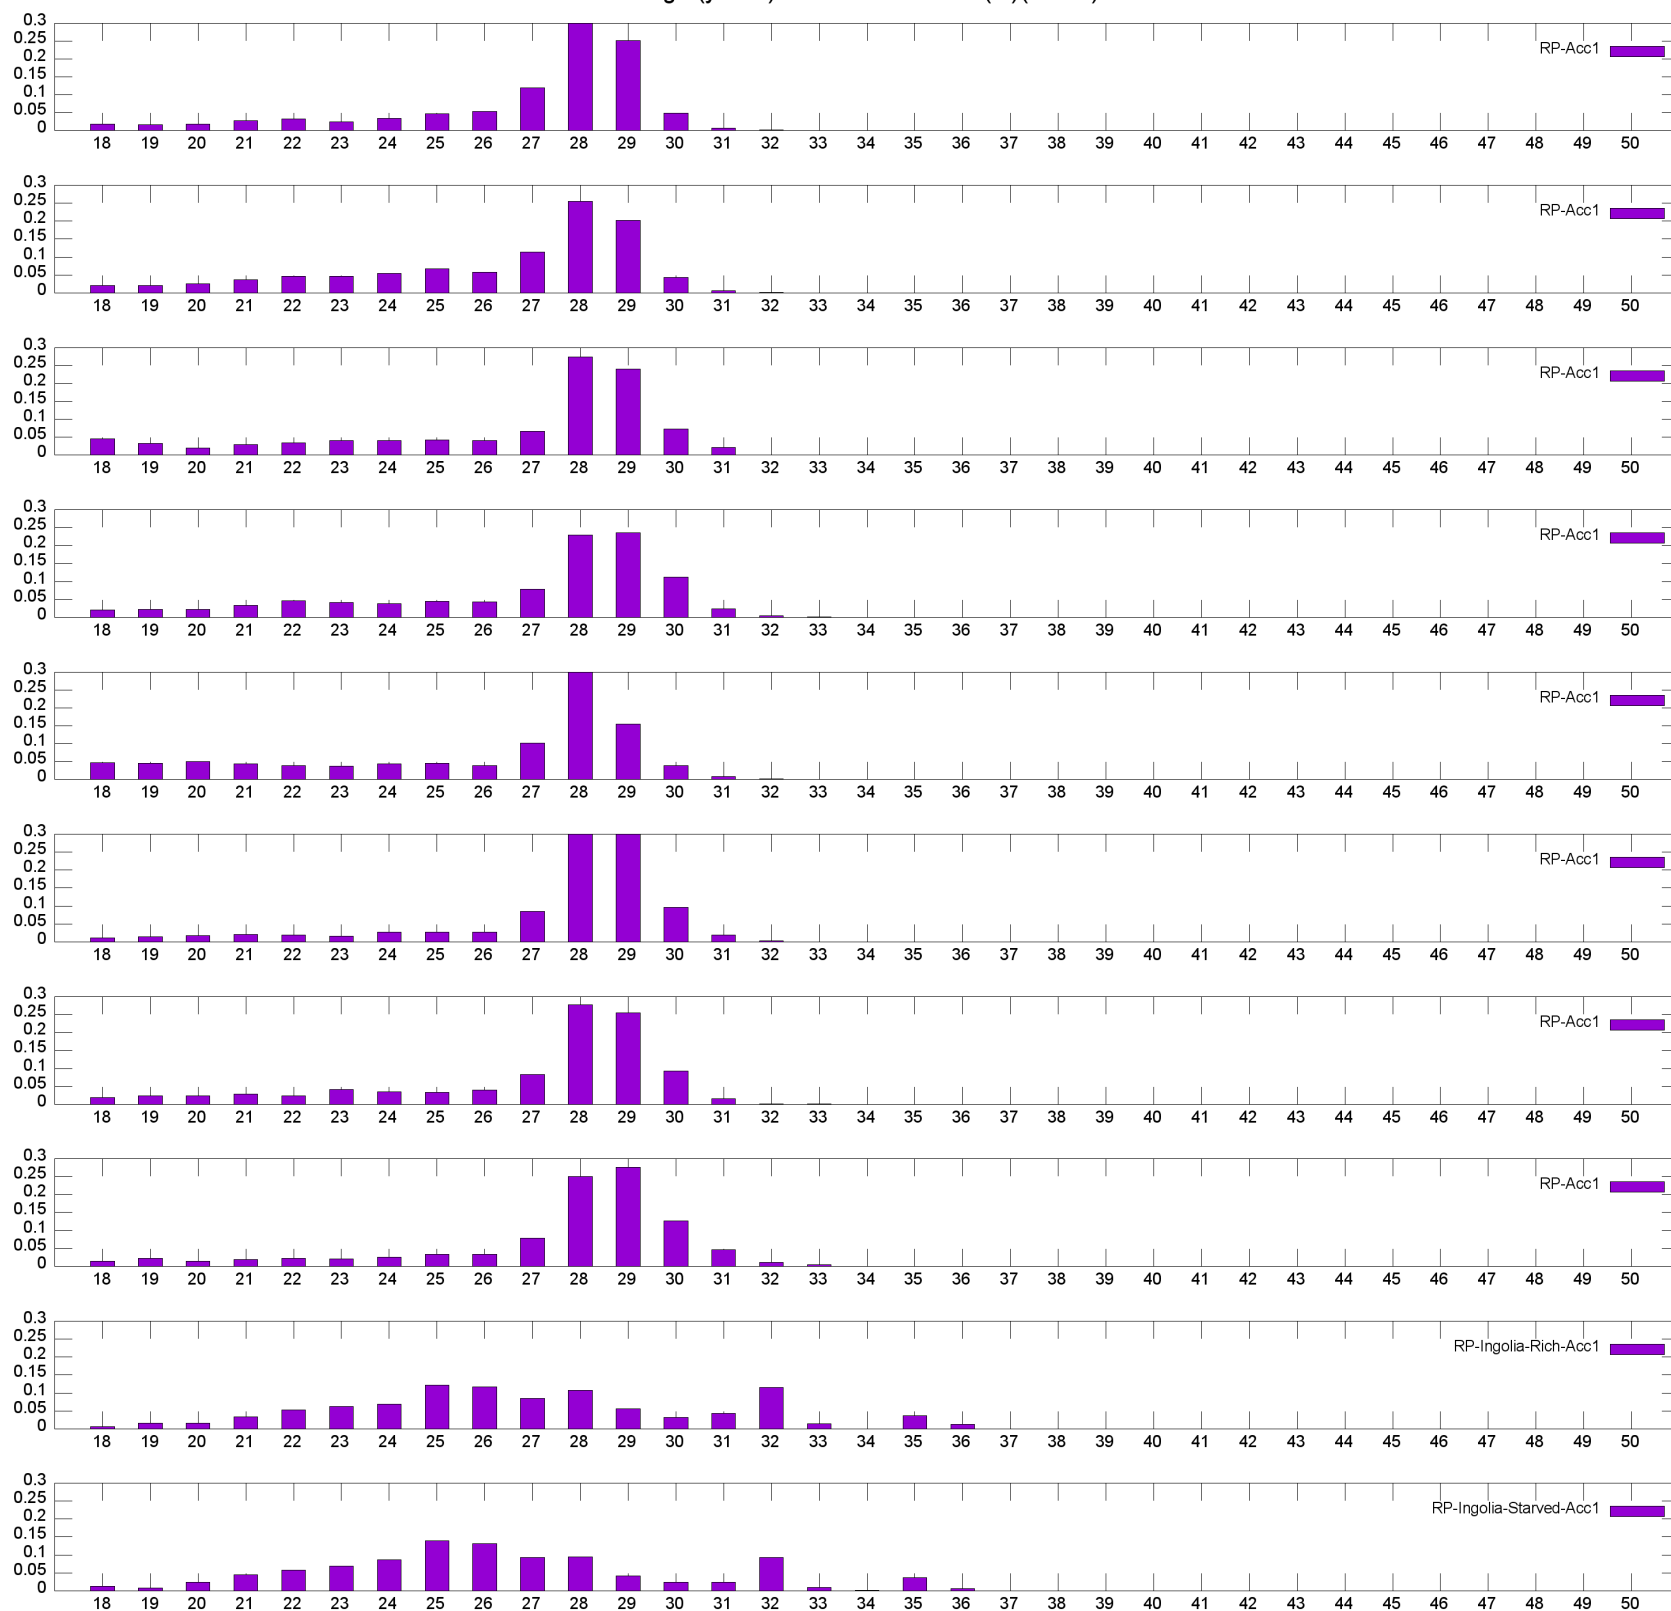

Figure 4: *ACC1* CDS Crick Reads Size Distribution (RP)

### 3 *DSK2* (Watson Strand)

#### 3.1 Table 06: RP and TP Coverage (CDS)

CDS: ChrXIII:818827..819948 (1121 bp)

| Experimental:      | Strand | Ribosome Profiling (RP) |          | Transcriptional Profiling (TP) |          |
|--------------------|--------|-------------------------|----------|--------------------------------|----------|
|                    |        | Number of Reads         | Coverage | Number of Reads                | Coverage |
| 1                  | Watson | 1364                    | 32.756   | 431                            | 18.232   |
|                    | Crick  | 2                       | .033     | 96                             | 4.018    |
| 2                  | Watson | 1352                    | 31.521   | 1132                           | 46.761   |
|                    | Crick  | 2                       | .041     | 87                             | 3.357    |
| 3                  | Watson | 297                     | 7.297    | 1075                           | 43.719   |
|                    | Crick  | 0                       | 0.00     | 65                             | 2.483    |
| 4                  | Watson | 2337                    | 55.573   | 967                            | 40.103   |
|                    | Crick  | 6                       | .132     | 85                             | 3.443    |
| 5                  | Watson | 596                     | 13.776   | 509                            | 21.057   |
|                    | Crick  | 0                       | 0.00     | 27                             | 1.132    |
| 6                  | Watson | 416                     | 10.191   | 426                            | 17.702   |
|                    | Crick  | 0                       | 0.00     | 50                             | 2.087    |
| 7                  | Watson | 279                     | 6.730    | 559                            | 23.787   |
|                    | Crick  | 1                       | .016     | 51                             | 2.056    |
| 8                  | Watson | 886                     | 22.221   | 606                            | 25.246   |
|                    | Crick  | 15                      | .251     | 53                             | 2.059    |
| Control (Ingolia): |        |                         |          |                                |          |
| Rich               | Watson | 385                     | 8.976    | 463                            | 9.943    |
|                    | Crick  | 0                       | 0.00     | 18                             | .380     |
| Starved            | Watson | 540                     | 12.297   | 239                            | 5.247    |
|                    | Crick  | 0                       | 0.00     | 6                              | .124     |



### 3.2 *DSK2* CDS Read Size Distribution

Ribosome Profiling (RP)

Percentage (y-axis) versus Read Size (nt)(x-axis)

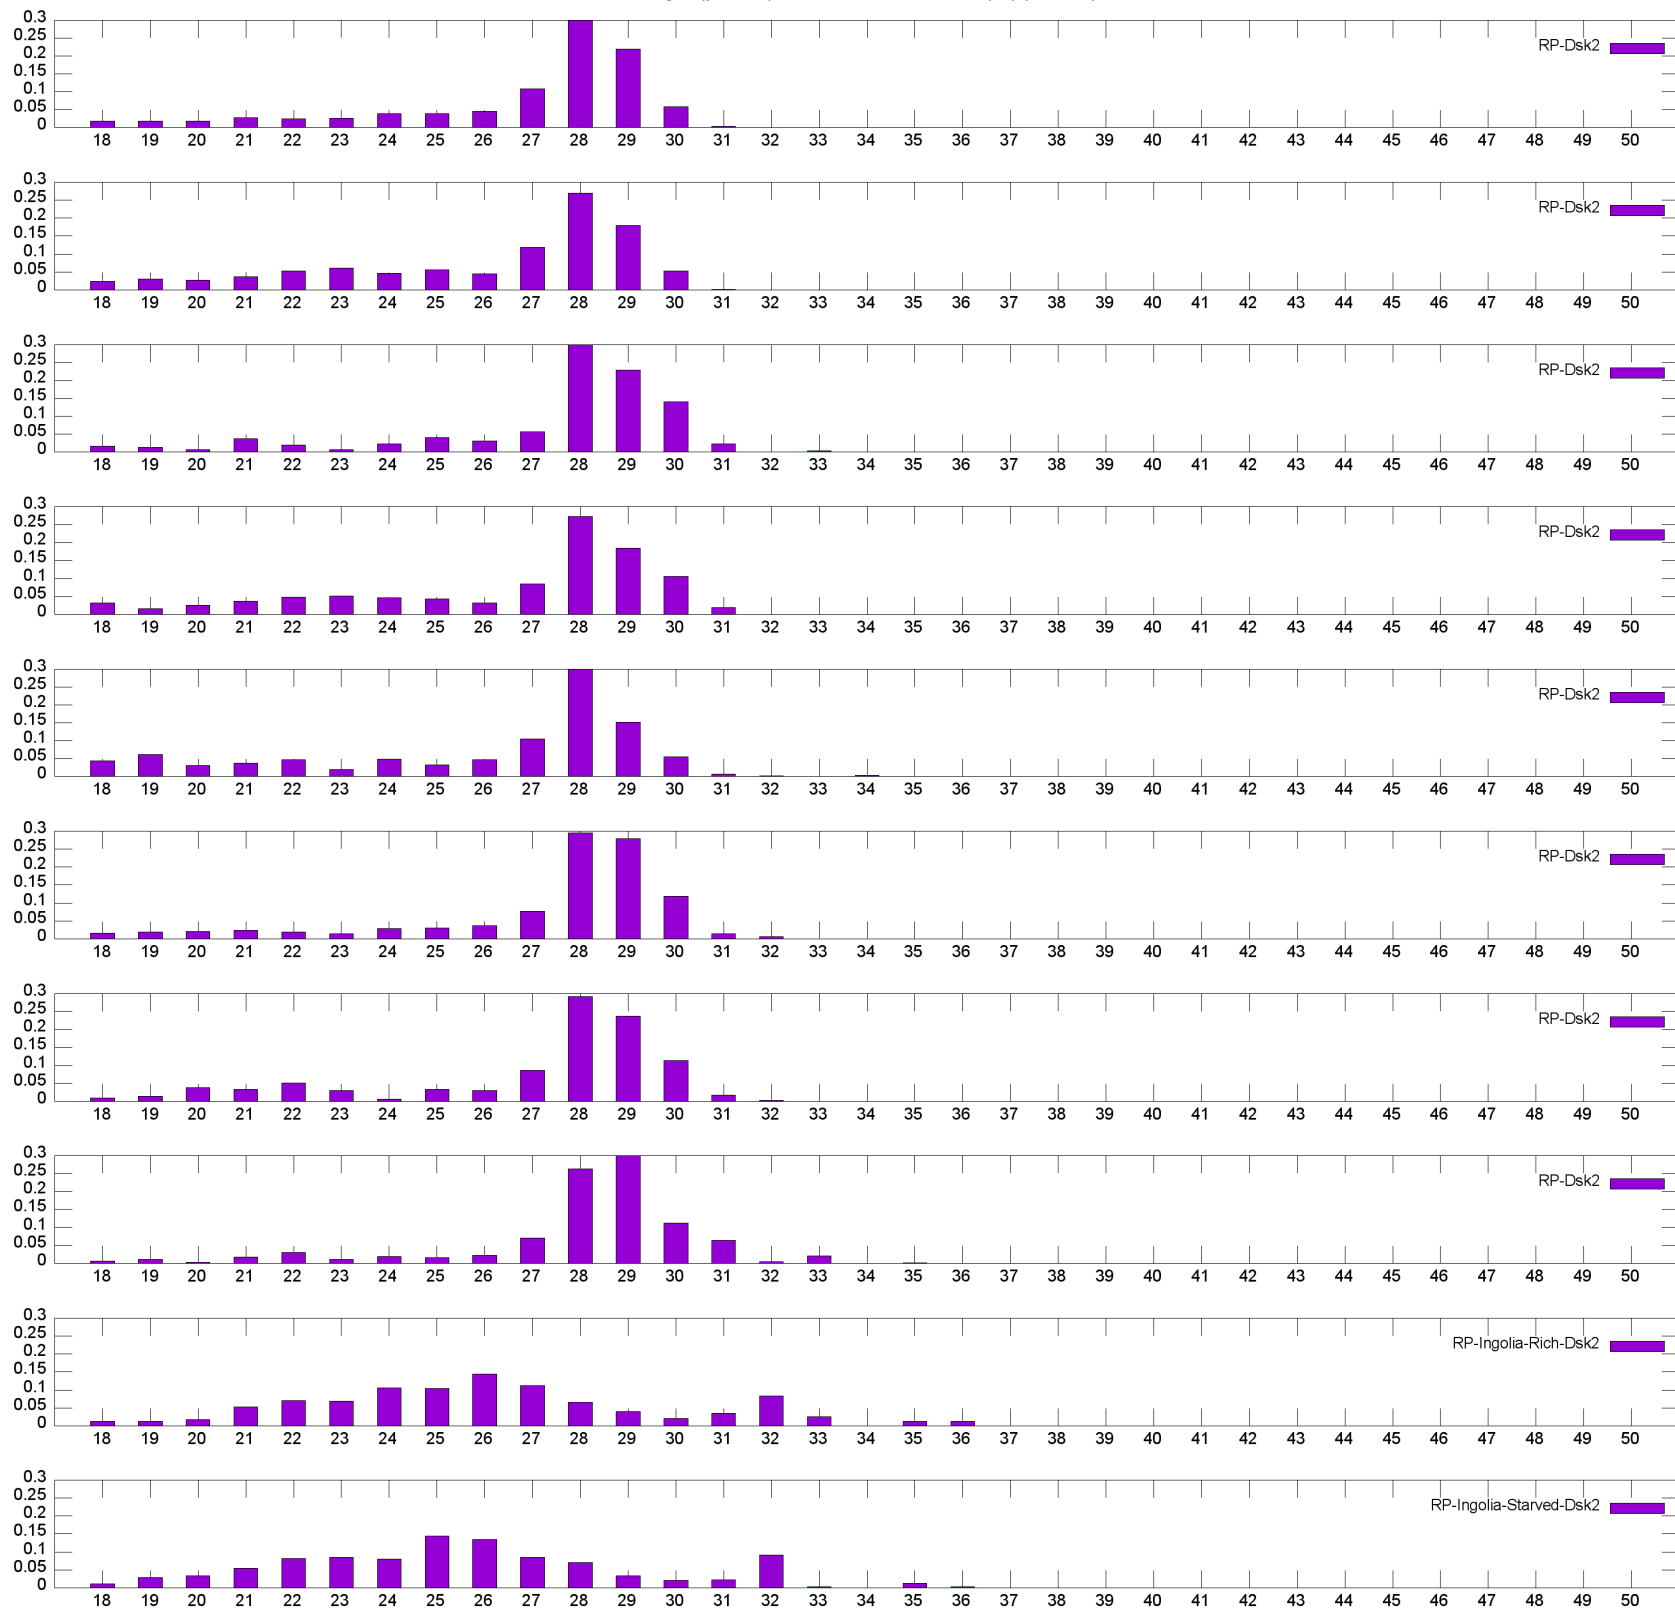

Figure 5: *DSK2* CDS Watson Reads Size Distribution (RP)

## 4 *DYN1* (Crick Strand)

### 4.1 Table 07: RP and TP Coverage (CDS)

CDS: ChrXI:535647..547925 (12278 bp)

| Experimental:      | Strand | Ribosome Profiling (RP) |          | Transcriptional Profiling (TP) |          |
|--------------------|--------|-------------------------|----------|--------------------------------|----------|
|                    |        | Number of Reads         | Coverage | Number of Reads                | Coverage |
| 1                  | Watson | 24128                   | 52.267   | 29712                          | 112.780  |
|                    | Crick  | 3636                    | 7.734    | 10853                          | 41.981   |
| 2                  | Watson | 17863                   | 37.500   | 109891                         | 416.161  |
|                    | Crick  | 3056                    | 6.348    | 14458                          | 54.791   |
| 3                  | Watson | 4929                    | 11.353   | 83078                          | 313.598  |
|                    | Crick  | 707                     | 1.495    | 15700                          | 59.701   |
| 4                  | Watson | 28152                   | 59.872   | 64070                          | 240.397  |
|                    | Crick  | 4848                    | 10.282   | 14425                          | 54.797   |
| 5                  | Watson | 12223                   | 26.575   | 52063                          | 197.280  |
|                    | Crick  | 1862                    | 3.930    | 9689                           | 36.744   |
| 6                  | Watson | 3345                    | 7.548    | 50818                          | 188.437  |
|                    | Crick  | 814                     | 1.701    | 15829                          | 59.956   |
| 7                  | Watson | 9809                    | 21.276   | 50407                          | 191.434  |
|                    | Crick  | 1101                    | 2.346    | 13819                          | 53.069   |
| 8                  | Watson | 14749                   | 32.332   | 35169                          | 131.737  |
|                    | Crick  | 2645                    | 5.802    | 10764                          | 40.866   |
| Control (Ingolia): |        |                         |          |                                |          |
| Rich               | Watson | 1444                    | 3.221    | 8313                           | 16.392   |
|                    | Crick  | 680                     | 1.499    | 3869                           | 7.578    |
| Starved            | Watson | 1026                    | 2.187    | 1344                           | 2.657    |
|                    | Crick  | 812                     | 1.730    | 1031                           | 2.036    |

## 4.2 *DYN1* CDS Read Size Distribution

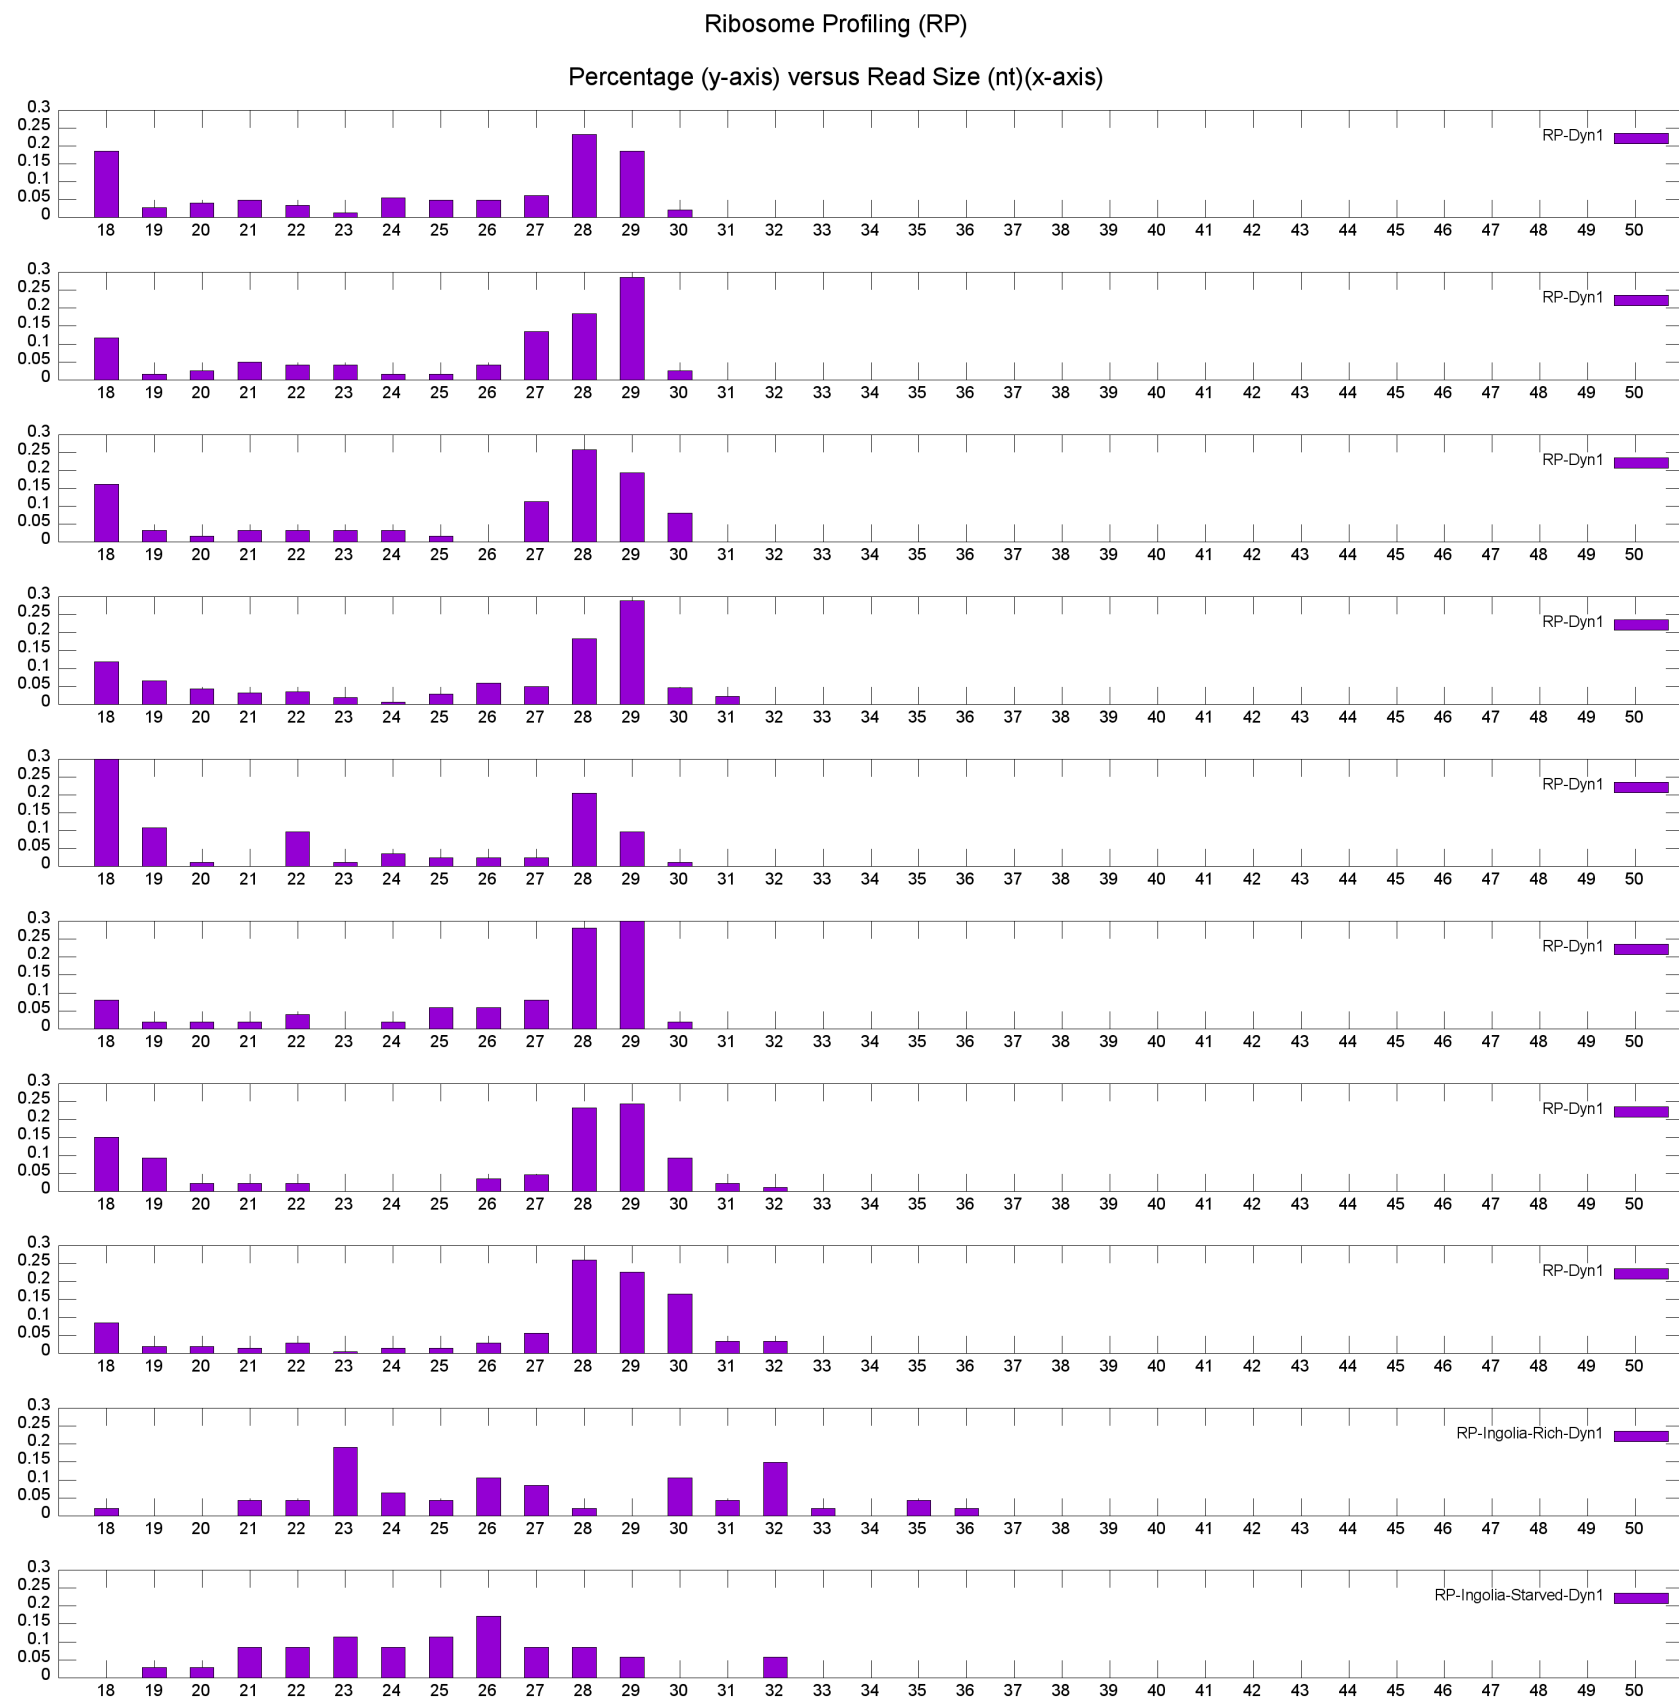

Figure 6: *DYN1* CDS Crick Reads Size Distribution (RP)

## 5 *FAS1* (Watson Strand)

### 5.1 Table 08: RP and TP Coverage (CDS)

CDS: ChrXI:100671..106826 (6155 bp)

| Experimental:      | Strand | Ribosome Profiling (RP) |          | Transcriptional Profiling (TP) |          |
|--------------------|--------|-------------------------|----------|--------------------------------|----------|
|                    |        | Number of Reads         | Coverage | Number of Reads                | Coverage |
| 1                  | Watson | 33337                   | 144.293  | 12240                          | 93.916   |
|                    | Crick  | 1434                    | 6.227    | 3979                           | 30.463   |
| 2                  | Watson | 30841                   | 130.579  | 16778                          | 125.081  |
|                    | Crick  | 1273                    | 5.418    | 4916                           | 37.027   |
| 3                  | Watson | 3972                    | 16.970   | 12690                          | 94.499   |
|                    | Crick  | 344                     | 1.496    | 5838                           | 43.973   |
| 4                  | Watson | 58210                   | 251.243  | 12980                          | 96.820   |
|                    | Crick  | 1919                    | 8.145    | 4760                           | 35.807   |
| 5                  | Watson | 9859                    | 40.927   | 8948                           | 67.435   |
|                    | Crick  | 439                     | 1.830    | 4341                           | 32.749   |
| 6                  | Watson | 6498                    | 28.625   | 11265                          | 84.395   |
|                    | Crick  | 432                     | 1.931    | 5828                           | 44.262   |
| 7                  | Watson | 5577                    | 23.873   | 12578                          | 95.729   |
|                    | Crick  | 432                     | 1.881    | 5996                           | 45.974   |
| 8                  | Watson | 20378                   | 90.265   | 7529                           | 56.065   |
|                    | Crick  | 1347                    | 5.982    | 3136                           | 23.658   |
| Control (Ingolia): |        |                         |          |                                |          |
| Rich               | Watson | 3227                    | 14.165   | 5640                           | 22.276   |
|                    | Crick  | 194                     | .852     | 1466                           | 5.783    |
| Starved            | Watson | 2030                    | 8.656    | 815                            | 3.221    |
|                    | Crick  | 326                     | 1.360    | 333                            | 1.344    |

## 5.2 *FAS1* CDS Read Size Distribution

Ribosome Profiling (RP)

Percentage (y-axis) versus Read Size (nt)(x-axis)

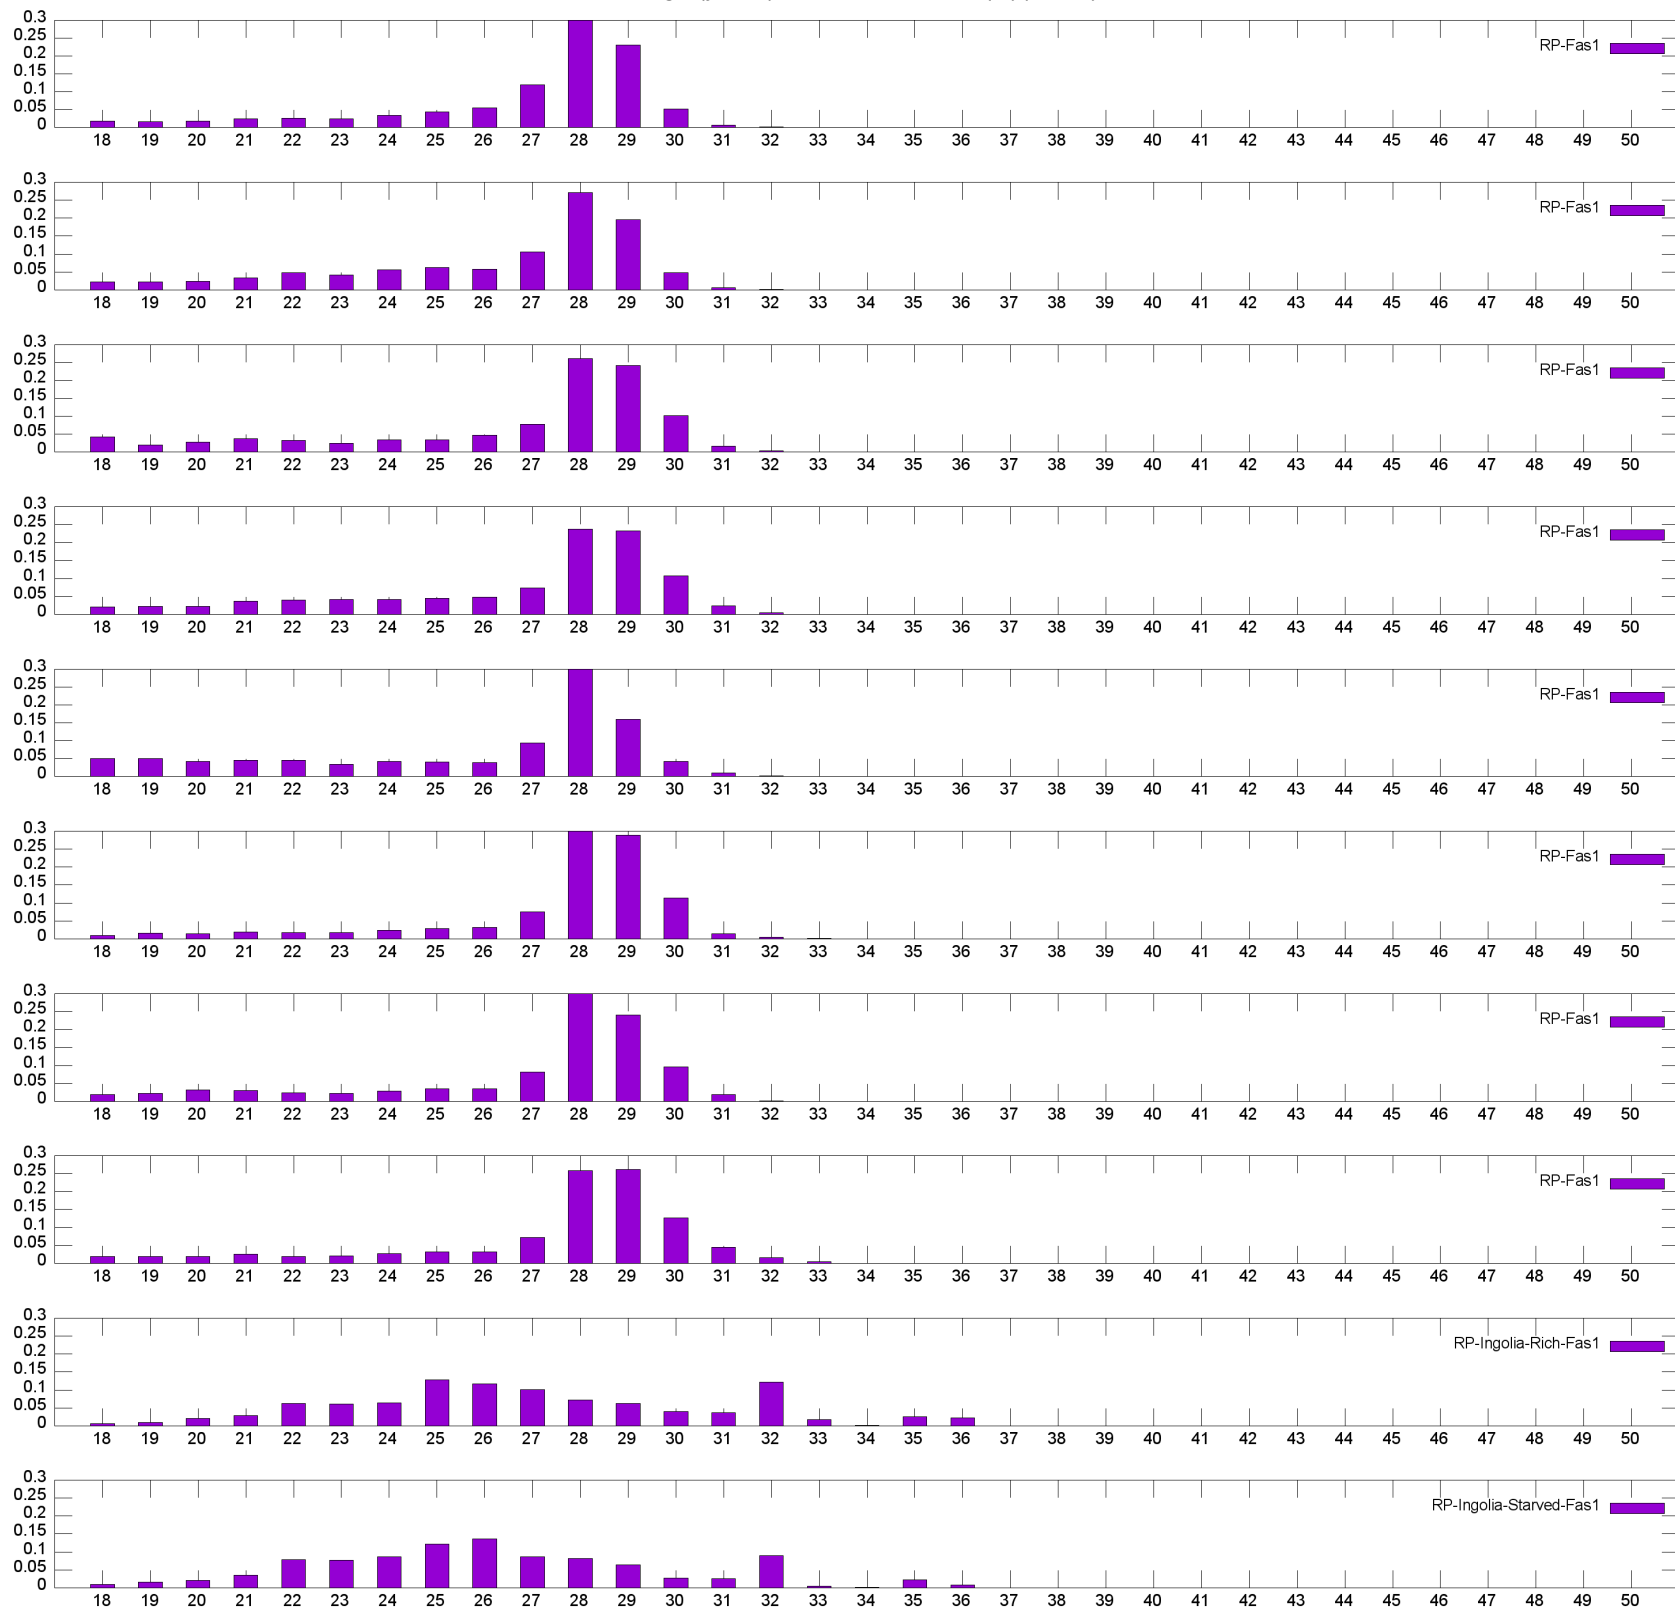

Figure 7: *FAS1* CDS Watson Reads Size Distribution (RP)

## 6 *FAS2* (Watson Strand)

### 6.1 Table 09: RP and TP Coverage (CDS)

CDS: ChrXVI:108652..114315 (5663 bp)

| Experimental:      | Strand | Ribosome Profiling (RP) |          | Transcriptional Profiling (TP) |          |
|--------------------|--------|-------------------------|----------|--------------------------------|----------|
|                    |        | Number of Reads         | Coverage | Number of Reads                | Coverage |
| 1                  | Watson | 24546                   | 116.979  | 3111                           | 26.002   |
|                    | Crick  | 71                      | .232     | 174                            | 1.413    |
| 2                  | Watson | 19706                   | 91.612   | 3782                           | 30.757   |
|                    | Crick  | 14                      | .045     | 122                            | .988     |
| 3                  | Watson | 1668                    | 7.927    | 2704                           | 22.048   |
|                    | Crick  | 6                       | .019     | 102                            | .806     |
| 4                  | Watson | 38613                   | 182.812  | 2730                           | 22.261   |
|                    | Crick  | 4                       | .013     | 112                            | .933     |
| 5                  | Watson | 6365                    | 28.871   | 1053                           | 8.652    |
|                    | Crick  | 7                       | .022     | 26                             | .201     |
| 6                  | Watson | 4217                    | 20.440   | 1106                           | 9.011    |
|                    | Crick  | 1                       | .003     | 55                             | .443     |
| 7                  | Watson | 2416                    | 11.492   | 2335                           | 19.466   |
|                    | Crick  | 4                       | .013     | 106                            | .876     |
| 8                  | Watson | 11262                   | 54.757   | 1657                           | 13.678   |
|                    | Crick  | 23                      | .076     | 138                            | 1.139    |
| Control (Ingolia): |        |                         |          |                                |          |
| Rich               | Watson | 2067                    | 9.829    | 1602                           | 6.806    |
|                    | Crick  | 1                       | .003     | 8                              | .029     |
| Starved            | Watson | 1882                    | 8.669    | 464                            | 1.999    |
|                    | Crick  | 1                       | .004     | 3                              | .010     |

## 6.2 *FAS2* CDS Read Size Distribution

Ribosome Profiling (RP)

Percentage (y-axis) versus Read Size (nt)(x-axis)

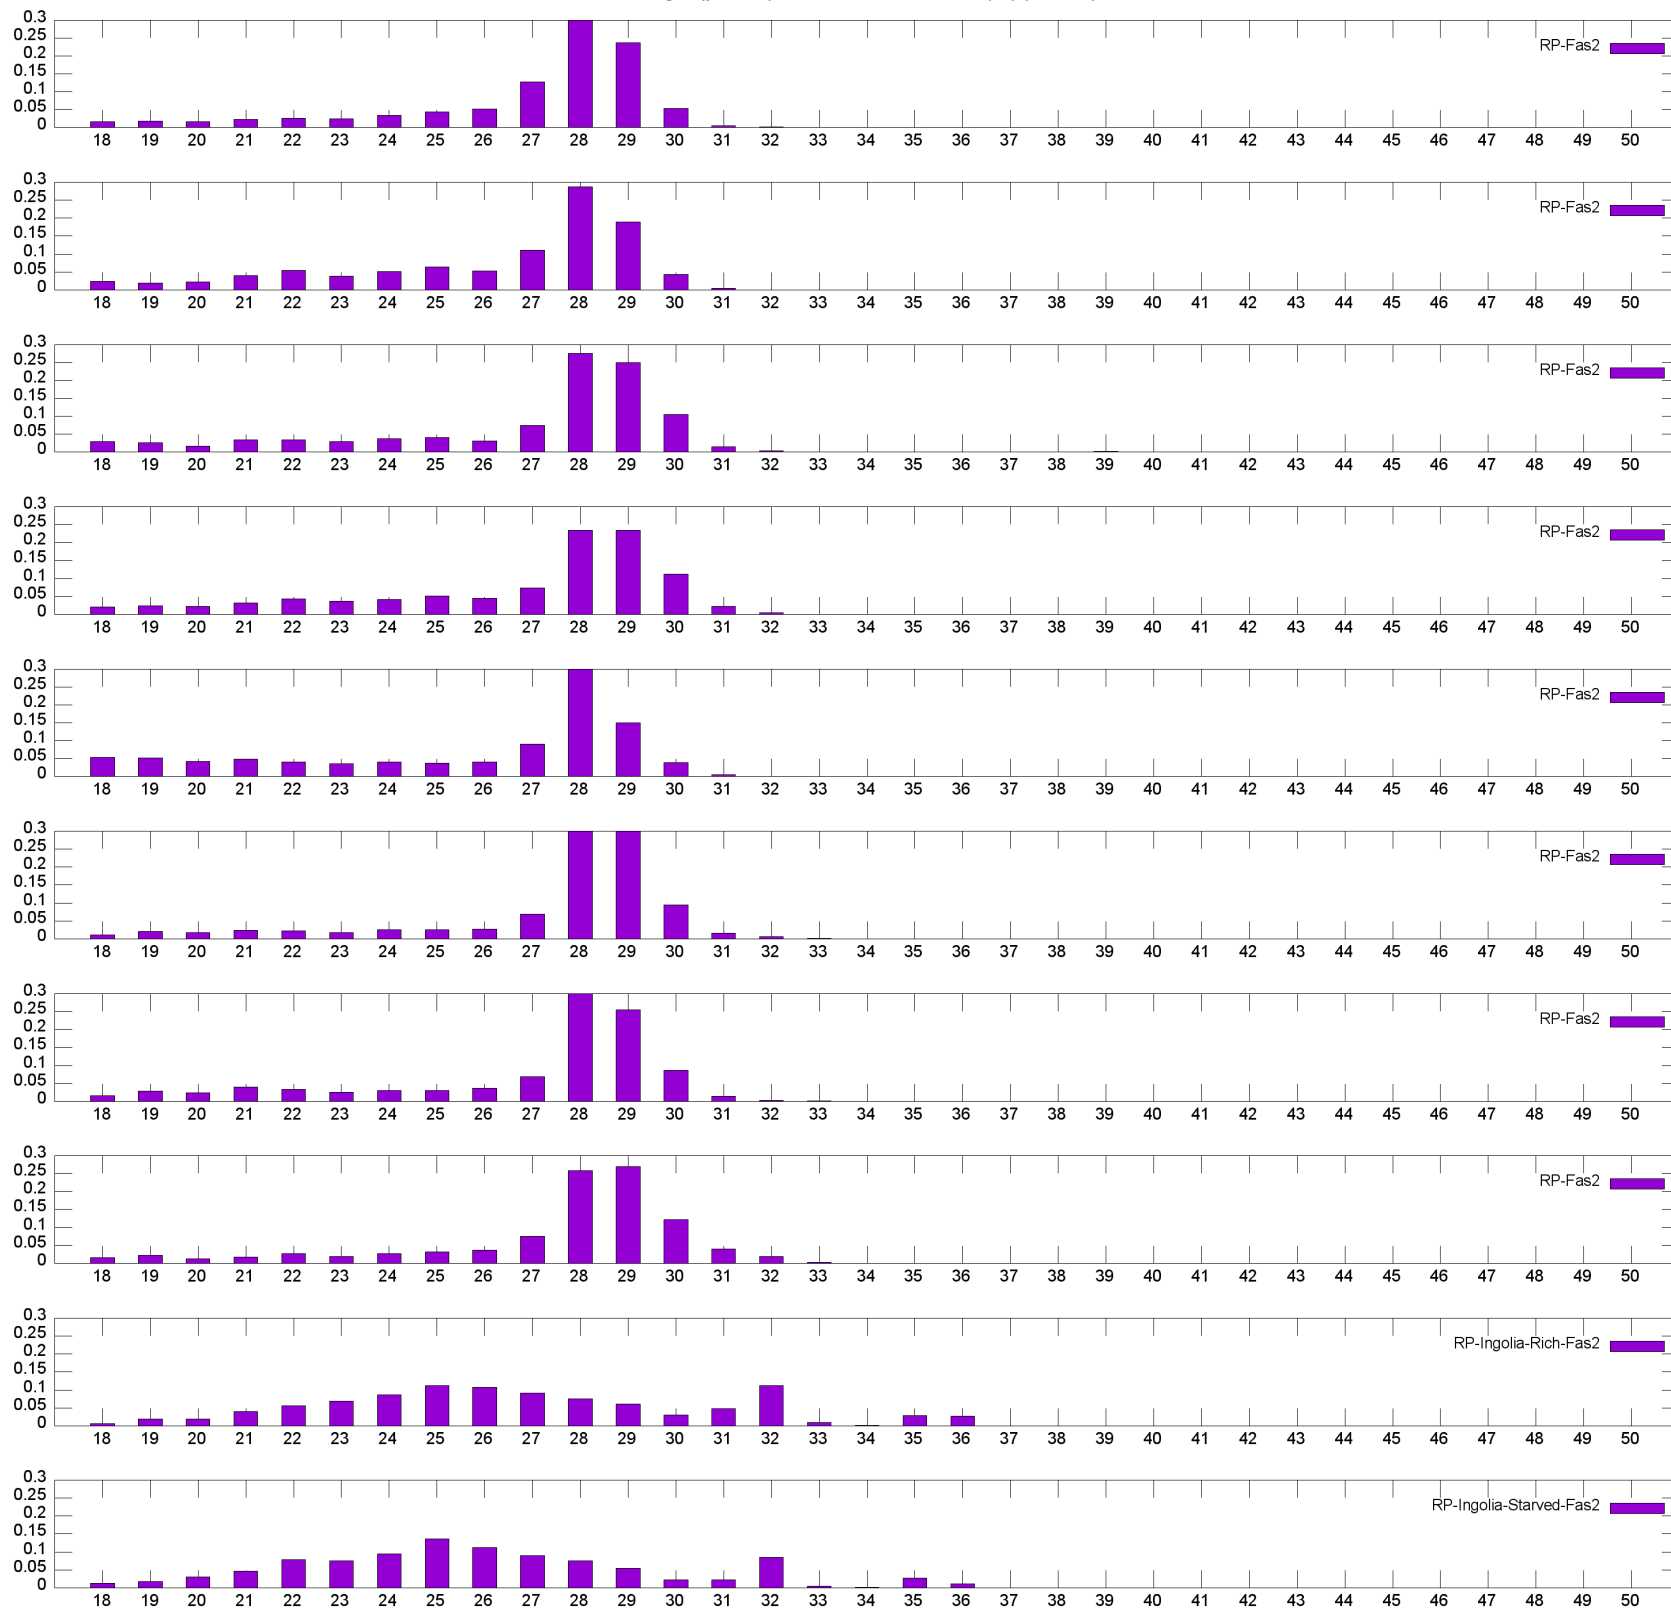

Figure 8: *FAS2* CDS Watson Reads Size Distribution (RP)

## 7 *GAT2* (Watson Strand)

### 7.1 Table 10: RP and TP Coverage (CDS)

CDS: ChrXIII:541199..542881 (1682 bp)

| Experimental:      | Strand | Ribosome Profiling (RP) |          | Transcriptional Profiling (TP) |          |
|--------------------|--------|-------------------------|----------|--------------------------------|----------|
|                    |        | Number of Reads         | Coverage | Number of Reads                | Coverage |
| 1                  | Watson | 1491                    | 23.903   | 876                            | 24.442   |
|                    | Crick  | 4                       | .045     | 63                             | 1.763    |
| 2                  | Watson | 732                     | 11.403   | 1593                           | 44.008   |
|                    | Crick  | 4                       | .043     | 72                             | 1.960    |
| 3                  | Watson | 71                      | 1.131    | 2122                           | 58.486   |
|                    | Crick  | 1                       | .010     | 105                            | 2.876    |
| 4                  | Watson | 221                     | 3.419    | 2244                           | 62.400   |
|                    | Crick  | 1                       | .010     | 148                            | 4.089    |
| 5                  | Watson | 54                      | .826     | 1327                           | 36.879   |
|                    | Crick  | 2                       | .021     | 54                             | 1.462    |
| 6                  | Watson | 71                      | 1.152    | 2116                           | 58.702   |
|                    | Crick  | 0                       | 0.00     | 64                             | 1.750    |
| 7                  | Watson | 91                      | 1.480    | 2287                           | 64.146   |
|                    | Crick  | 0                       | 0.00     | 76                             | 2.088    |
| 8                  | Watson | 506                     | 8.366    | 2187                           | 60.840   |
|                    | Crick  | 3                       | .035     | 110                            | 3.055    |
| Control (Ingolia): |        |                         |          |                                |          |
| Rich               | Watson | 22                      | .345     | 111                            | 1.577    |
|                    | Crick  | 0                       | 0.00     | 8                              | .110     |
| Starved            | Watson | 65                      | .997     | 29                             | .398     |
|                    | Crick  | 4                       | .049     | 0                              | 0.00     |



## 7.2 *GAT2* CDS Read Size Distribution

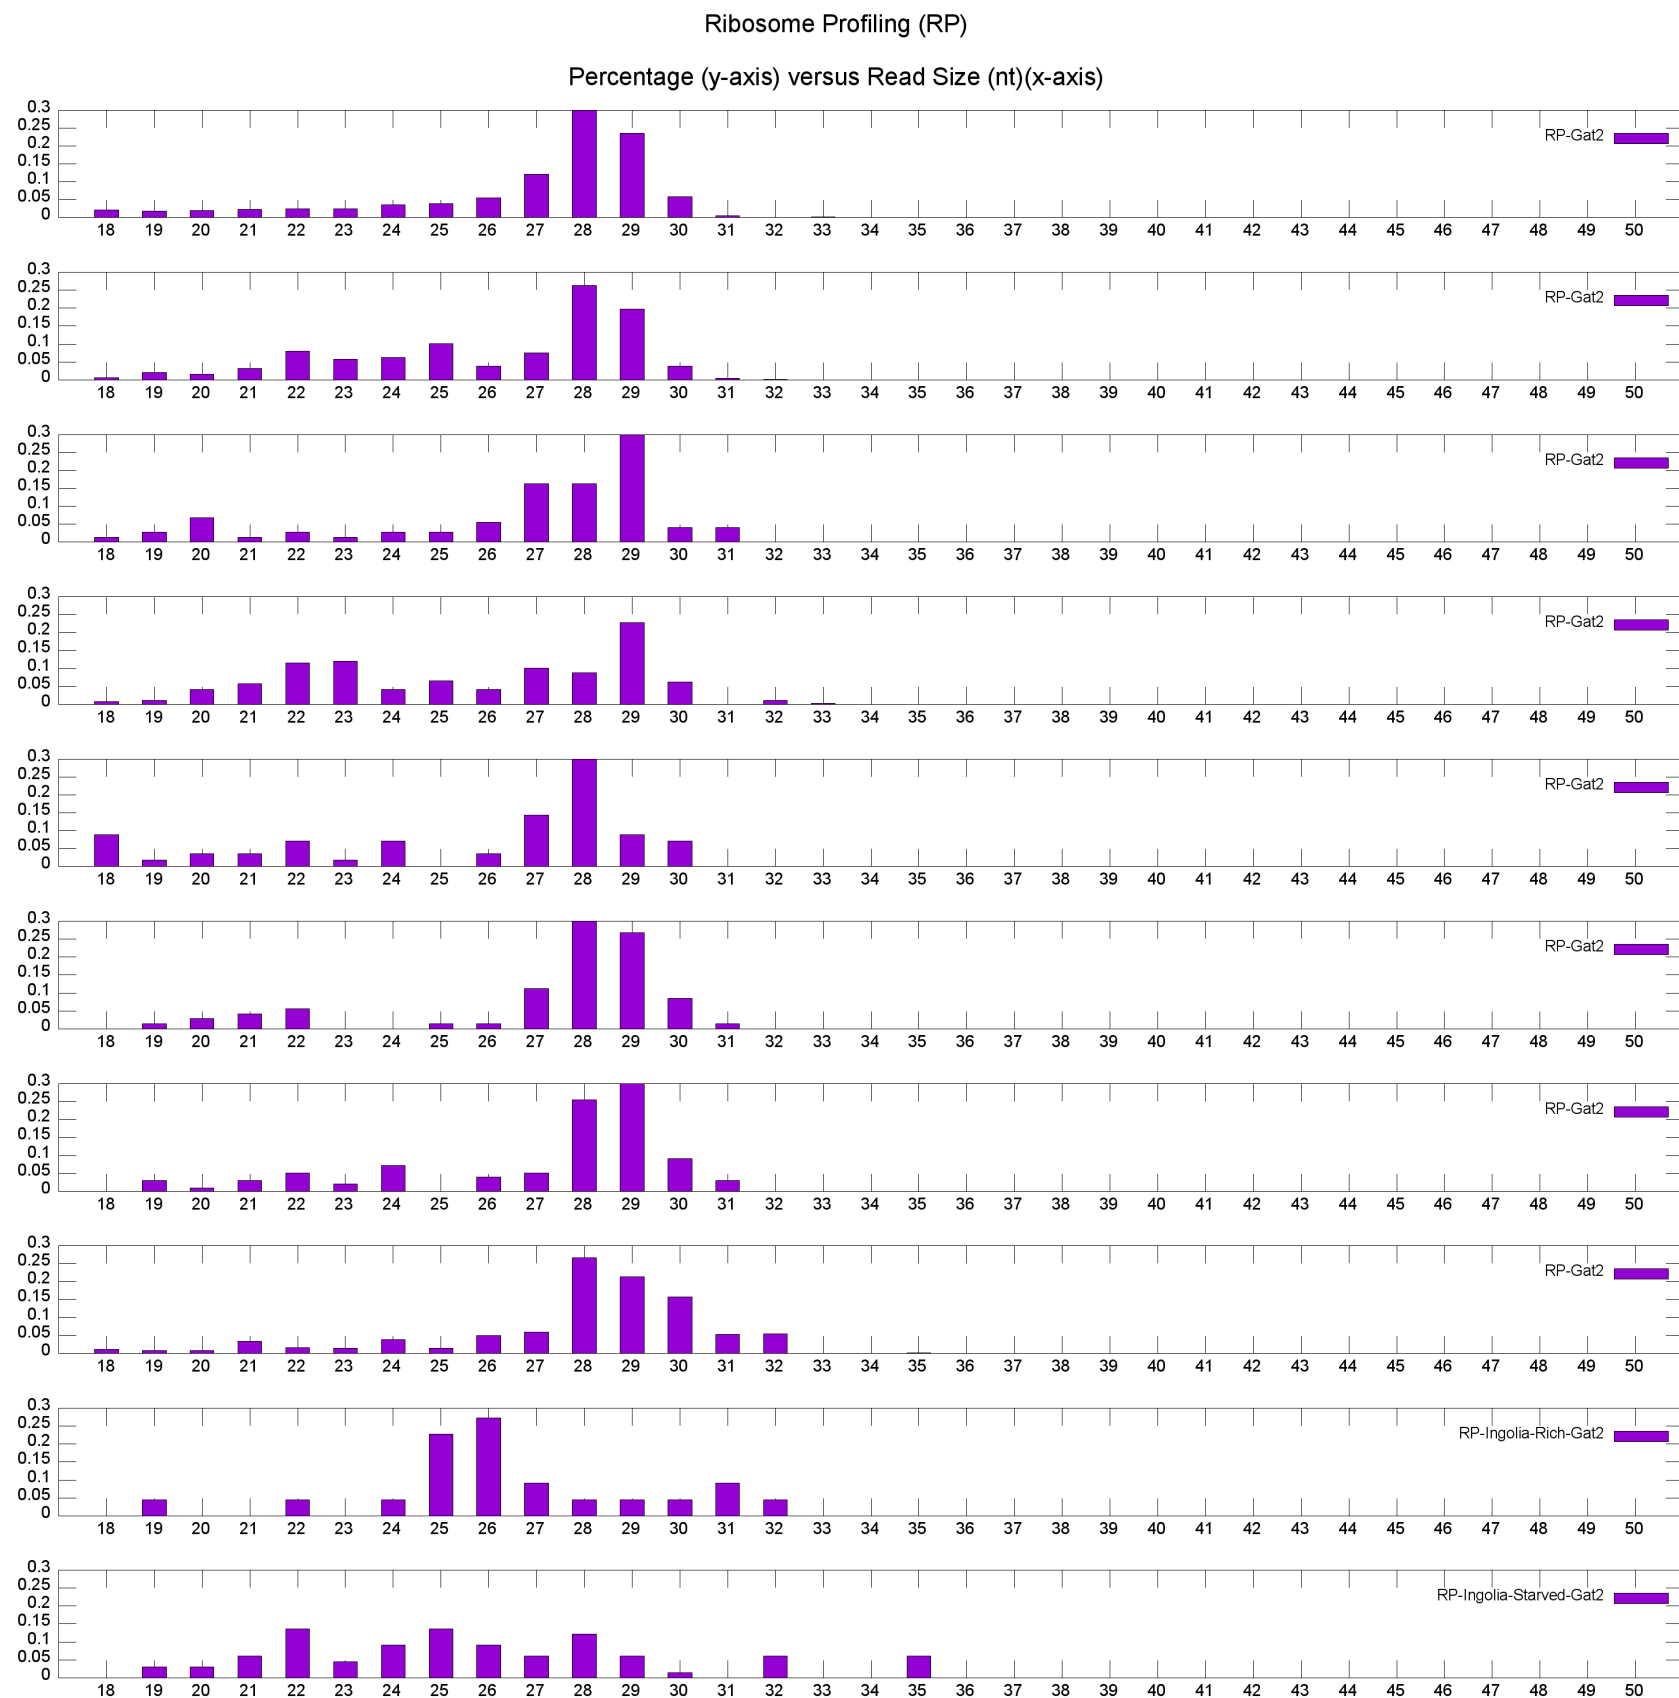

Figure 9: *GAT2* CDS Watson Reads Size Distribution (RP)

## 8 *GCV3* (Crick Strand)

### 8.1 Table 11: RP and TP Coverage (CDS)

CDS: ChrI:57950..58462 (512 bp)

| Experimental:      | Strand | Ribosome Profiling (RP) |          | Transcriptional Profiling (TP) |          |
|--------------------|--------|-------------------------|----------|--------------------------------|----------|
|                    |        | Number of Reads         | Coverage | Number of Reads                | Coverage |
| 1                  | Watson | 2                       | .074     | 160                            | 14.937   |
|                    | Crick  | 2276                    | 119.234  | 856                            | 78.460   |
| 2                  | Watson | 6                       | .232     | 55                             | 4.962    |
|                    | Crick  | 1408                    | 72.341   | 1415                           | 126.492  |
| 3                  | Watson | 1                       | .035     | 75                             | 6.849    |
|                    | Crick  | 340                     | 17.974   | 1903                           | 171.355  |
| 4                  | Watson | 6                       | .226     | 75                             | 6.808    |
|                    | Crick  | 1767                    | 92.855   | 1196                           | 107.787  |
| 5                  | Watson | 2                       | .076     | 35                             | 3.117    |
|                    | Crick  | 385                     | 19.458   | 1234                           | 111.179  |
| 6                  | Watson | 0                       | 0.00     | 88                             | 8.097    |
|                    | Crick  | 385                     | 20.638   | 1807                           | 161.476  |
| 7                  | Watson | 2                       | .072     | 129                            | 11.871   |
|                    | Crick  | 422                     | 22.226   | 2990                           | 273.955  |
| 8                  | Watson | 2                       | .072     | 108                            | 10.099   |
|                    | Crick  | 1402                    | 75.898   | 1173                           | 103.712  |
| Control (Ingolia): |        |                         |          |                                |          |
| Rich               | Watson | 1                       | .044     | 22                             | .978     |
|                    | Crick  | 490                     | 25.541   | 1808                           | 83.992   |
| Starved            | Watson | 2                       | .074     | 3                              | .105     |
|                    | Crick  | 1016                    | 51.451   | 1350                           | 63.576   |

## 8.2 *GCV3* CDS Read Size Distribution

Ribosome Profiling (RP)

Percentage (y-axis) versus Read Size (nt)(x-axis)

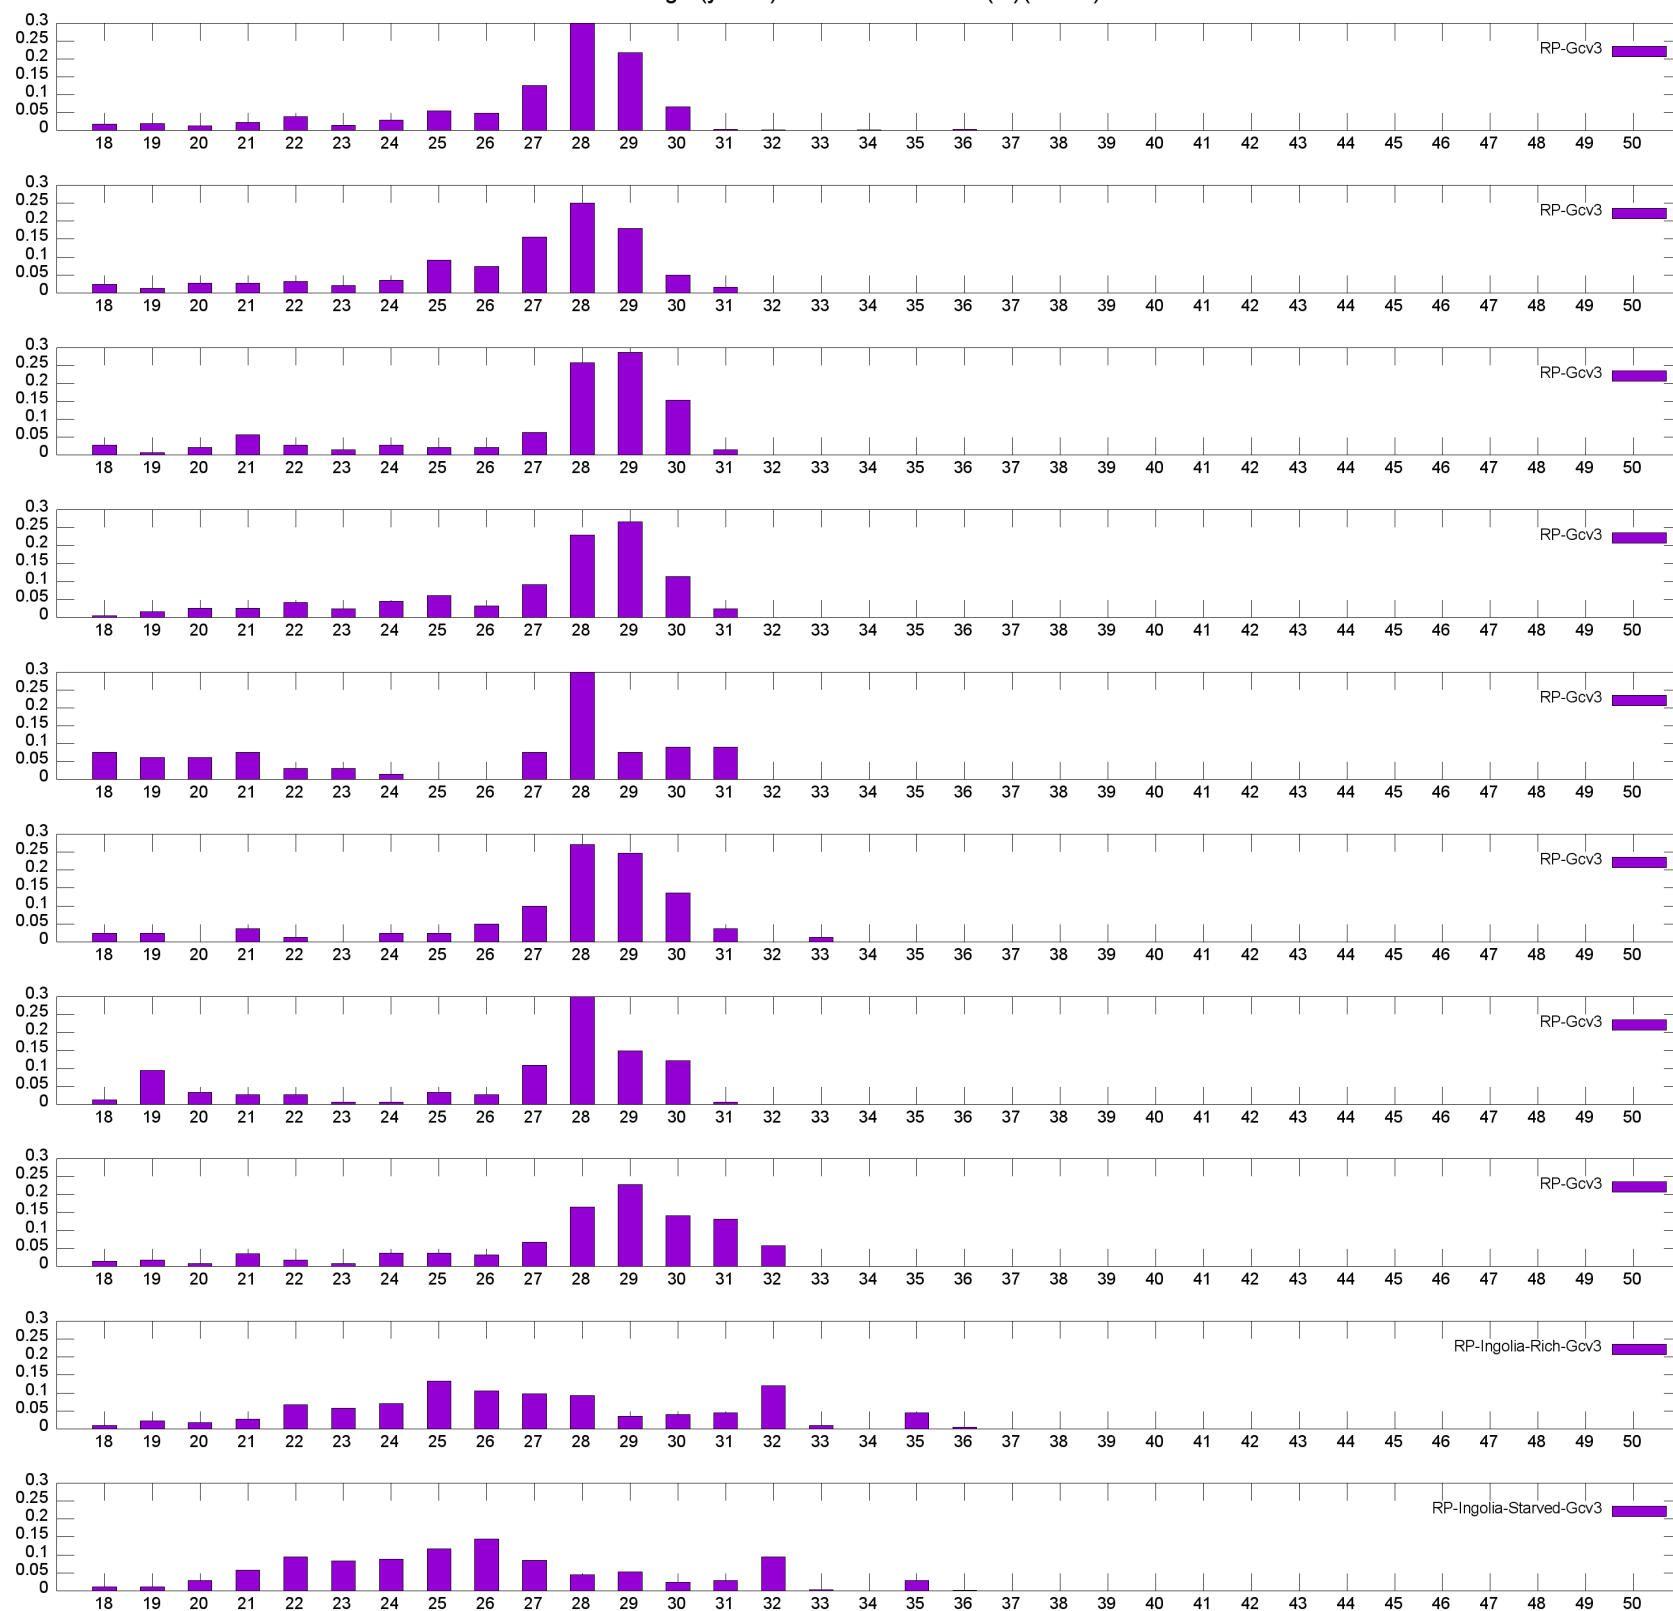

Figure 10: *GCV3* CDS Crick Reads Size Distribution (RP)

## 9 *GND1* (Watson Strand)

### 9.1 Table 12: RP and TP Coverage (CDS)

CDS: ChrVIII:470960..472429 (1469 bp)

| Experimental:      | Strand | Ribosome Profiling (RP) |          | Transcriptional Profiling (TP) |          |
|--------------------|--------|-------------------------|----------|--------------------------------|----------|
|                    |        | Number of Reads         | Coverage | Number of Reads                | Coverage |
| 1                  | Watson | 4722                    | 86.353   | 1864                           | 59.553   |
|                    | Crick  | 2                       | .025     | 65                             | 2.122    |
| 2                  | Watson | 4003                    | 71.579   | 1255                           | 39.409   |
|                    | Crick  | 1                       | .014     | 44                             | 1.448    |
| 3                  | Watson | 958                     | 17.775   | 1270                           | 40.281   |
|                    | Crick  | 1                       | .014     | 58                             | 1.875    |
| 4                  | Watson | 8574                    | 155.800  | 998                            | 31.489   |
|                    | Crick  | 7                       | .093     | 39                             | 1.258    |
| 5                  | Watson | 1612                    | 27.514   | 631                            | 20.110   |
|                    | Crick  | 0                       | 0.00     | 19                             | .632     |
| 6                  | Watson | 1214                    | 22.631   | 913                            | 28.886   |
|                    | Crick  | 0                       | 0.00     | 21                             | .691     |
| 7                  | Watson | 934                     | 16.560   | 1218                           | 39.006   |
|                    | Crick  | 0                       | 0.00     | 41                             | 1.331    |
| 8                  | Watson | 4123                    | 77.605   | 520                            | 16.493   |
|                    | Crick  | 54                      | .748     | 42                             | 1.351    |
| Control (Ingolia): |        |                         |          |                                |          |
| Rich               | Watson | 918                     | 16.870   | 1688                           | 27.923   |
|                    | Crick  | 0                       | 0.00     | 6                              | .089     |
| Starved            | Watson | 1289                    | 22.698   | 608                            | 9.987    |
|                    | Crick  | 0                       | 0.00     | 3                              | .039     |

## 9.2 *GND1* CDS Read Size Distribution

Ribosome Profiling (RP)

Percentage (y-axis) versus Read Size (nt)(x-axis)

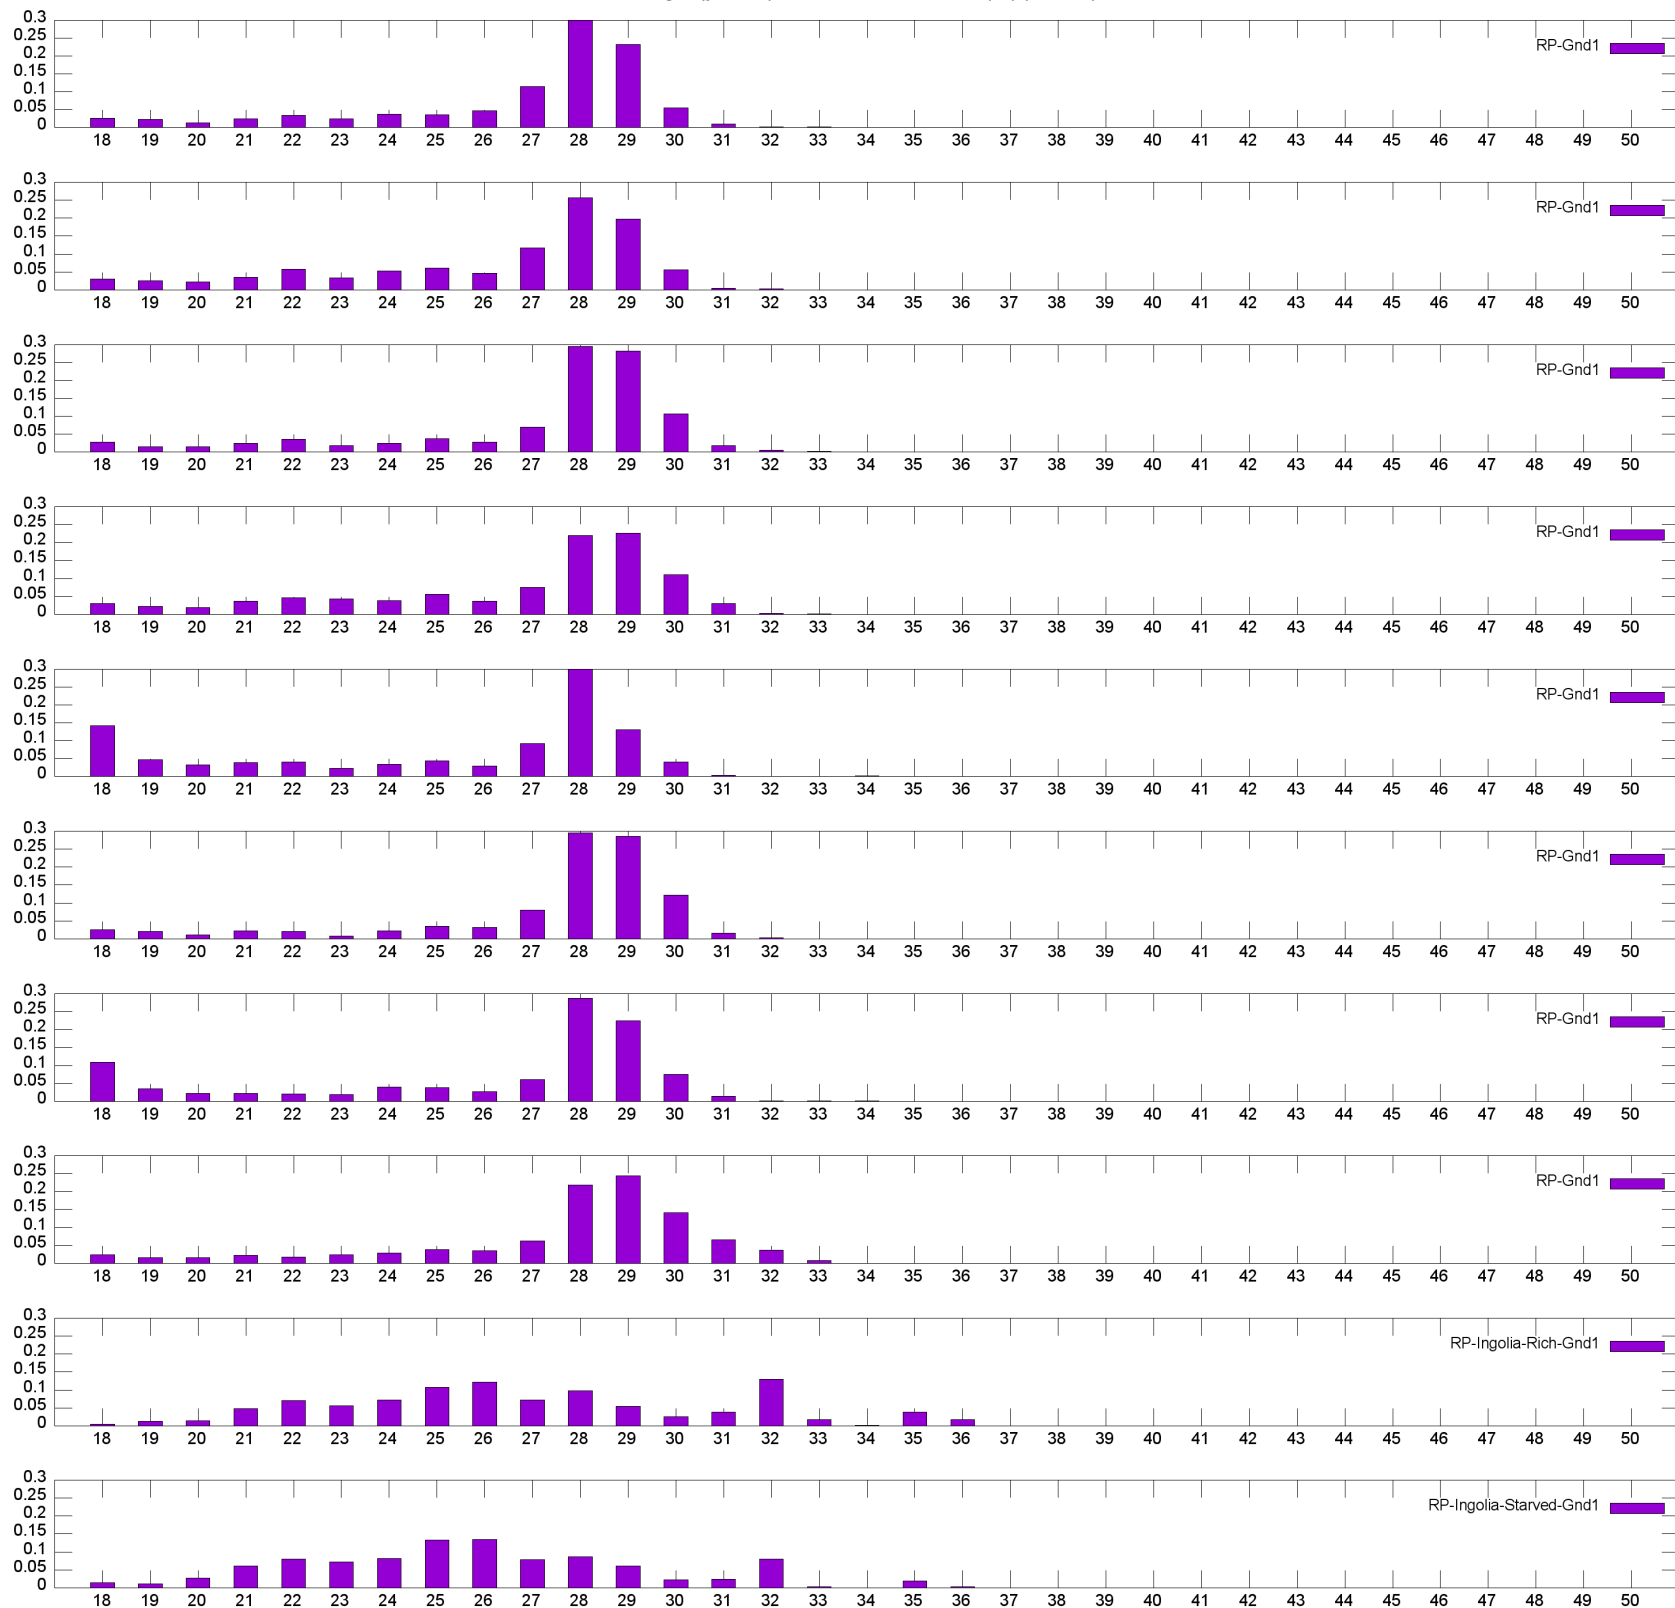

Figure 11: *GND1* CDS Watson Reads Size Distribution (RP)

## 10 *HHF1* (Crick Strand)

### 10.1 Table 13: RP and TP Coverage (CDS)

CDS: ChrII:255373..255684 (311 bp)

| Experimental:      | Strand | Ribosome Profiling (RP) |          | Transcriptional Profiling (TP) |          |
|--------------------|--------|-------------------------|----------|--------------------------------|----------|
|                    |        | Number of Reads         | Coverage | Number of Reads                | Coverage |
| 1                  | Watson | 8                       | .720     | 28                             | 4.302    |
|                    | Crick  | 760                     | 65.038   | 620                            | 91.900   |
| 2                  | Watson | 6                       | .511     | 21                             | 3.093    |
|                    | Crick  | 789                     | 67.405   | 1374                           | 201.061  |
| 3                  | Watson | 0                       | 0.00     | 81                             | 12.115   |
|                    | Crick  | 531                     | 46.231   | 2300                           | 338.816  |
| 4                  | Watson | 2                       | .141     | 265                            | 39.684   |
|                    | Crick  | 1834                    | 154.758  | 5599                           | 819.421  |
| 5                  | Watson | 3                       | .270     | 177                            | 26.205   |
|                    | Crick  | 408                     | 33.196   | 8981                           | 1327.652 |
| 6                  | Watson | 3                       | .215     | 275                            | 40.530   |
|                    | Crick  | 153                     | 13.408   | 11675                          | 1728.212 |
| 7                  | Watson | 7                       | .614     | 108                            | 16.218   |
|                    | Crick  | 699                     | 60.819   | 7487                           | 1119.292 |
| 8                  | Watson | 4                       | .344     | 153                            | 22.971   |
|                    | Crick  | 1197                    | 106.694  | 2320                           | 340.990  |
| Control (Ingolia): |        |                         |          |                                |          |
| Rich               | Watson | 1                       | .083     | 7                              | .553     |
|                    | Crick  | 532                     | 45.218   | 5617                           | 436.061  |
| Starved            | Watson | 2                       | .183     | 2                              | .176     |
|                    | Crick  | 463                     | 39.032   | 343                            | 26.434   |

## 10.2 *HHF1* CDS Read Size Distribution

Ribosome Profiling (RP)

Percentage (y-axis) versus Read Size (nt)(x-axis)

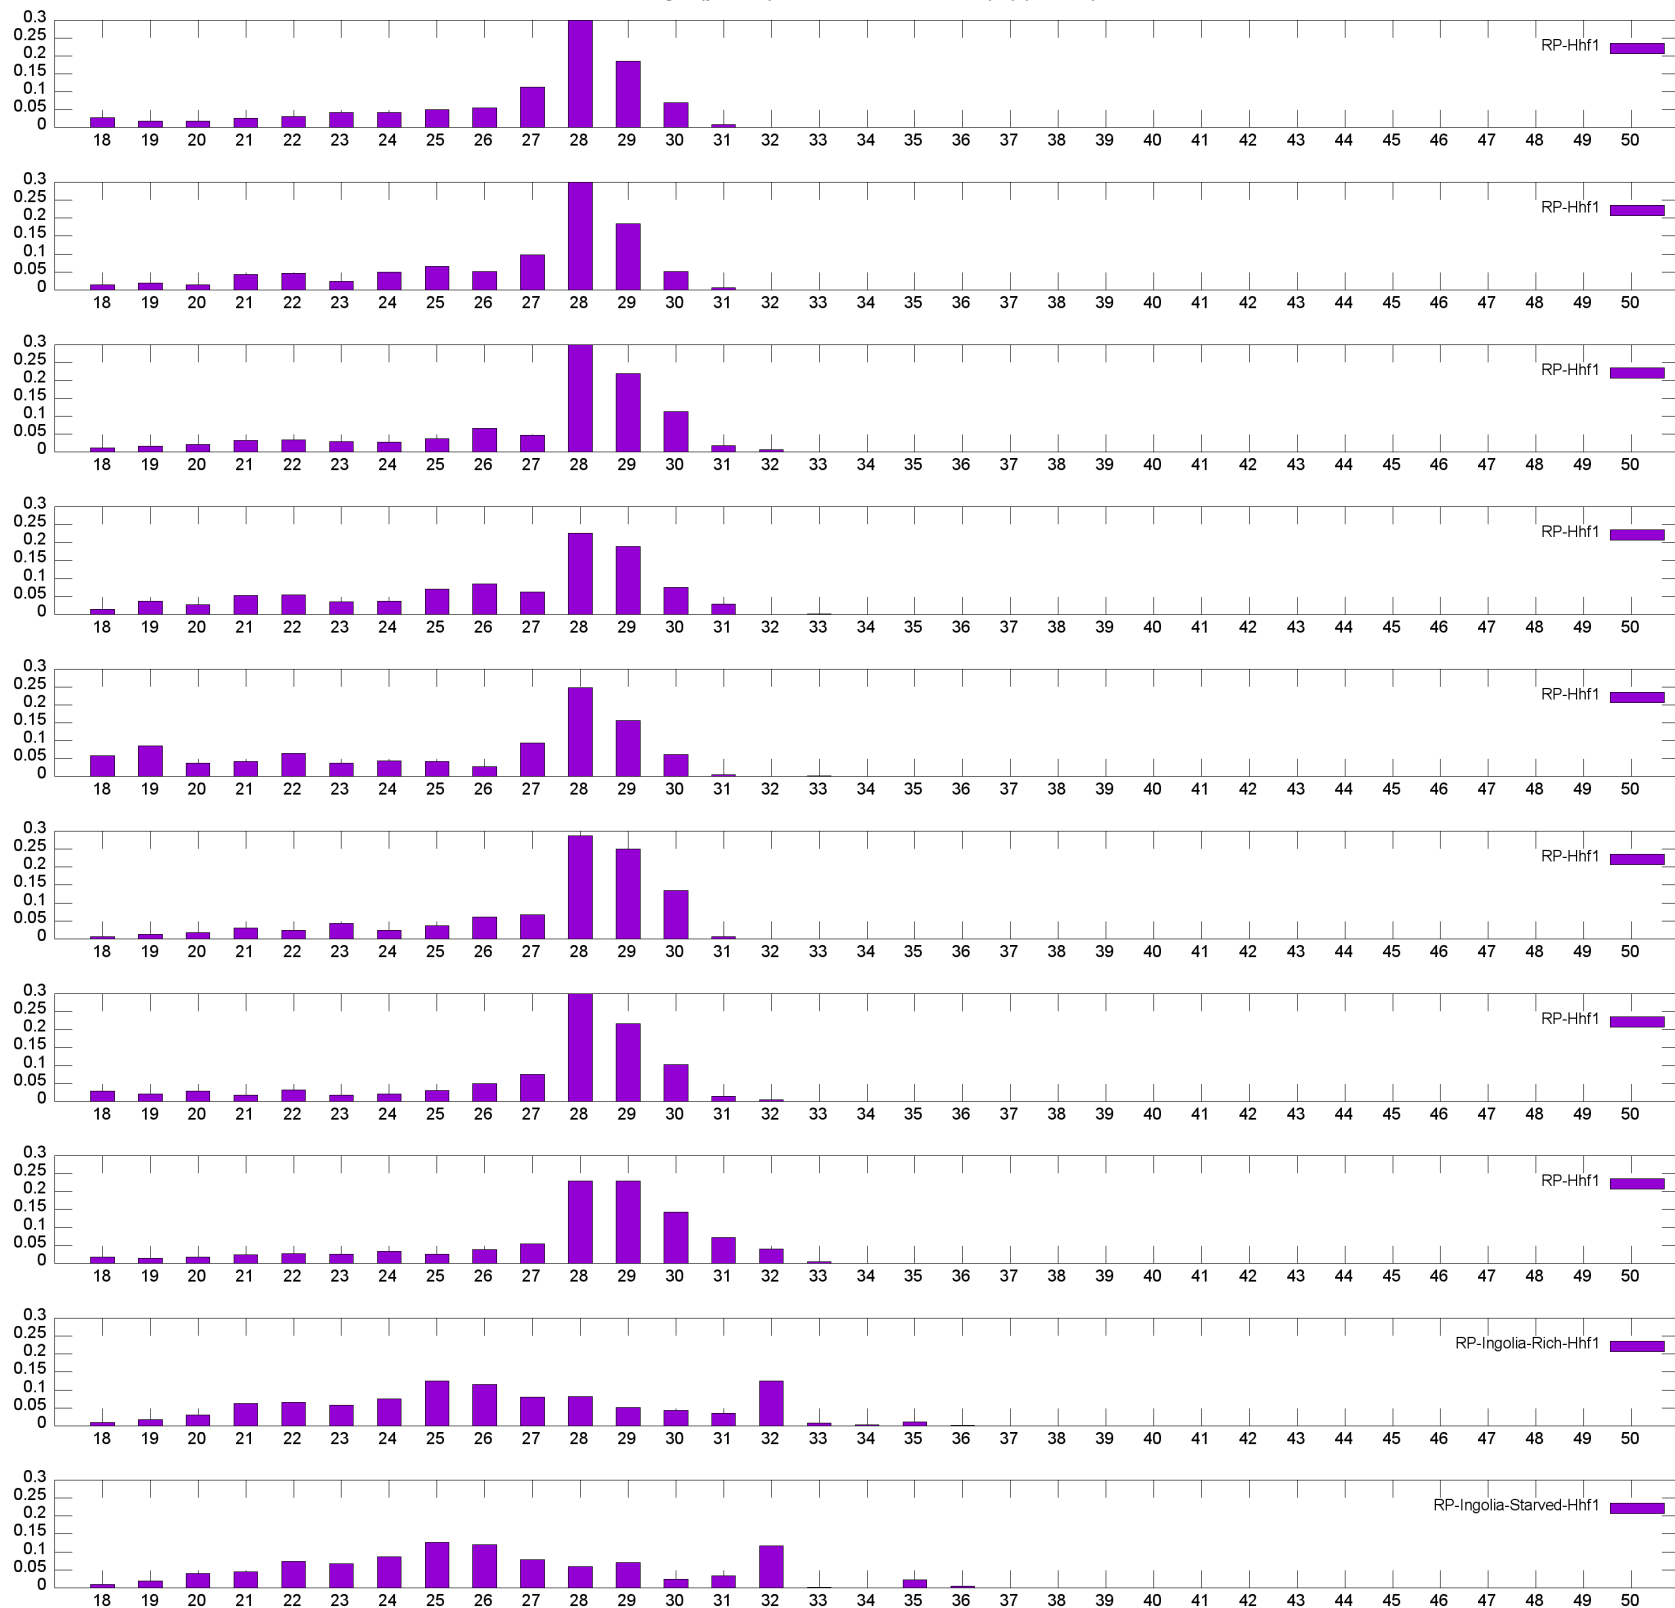

Figure 12: *HHF1* CDS Crick Reads Size Distribution (RP)

## 11 *MPS1* (Crick Strand)

### 11.1 Table 14: RP and TP Coverage (CDS)

CDS: ChrIV:400997..403291 (2294 bp)

| Experimental:      | Strand | Ribosome Profiling (RP) |          | Transcriptional Profiling (TP) |          |
|--------------------|--------|-------------------------|----------|--------------------------------|----------|
|                    |        | Number of Reads         | Coverage | Number of Reads                | Coverage |
| 1                  | Watson | 1                       | .007     | 39                             | .819     |
|                    | Crick  | 283                     | 2.683    | 442                            | 9.043    |
| 2                  | Watson | 2                       | .016     | 30                             | .595     |
|                    | Crick  | 90                      | .905     | 997                            | 19.870   |
| 3                  | Watson | 0                       | 0.00     | 41                             | .834     |
|                    | Crick  | 39                      | .433     | 1058                           | 21.165   |
| 4                  | Watson | 1                       | .007     | 39                             | .792     |
|                    | Crick  | 146                     | 1.649    | 1214                           | 24.256   |
| 5                  | Watson | 0                       | 0.00     | 13                             | .273     |
|                    | Crick  | 36                      | .390     | 1018                           | 20.396   |
| 6                  | Watson | 0                       | 0.00     | 58                             | 1.183    |
|                    | Crick  | 28                      | .307     | 1497                           | 30.223   |
| 7                  | Watson | 0                       | 0.00     | 67                             | 1.395    |
|                    | Crick  | 47                      | .509     | 1156                           | 23.814   |
| 8                  | Watson | 0                       | 0.00     | 31                             | .618     |
|                    | Crick  | 105                     | 1.193    | 827                            | 16.603   |
| Control (Ingolia): |        |                         |          |                                |          |
| Rich               | Watson | 0                       | 0.00     | 3                              | .028     |
|                    | Crick  | 25                      | .284     | 185                            | 1.965    |
| Starved            | Watson | 0                       | 0.00     | 0                              | 0.00     |
|                    | Crick  | 40                      | .466     | 45                             | .465     |



## 11.2 *MPS1* CDS Read Size Distribution

Ribosome Profiling (RP)

Percentage (y-axis) versus Read Size (nt)(x-axis)

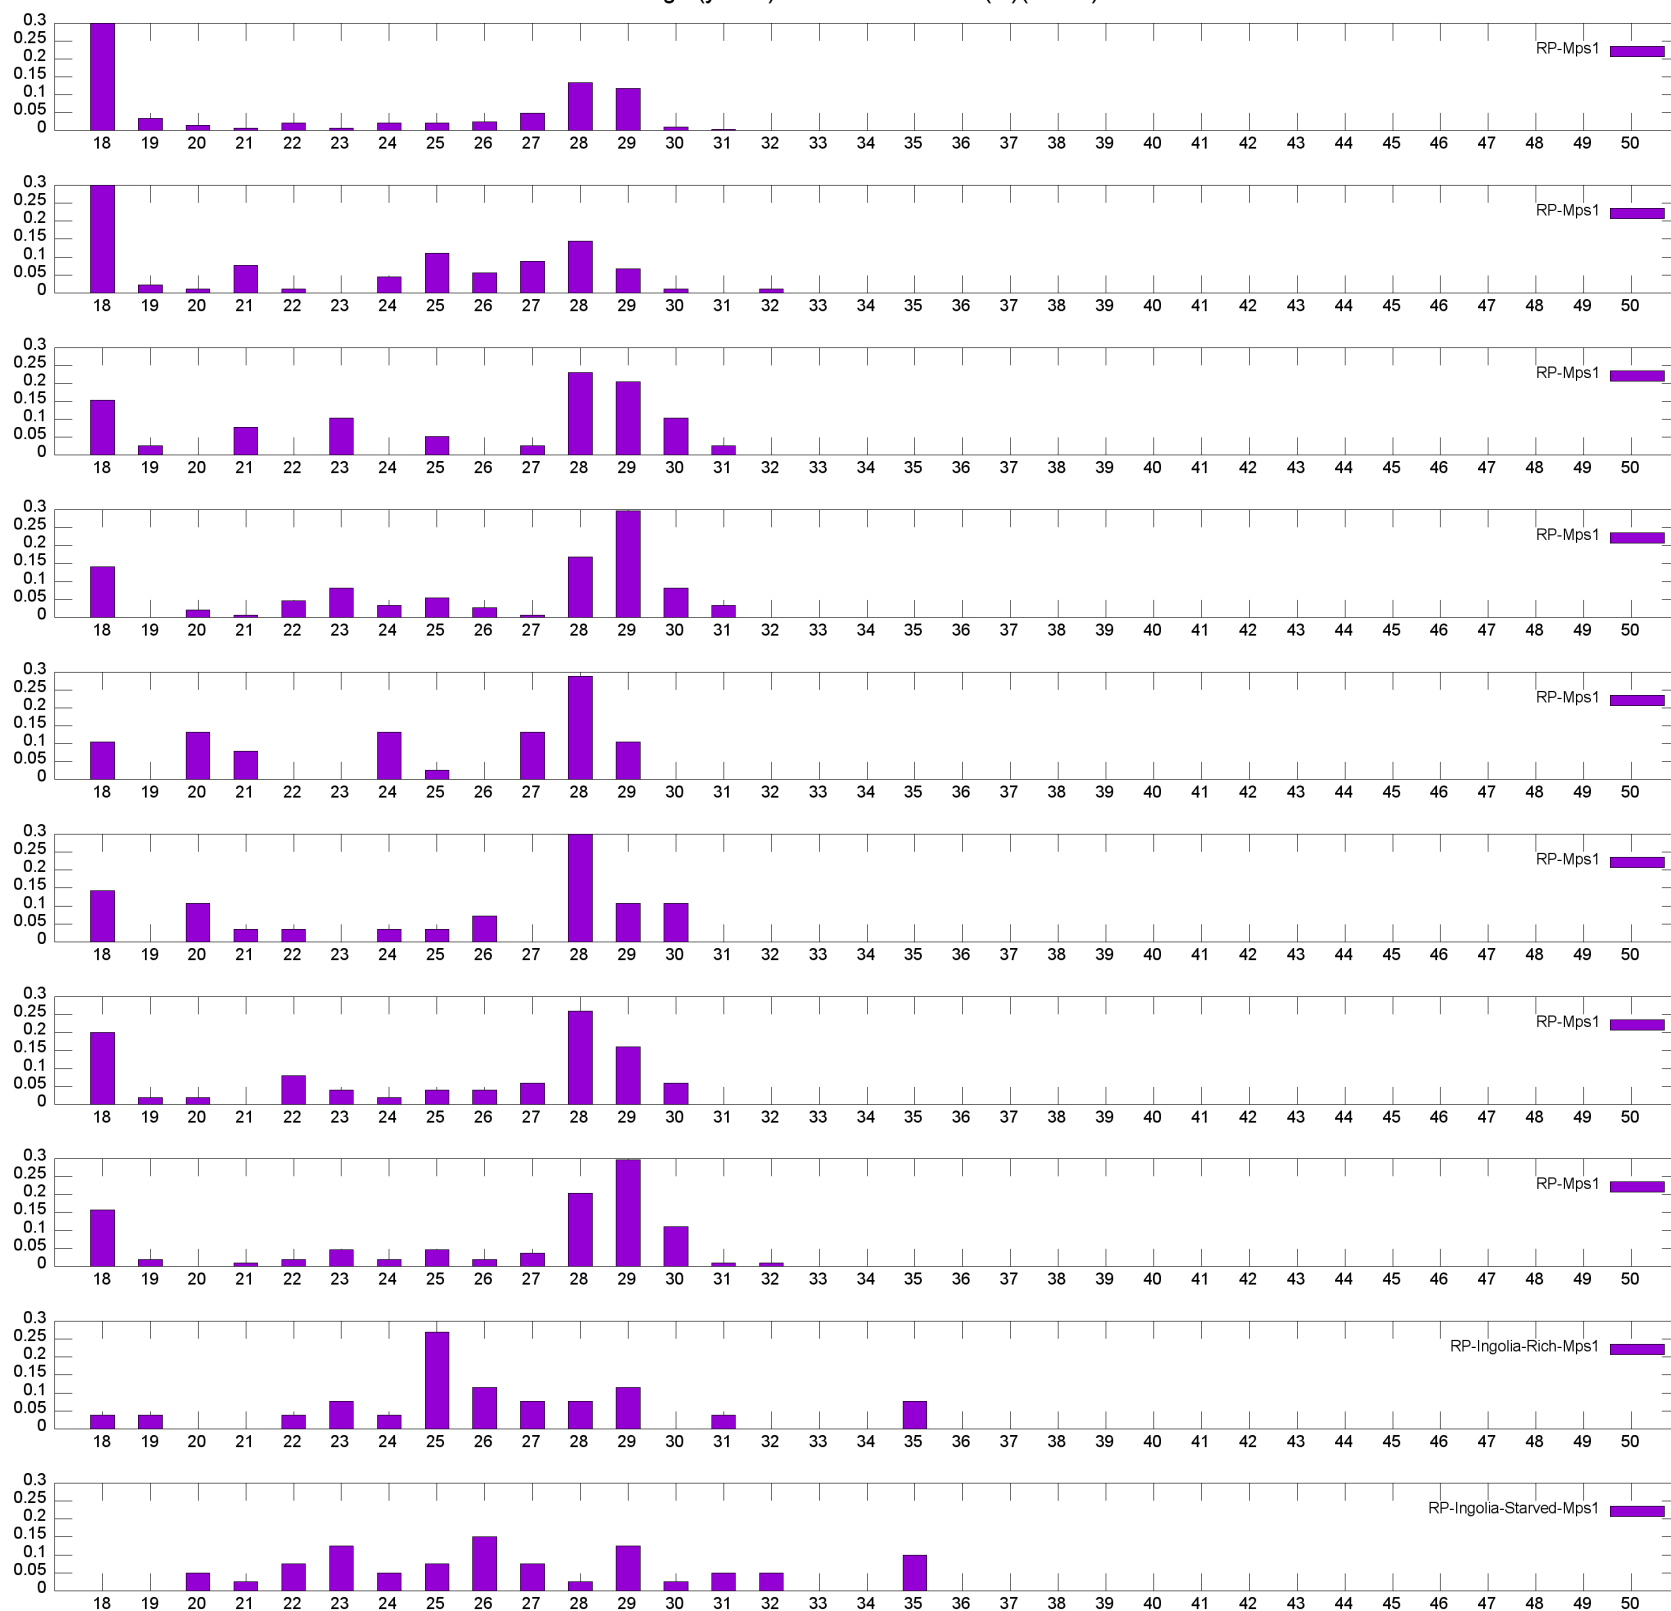

Figure 13: *MPS1* CDS Crick Reads Size Distribution (RP)

## 12 *MSC1* (Crick Strand)

### 12.1 Table 15: RP and TP Coverage (CDS)

CDS: ChrXIII:15135..16676 (1541 bp)

| Experimental:      | Strand | Ribosome Profiling (RP) |          | Transcriptional Profiling (TP) |          |
|--------------------|--------|-------------------------|----------|--------------------------------|----------|
|                    |        | Number of Reads         | Coverage | Number of Reads                | Coverage |
| 1                  | Watson | 10                      | .151     | 118                            | 3.572    |
|                    | Crick  | 903                     | 15.726   | 1746                           | 53.791   |
| 2                  | Watson | 5                       | .075     | 80                             | 2.292    |
|                    | Crick  | 977                     | 16.728   | 2701                           | 81.744   |
| 3                  | Watson | 2                       | .027     | 192                            | 5.828    |
|                    | Crick  | 361                     | 6.154    | 6950                           | 211.451  |
| 4                  | Watson | 20                      | .313     | 137                            | 4.138    |
|                    | Crick  | 3064                    | 53.199   | 3390                           | 102.968  |
| 5                  | Watson | 4                       | .052     | 39                             | 1.157    |
|                    | Crick  | 1806                    | 30.214   | 3948                           | 120.262  |
| 6                  | Watson | 5                       | .083     | 26                             | .687     |
|                    | Crick  | 3623                    | 64.798   | 1584                           | 48.296   |
| 7                  | Watson | 4                       | .068     | 36                             | 1.071    |
|                    | Crick  | 372                     | 6.470    | 2386                           | 73.232   |
| 8                  | Watson | 7                       | .112     | 45                             | 1.348    |
|                    | Crick  | 1374                    | 24.730   | 688                            | 20.929   |
| Control (Ingolia): |        |                         |          |                                |          |
| Rich               | Watson | 2                       | .031     | 17                             | .265     |
|                    | Crick  | 6                       | .101     | 207                            | 3.205    |
| Starved            | Watson | 0                       | 0.00     | 3                              | .040     |
|                    | Crick  | 1017                    | 17.294   | 613                            | 9.963    |

## 12.2 *MSC1* CDS Read Size Distribution

Ribosome Profiling (RP)

Percentage (y-axis) versus Read Size (nt)(x-axis)

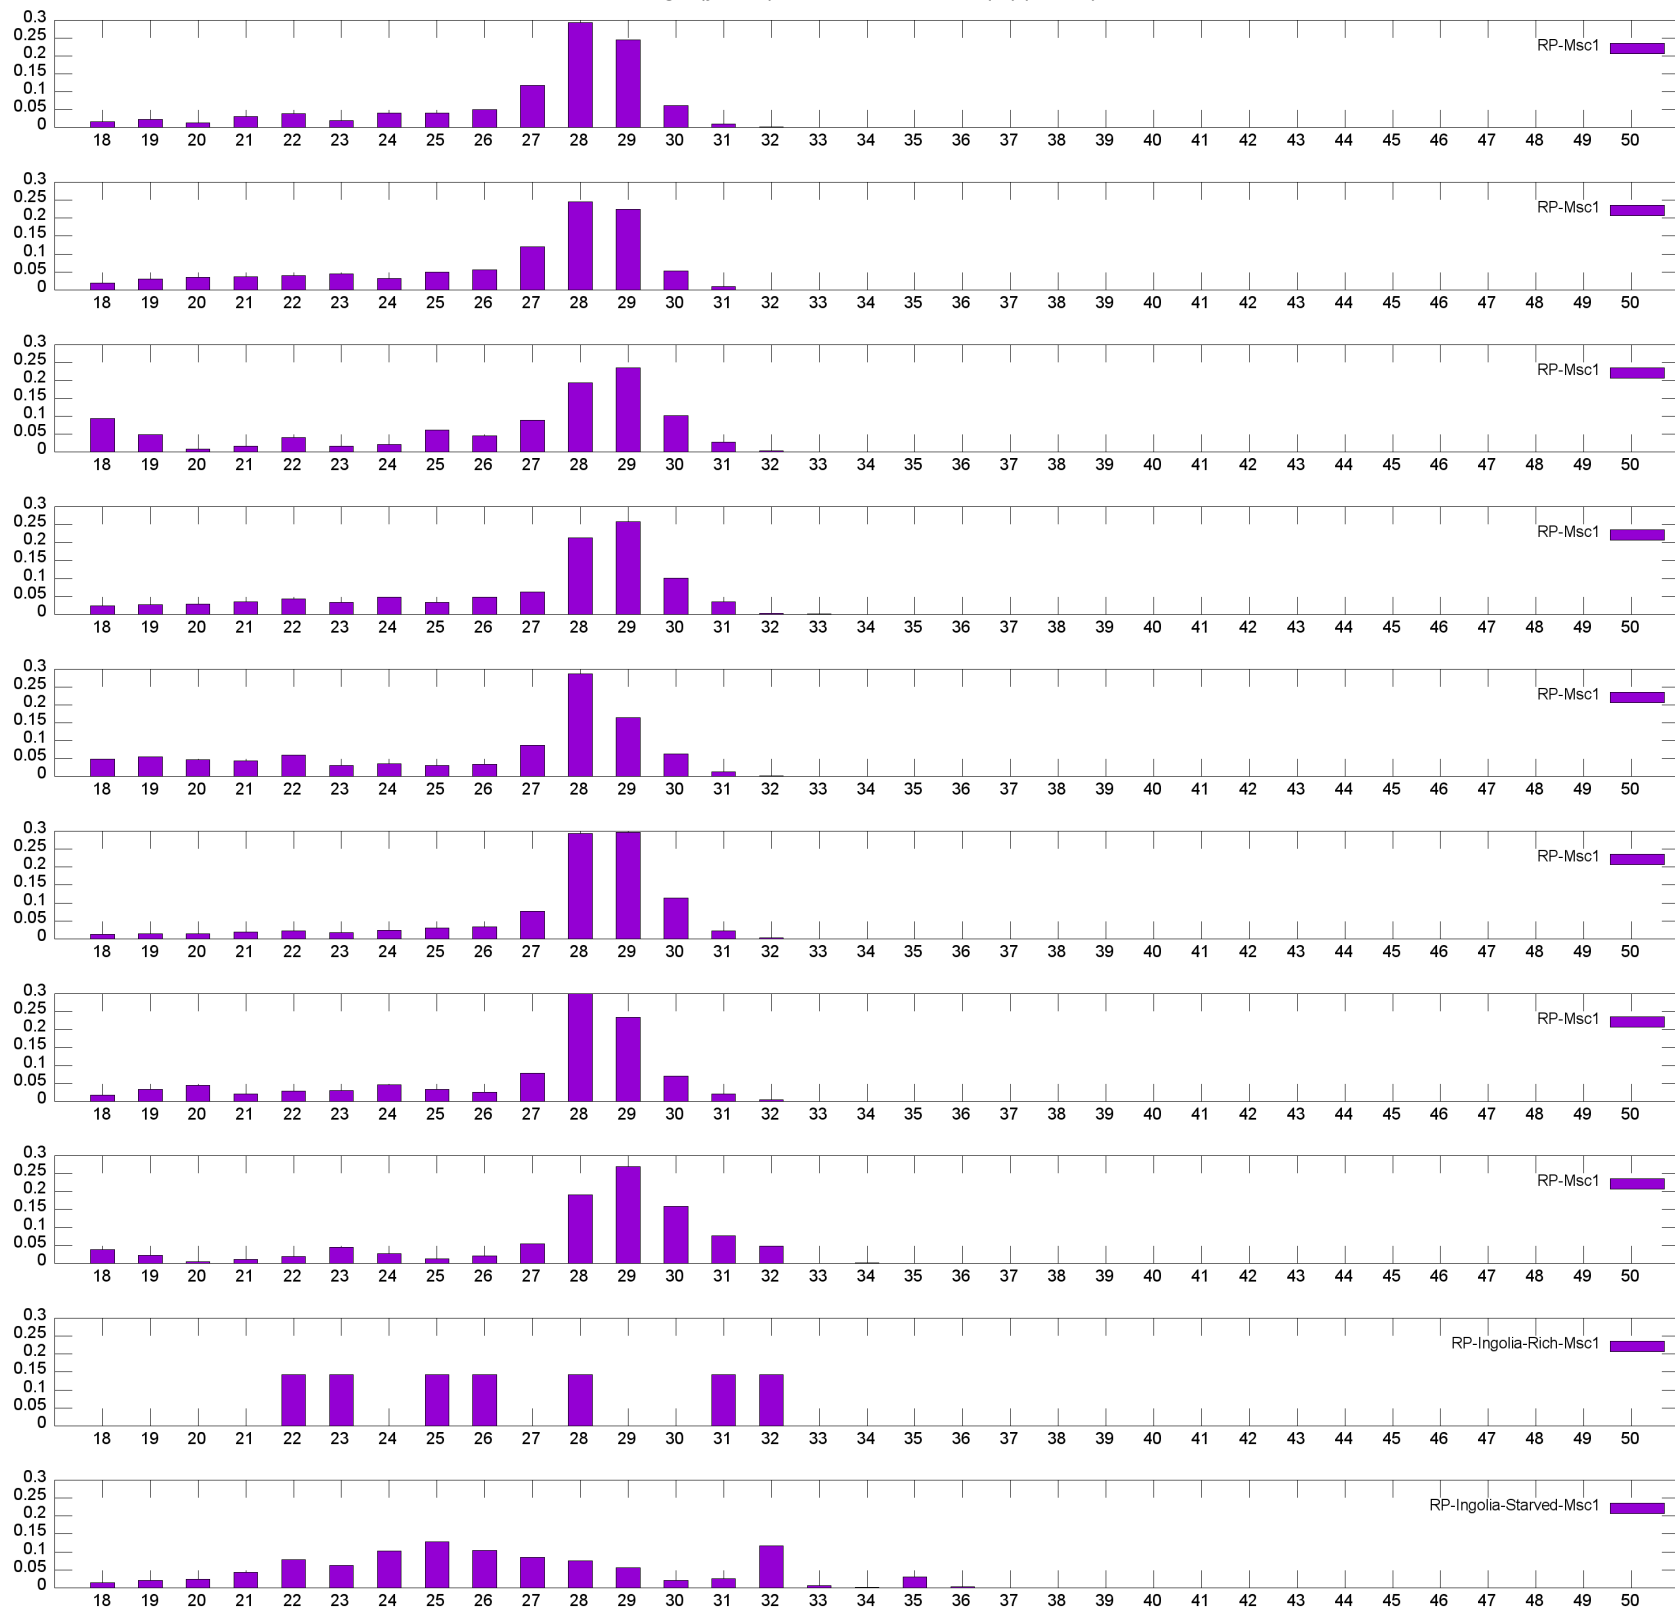

Figure 14: *MSC1* CDS Crick Reads Size Distribution (RP)

### 13 *NQM1* (Crick Strand)

#### 13.1 Table 16: RP and TP Coverage (CDS)

CDS: ChrVII:580435..581436 (1001 bp)

| Experimental:      | Strand | Ribosome Profiling (RP) |          | Transcriptional Profiling (TP) |          |
|--------------------|--------|-------------------------|----------|--------------------------------|----------|
|                    |        | Number of Reads         | Coverage | Number of Reads                | Coverage |
| 1                  | Watson | 32                      | .603     | 55                             | 2.564    |
|                    | Crick  | 78                      | 2.131    | 362                            | 16.961   |
| 2                  | Watson | 10                      | .179     | 41                             | 1.814    |
|                    | Crick  | 123                     | 3.332    | 681                            | 31.436   |
| 3                  | Watson | 4                       | .071     | 298                            | 13.700   |
|                    | Crick  | 41                      | 1.130    | 5268                           | 245.445  |
| 4                  | Watson | 44                      | .794     | 219                            | 9.936    |
|                    | Crick  | 343                     | 9.156    | 2197                           | 102.013  |
| 5                  | Watson | 94                      | 1.691    | 53                             | 2.367    |
|                    | Crick  | 162                     | 4.205    | 2247                           | 105.074  |
| 6                  | Watson | 3                       | .053     | 41                             | 1.919    |
|                    | Crick  | 578                     | 15.888   | 892                            | 41.498   |
| 7                  | Watson | 38                      | .684     | 61                             | 2.898    |
|                    | Crick  | 52                      | 1.389    | 611                            | 28.764   |
| 8                  | Watson | 55                      | .989     | 12                             | .556     |
|                    | Crick  | 206                     | 5.648    | 325                            | 15.037   |
| Control (Ingolia): |        |                         |          |                                |          |
| Rich               | Watson | 0                       | 0.00     | 6                              | .125     |
|                    | Crick  | 0                       | 0.00     | 55                             | 1.312    |
| Starved            | Watson | 0                       | 0.00     | 14                             | .280     |
|                    | Crick  | 83                      | 2.185    | 106                            | 2.649    |

## 13.2 *NQM1* CDS Read Size Distribution

Ribosome Profiling (RP)

Percentage (y-axis) versus Read Size (nt)(x-axis)

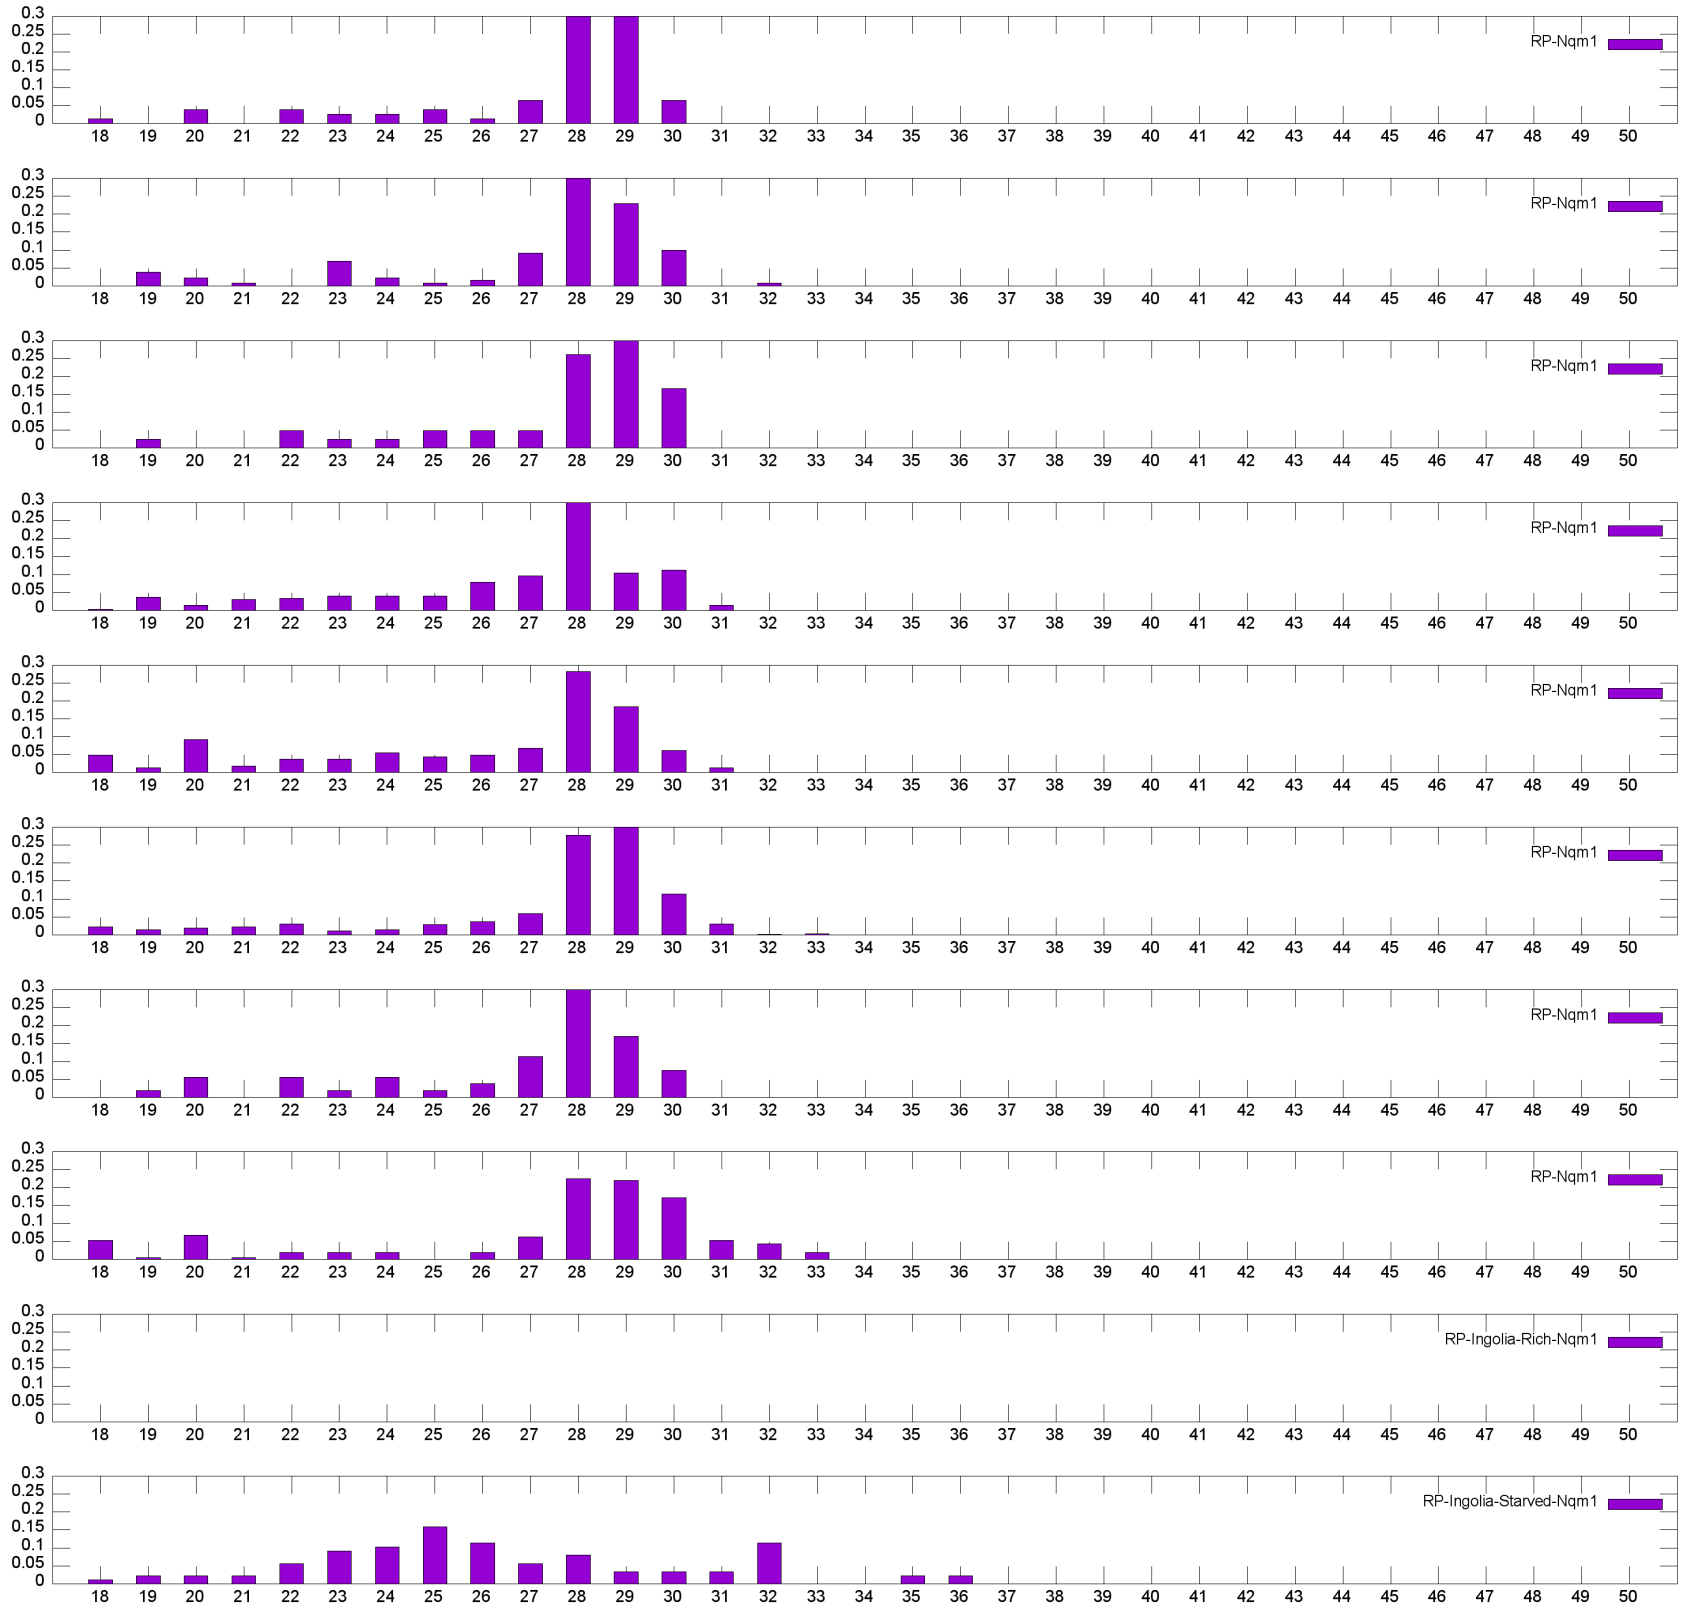

Figure 15: *NQM1* CDS Crick Reads Size Distribution (RP)

## 14 *PCT1* (Crick Strand)

### 14.1 Table 17: RP and TP Coverage (CDS)

CDS: ChrVII:903474..904748 (1274 bp)

| Experimental:      | Strand | Ribosome Profiling (RP) |          | Transcriptional Profiling (TP) |          |
|--------------------|--------|-------------------------|----------|--------------------------------|----------|
|                    |        | Number of Reads         | Coverage | Number of Reads                | Coverage |
| 1                  | Watson | 2                       | .028     | 42                             | 1.559    |
|                    | Crick  | 432                     | 9.043    | 265                            | 9.809    |
| 2                  | Watson | 0                       | 0.00     | 15                             | .544     |
|                    | Crick  | 387                     | 7.916    | 630                            | 22.964   |
| 3                  | Watson | 0                       | 0.00     | 39                             | 1.415    |
|                    | Crick  | 45                      | .914     | 787                            | 28.598   |
| 4                  | Watson | 4                       | .059     | 42                             | 1.569    |
|                    | Crick  | 323                     | 6.835    | 825                            | 30.107   |
| 5                  | Watson | 1                       | .014     | 19                             | .667     |
|                    | Crick  | 46                      | .898     | 553                            | 20.210   |
| 6                  | Watson | 1                       | .014     | 23                             | .819     |
|                    | Crick  | 38                      | .816     | 629                            | 22.824   |
| 7                  | Watson | 0                       | 0.00     | 47                             | 1.657    |
|                    | Crick  | 70                      | 1.437    | 856                            | 31.631   |
| 8                  | Watson | 0                       | 0.00     | 52                             | 1.864    |
|                    | Crick  | 226                     | 4.940    | 762                            | 27.623   |
| Control (Ingolia): |        |                         |          |                                |          |
| Rich               | Watson | 0                       | 0.00     | 5                              | .094     |
|                    | Crick  | 41                      | .895     | 372                            | 6.959    |
| Starved            | Watson | 0                       | 0.00     | 1                              | .016     |
|                    | Crick  | 105                     | 2.208    | 108                            | 2.100    |

14.2 *PCT1* (Crick Strand) CDS Read Size Distribution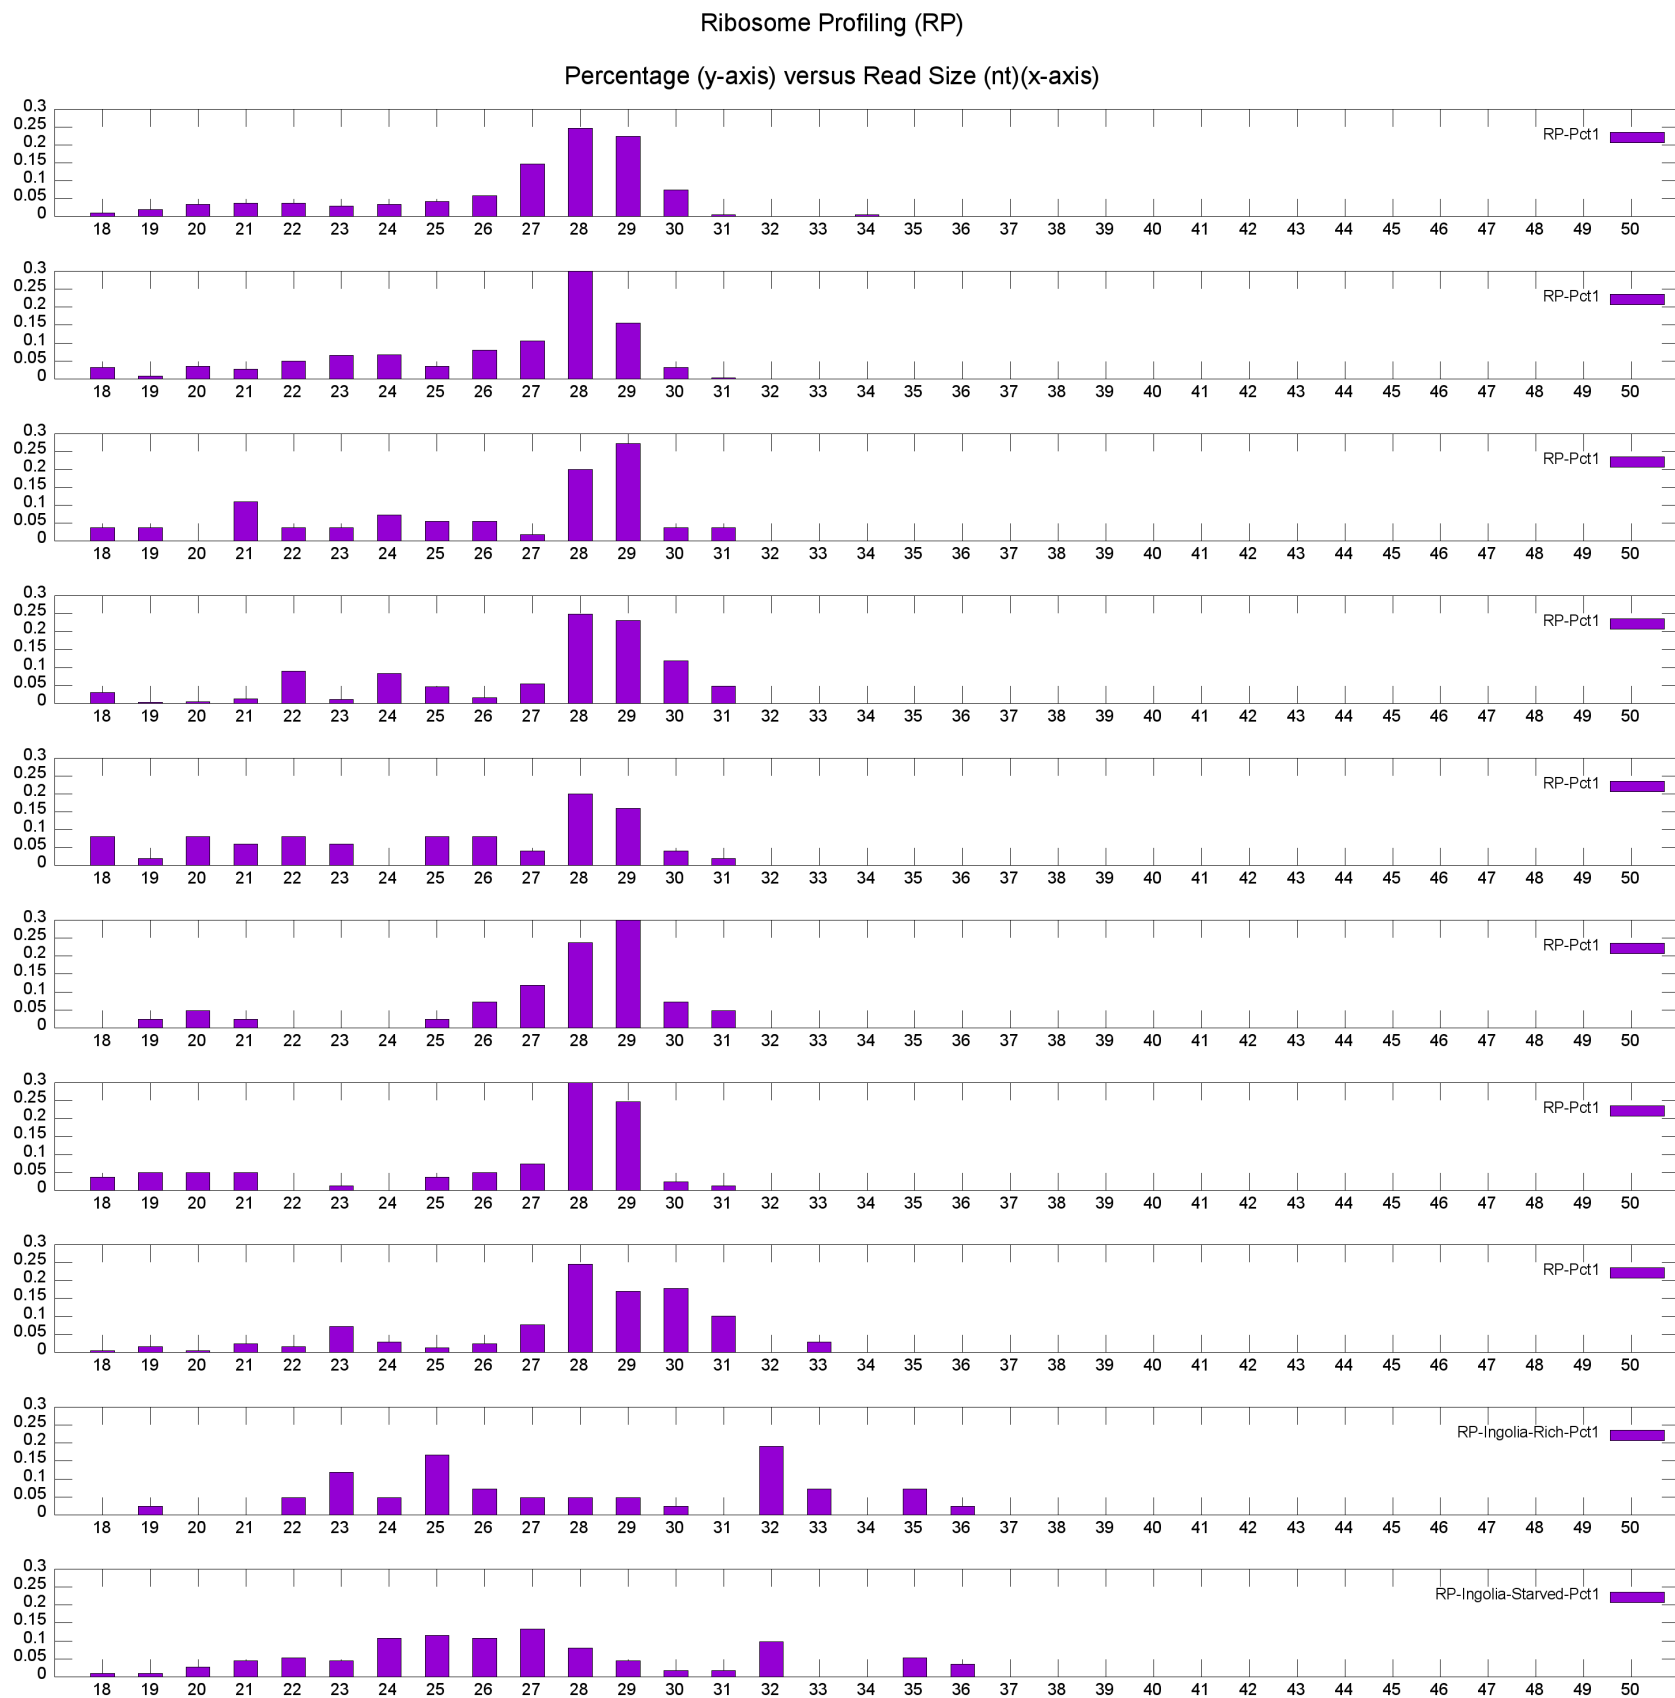Figure 16: *PCT1* CDS Crick Reads Size Distribution (RP)

## 15 *RTN2* (Watson Strand)

### 15.1 Table 18: RP and TP Coverage (CDS)

CDS: ChrIV:94605..95786 (1181 bp)

| Experimental:      | Strand | Ribosome Profiling (RP) |          | Transcriptional Profiling (TP) |          |
|--------------------|--------|-------------------------|----------|--------------------------------|----------|
|                    |        | Number of Reads         | Coverage | Number of Reads                | Coverage |
| 1                  | Watson | 201                     | 4.536    | 370                            | 14.755   |
|                    | Crick  | 33                      | .503     | 63                             | 2.433    |
| 2                  | Watson | 272                     | 5.972    | 958                            | 37.486   |
|                    | Crick  | 21                      | .320     | 75                             | 2.961    |
| 3                  | Watson | 94                      | 2.093    | 3997                           | 157.508  |
|                    | Crick  | 12                      | .182     | 200                            | 7.893    |
| 4                  | Watson | 852                     | 19.054   | 2488                           | 97.808   |
|                    | Crick  | 91                      | 1.386    | 196                            | 7.731    |
| 5                  | Watson | 588                     | 12.743   | 2247                           | 88.870   |
|                    | Crick  | 263                     | 4.010    | 22                             | .791     |
| 6                  | Watson | 1309                    | 30.558   | 594                            | 23.303   |
|                    | Crick  | 5                       | .076     | 28                             | 1.061    |
| 7                  | Watson | 83                      | 1.887    | 1051                           | 42.035   |
|                    | Crick  | 139                     | 2.119    | 53                             | 2.141    |
| 8                  | Watson | 331                     | 7.678    | 424                            | 16.723   |
|                    | Crick  | 43                      | .655     | 37                             | 1.480    |
| Control (Ingolia): |        |                         |          |                                |          |
| Rich               | Watson | 1                       | .023     | 59                             | 1.176    |
|                    | Crick  | 0                       | 0.00     | 1                              | .015     |
| Starved            | Watson | 98                      | 2.206    | 20                             | .411     |
|                    | Crick  | 0                       | 0.00     | 0                              | 0.00     |



## 15.2 *RTN2* CDS Read Size Distribution

Ribosome Profiling (RP)

Percentage (y-axis) versus Read Size (nt)(x-axis)

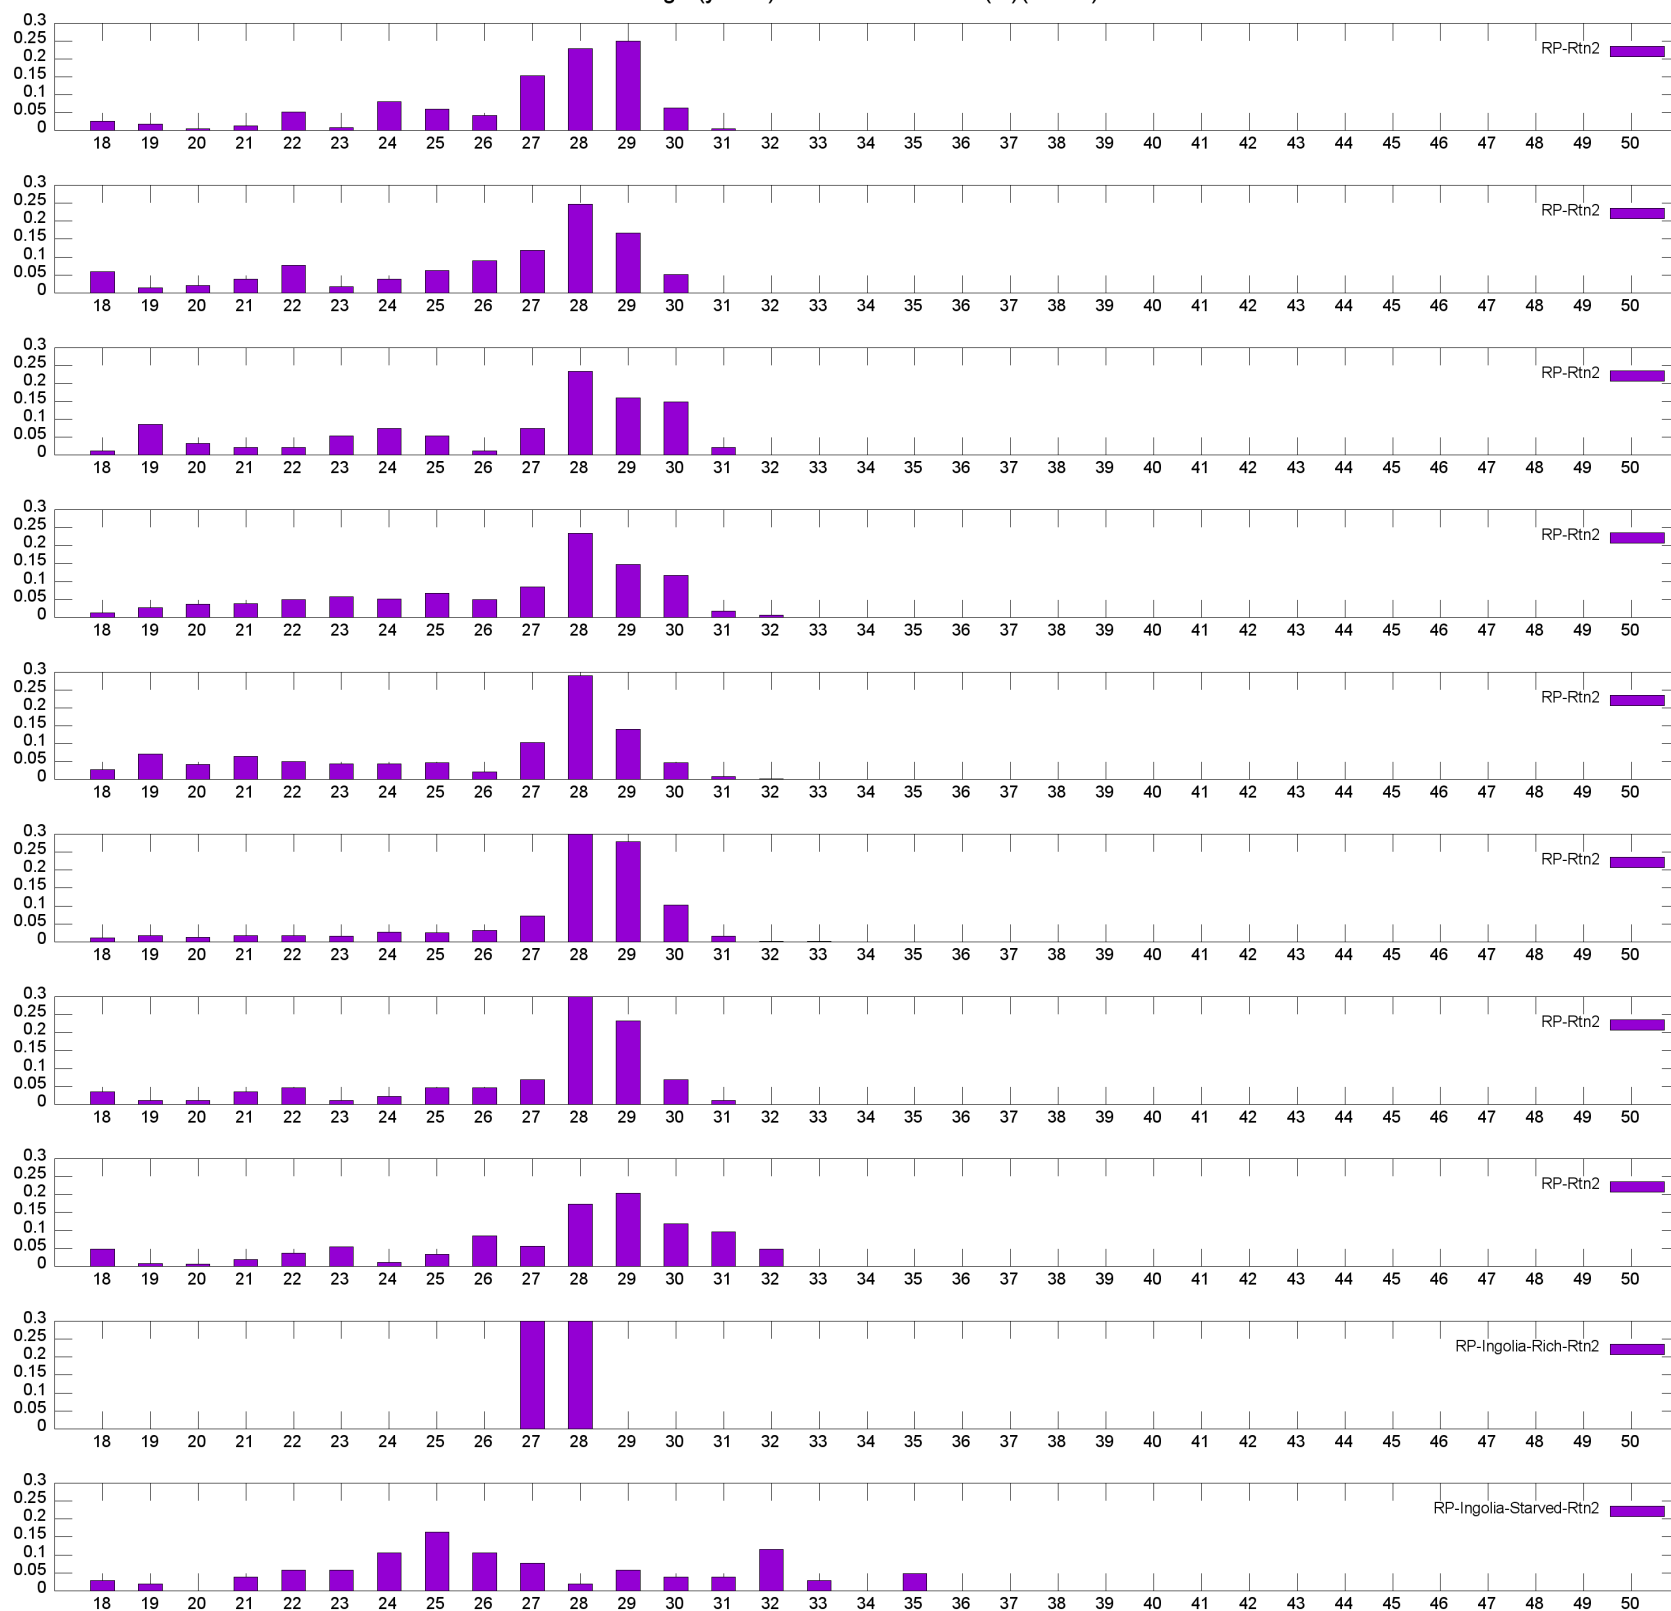

Figure 17: *RTN2* CDS Watson Reads Size Distribution (RP)

## 16 *TIP1* (Crick Strand)

### 16.1 Table 19: RP and TP Coverage (CDS)

CDS: ChrII:372103..372735 (632 bp)

| Experimental:      | Strand | Ribosome Profiling (RP) |          | Transcriptional Profiling (TP) |          |
|--------------------|--------|-------------------------|----------|--------------------------------|----------|
|                    |        | Number of Reads         | Coverage | Number of Reads                | Coverage |
| 1                  | Watson | 2                       | .061     | 170                            | 12.704   |
|                    | Crick  | 28950                   | 1242.158 | 2798                           | 208.827  |
| 2                  | Watson | 0                       | 0.00     | 88                             | 6.542    |
|                    | Crick  | 20662                   | 866.569  | 2658                           | 194.045  |
| 3                  | Watson | 0                       | 0.00     | 72                             | 5.305    |
|                    | Crick  | 479                     | 20.096   | 1330                           | 97.743   |
| 4                  | Watson | 1                       | .031     | 114                            | 8.034    |
|                    | Crick  | 24816                   | 1058.814 | 1547                           | 113.952  |
| 5                  | Watson | 3                       | .125     | 34                             | 2.493    |
|                    | Crick  | 2935                    | 121.330  | 332                            | 24.762   |
| 6                  | Watson | 1                       | .028     | 105                            | 7.851    |
|                    | Crick  | 1699                    | 73.789   | 279                            | 20.759   |
| 7                  | Watson | 1                       | .028     | 66                             | 4.935    |
|                    | Crick  | 745                     | 32.041   | 720                            | 53.784   |
| 8                  | Watson | 3                       | .088     | 100                            | 7.352    |
|                    | Crick  | 6262                    | 273.340  | 920                            | 68.463   |
| Control (Ingolia): |        |                         |          |                                |          |
| Rich               | Watson | 0                       | 0.00     | 65                             | 2.420    |
|                    | Crick  | 300                     | 12.598   | 849                            | 32.642   |
| Starved            | Watson | 2                       | .077     | 12                             | .449     |
|                    | Crick  | 443                     | 18.216   | 117                            | 4.517    |

## 16.2 *TIP1* CDS Read Size Distribution

Ribosome Profiling (RP)

Percentage (y-axis) versus Read Size (nt)(x-axis)

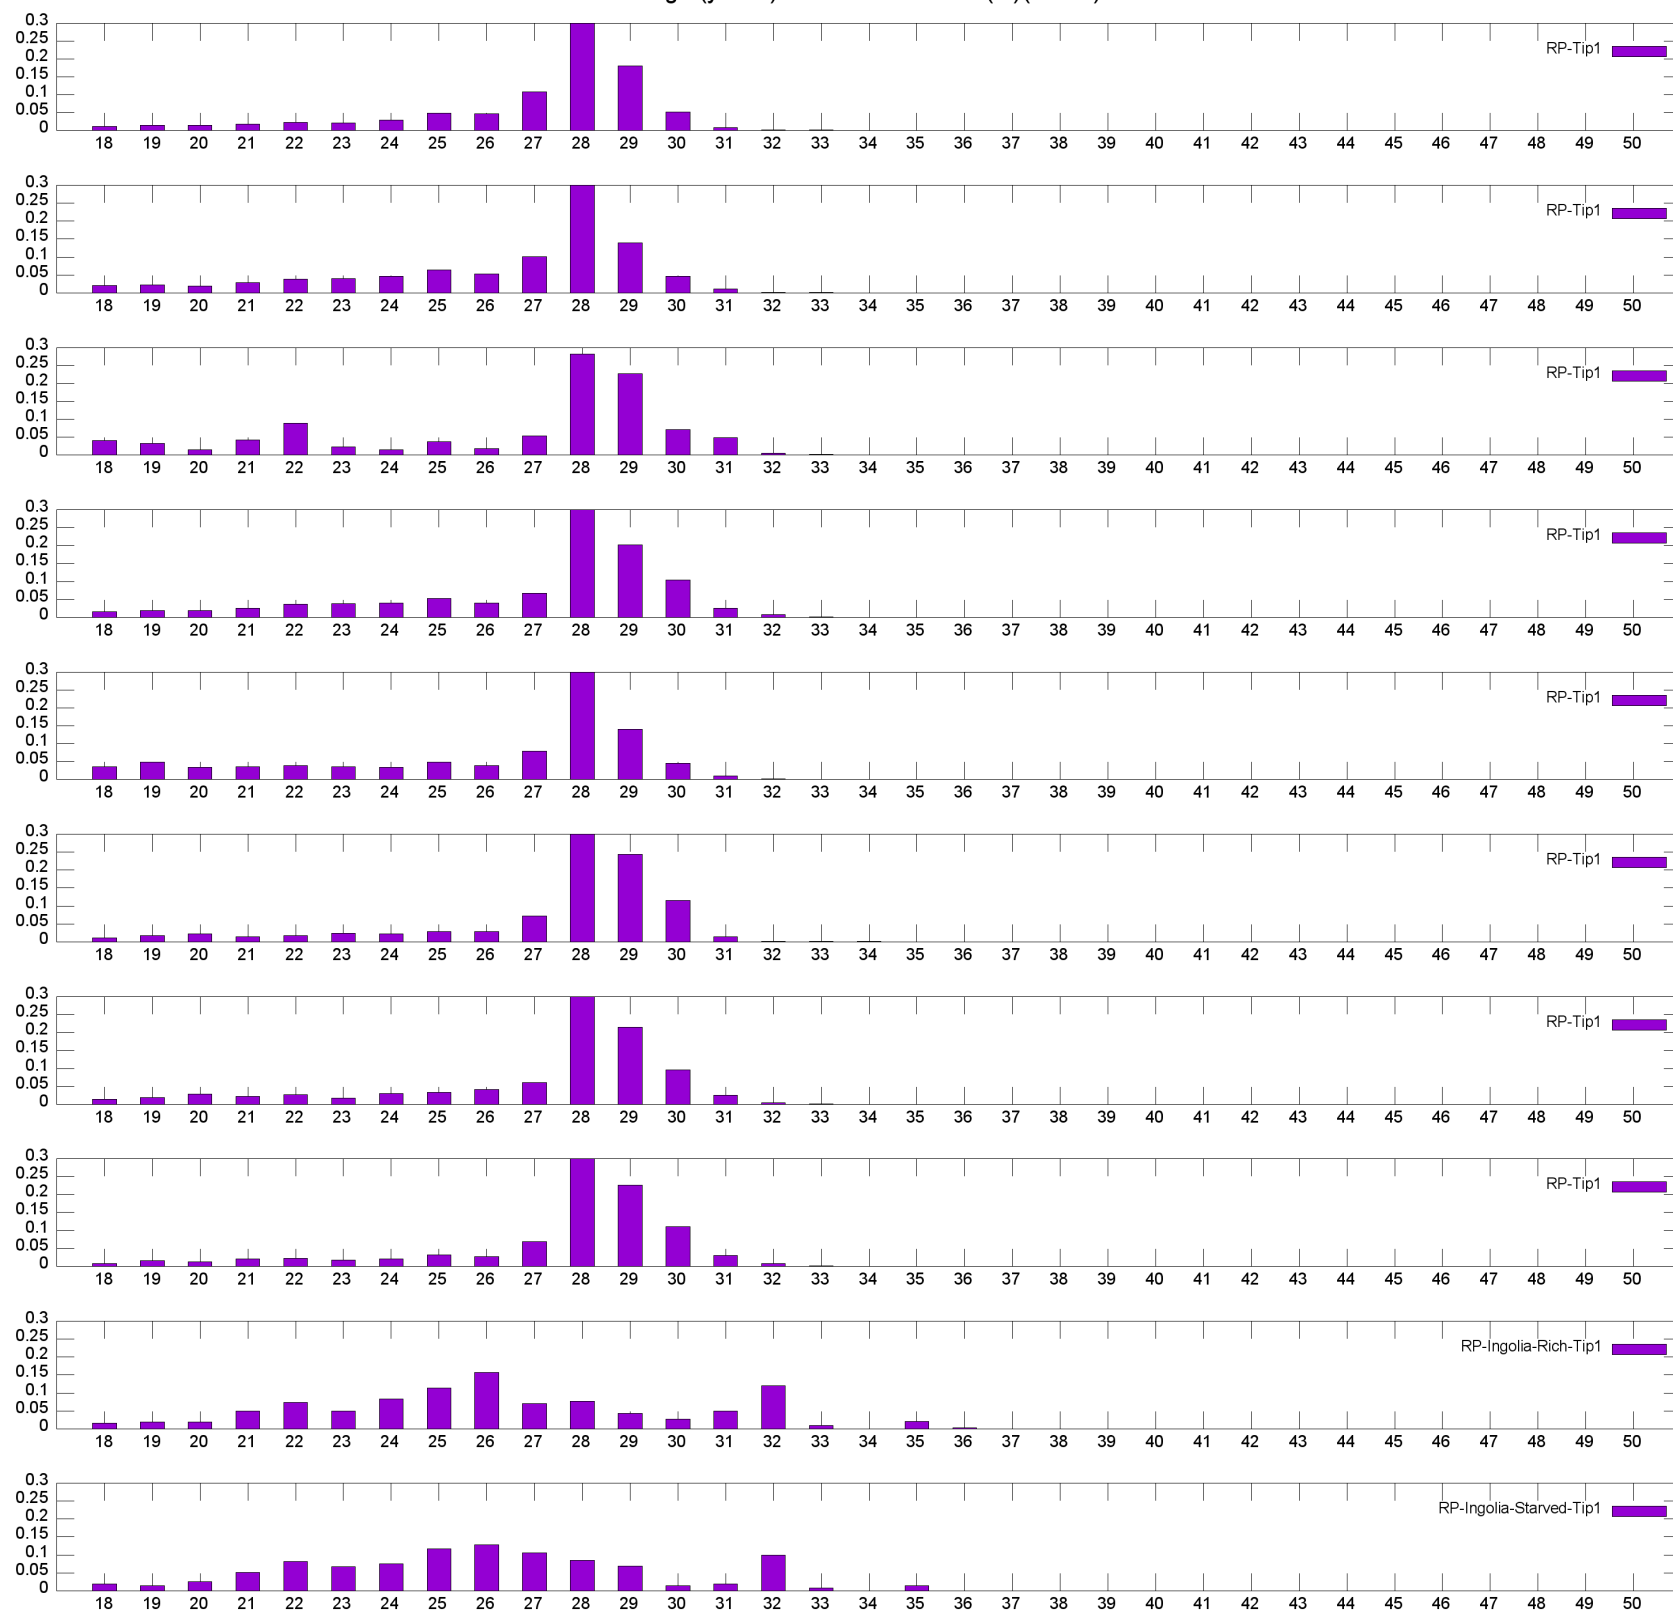

Figure 18: *TIP1* CDS Crick Reads Size Distribution (RP)

## 17 *YKR018C* (Crick Strand)

### 17.1 Table 20: RP and TP Coverage (CDS)

CDS: ChrXI:473723..475900 (2177 bp)

| Experimental:      | Strand | Ribosome Profiling (RP) |          | Transcriptional Profiling (TP) |          |
|--------------------|--------|-------------------------|----------|--------------------------------|----------|
|                    |        | Number of Reads         | Coverage | Number of Reads                | Coverage |
| 1                  | Watson | 75                      | .881     | 620                            | 13.587   |
|                    | Crick  | 594                     | 7.390    | 878                            | 18.805   |
| 2                  | Watson | 63                      | .753     | 878                            | 18.904   |
|                    | Crick  | 646                     | 7.681    | 1381                           | 28.854   |
| 3                  | Watson | 18                      | .223     | 1711                           | 37.110   |
|                    | Crick  | 176                     | 2.163    | 1767                           | 37.099   |
| 4                  | Watson | 233                     | 2.796    | 1732                           | 37.329   |
|                    | Crick  | 1351                    | 16.355   | 1457                           | 30.408   |
| 5                  | Watson | 69                      | .779     | 1837                           | 39.736   |
|                    | Crick  | 401                     | 4.709    | 1396                           | 29.395   |
| 6                  | Watson | 29                      | .355     | 1395                           | 30.112   |
|                    | Crick  | 421                     | 5.328    | 1852                           | 39.086   |
| 7                  | Watson | 45                      | .538     | 1463                           | 31.963   |
|                    | Crick  | 199                     | 2.429    | 1782                           | 38.167   |
| 8                  | Watson | 94                      | 1.186    | 845                            | 18.306   |
|                    | Crick  | 635                     | 8.126    | 897                            | 18.663   |
| Control (Ingolia): |        |                         |          |                                |          |
| Rich               | Watson | 40                      | .524     | 280                            | 3.067    |
|                    | Crick  | 127                     | 1.633    | 606                            | 6.729    |
| Starved            | Watson | 33                      | .396     | 87                             | .948     |
|                    | Crick  | 250                     | 3.091    | 385                            | 4.276    |

## 17.2 *YKR018C* CDS Read Size Distribution

Ribosome Profiling (RP)

Percentage (y-axis) versus Read Size (nt)(x-axis)

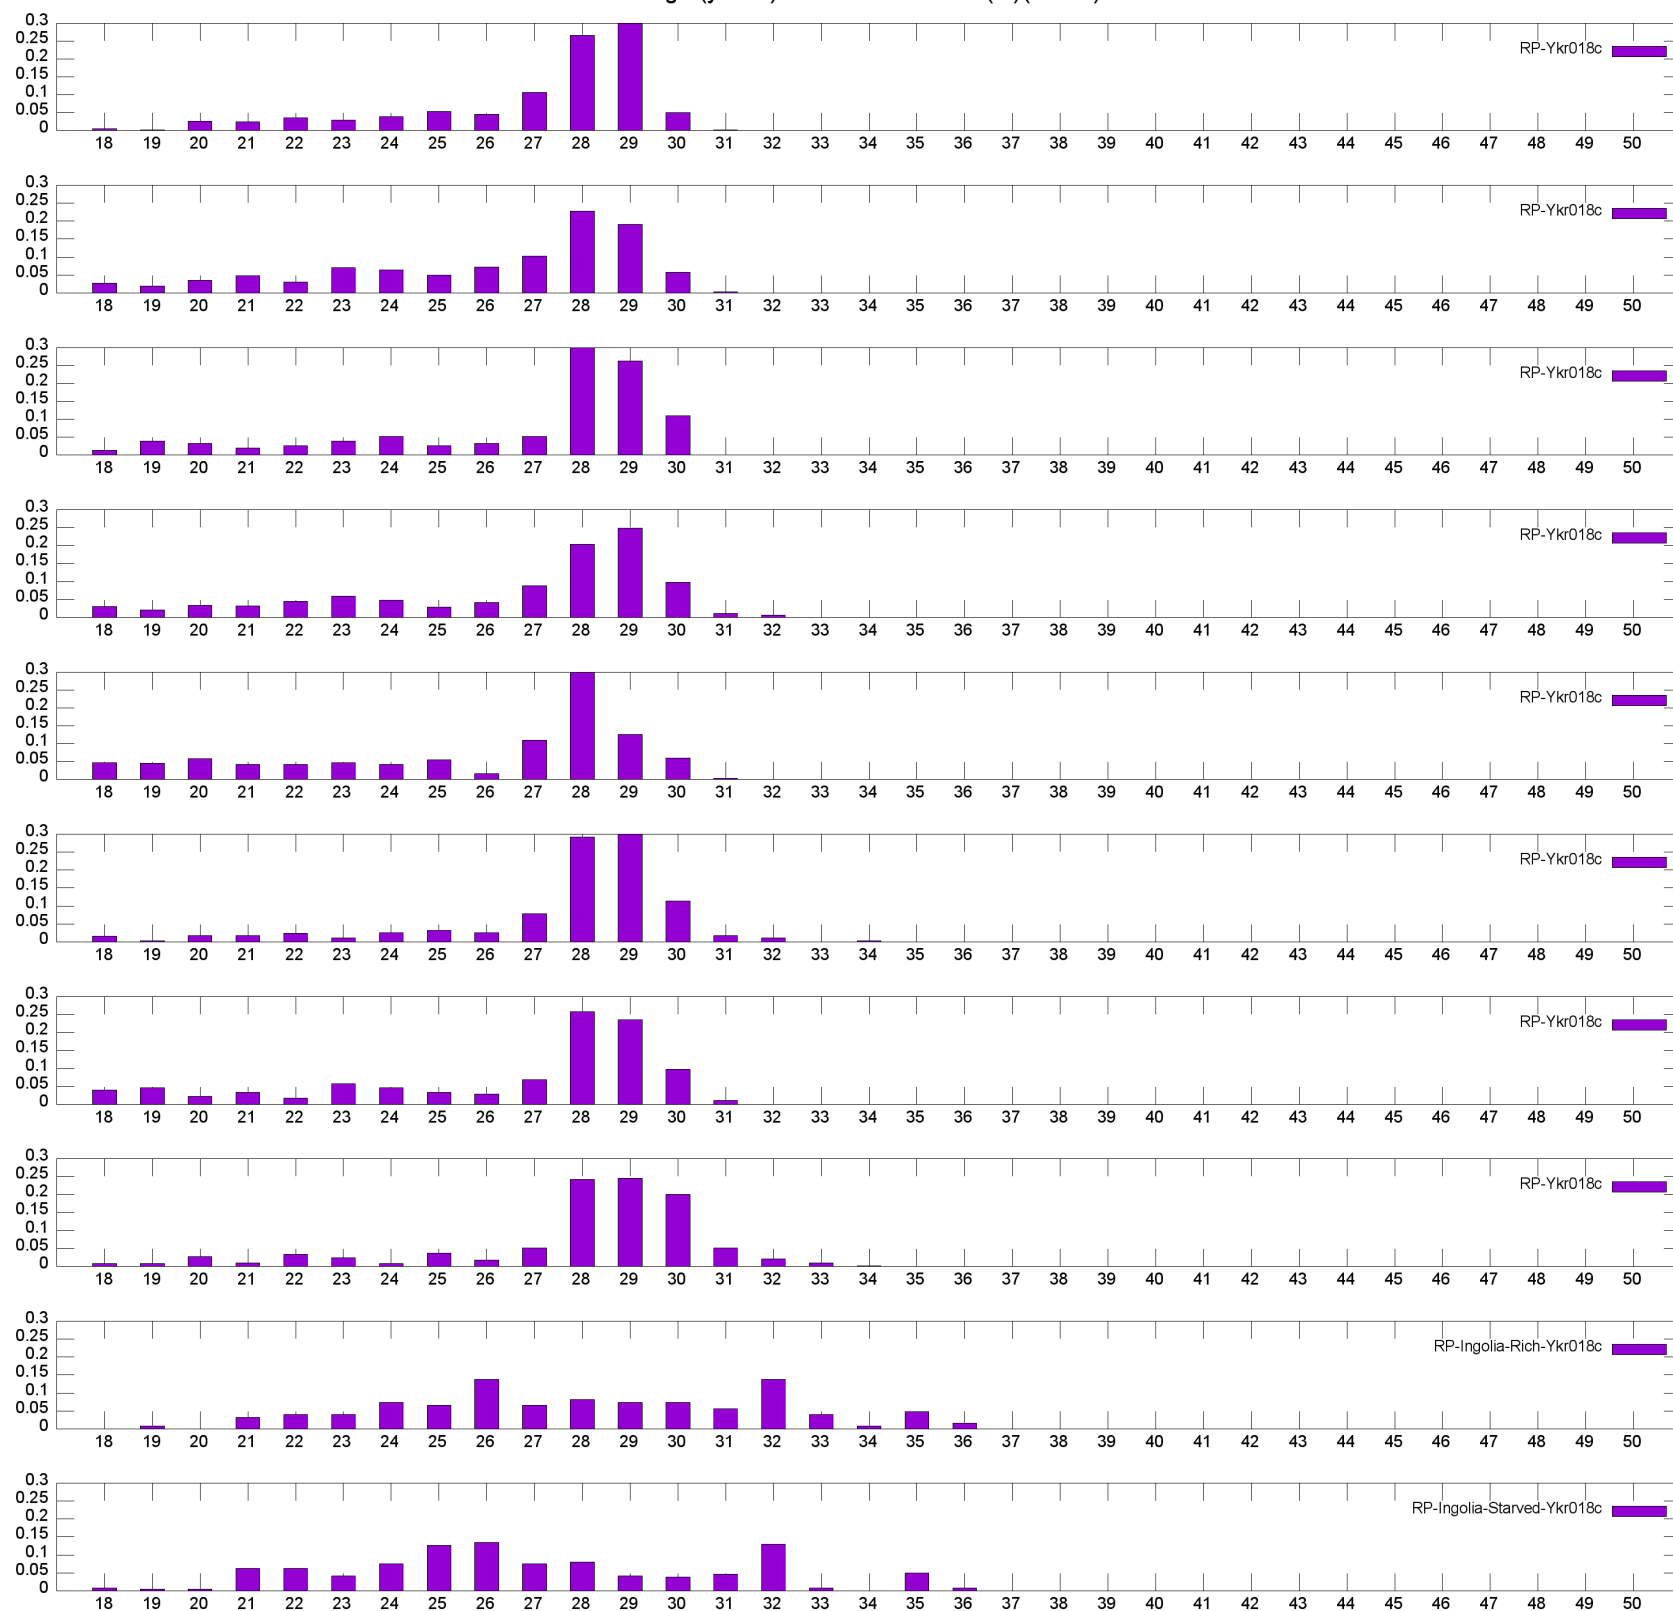

Figure 19: *YKR018C* CDS Crick Reads Size Distribution (RP)

## 18 *YRO2* (Watson Strand)

### 18.1 Table 21: RP and TP Coverage (CDS)

CDS: ChrII:343101..344135 (1034 bp)

| Experimental:      | Strand | Ribosome Profiling (RP) |          | Transcriptional Profiling (TP) |          |
|--------------------|--------|-------------------------|----------|--------------------------------|----------|
|                    |        | Number of Reads         | Coverage | Number of Reads                | Coverage |
| 1                  | Watson | 1686                    | 44.113   | 2935                           | 131.536  |
|                    | Crick  | 0                       | 0.00     | 217                            | 10.076   |
| 2                  | Watson | 1331                    | 33.912   | 6197                           | 275.793  |
|                    | Crick  | 1                       | .017     | 114                            | 5.176    |
| 3                  | Watson | 576                     | 15.059   | 6664                           | 295.917  |
|                    | Crick  | 0                       | 0.00     | 177                            | 8.049    |
| 4                  | Watson | 6928                    | 178.094  | 3635                           | 161.989  |
|                    | Crick  | 0                       | 0.00     | 138                            | 6.144    |
| 5                  | Watson | 1475                    | 36.560   | 2979                           | 134.828  |
|                    | Crick  | 0                       | 0.00     | 21                             | .968     |
| 6                  | Watson | 2703                    | 72.179   | 5884                           | 263.935  |
|                    | Crick  | 0                       | 0.00     | 109                            | 4.888    |
| 7                  | Watson | 408                     | 10.701   | 1753                           | 79.817   |
|                    | Crick  | 0                       | 0.00     | 40                             | 1.787    |
| 8                  | Watson | 2631                    | 70.811   | 1318                           | 58.019   |
|                    | Crick  | 0                       | 0.00     | 51                             | 2.333    |
| Control (Ingolia): |        |                         |          |                                |          |
| Rich               | Watson | 36                      | .879     | 116                            | 2.748    |
|                    | Crick  | 0                       | 0.00     | 50                             | 1.168    |
| Starved            | Watson | 94                      | 2.414    | 18                             | .446     |
|                    | Crick  | 2                       | .050     | 2                              | .038     |

18.2 *YRO2* CDS Read Size Distribution

Ribosome Profiling (RP)

Percentage (y-axis) versus Read Size (nt)(x-axis)

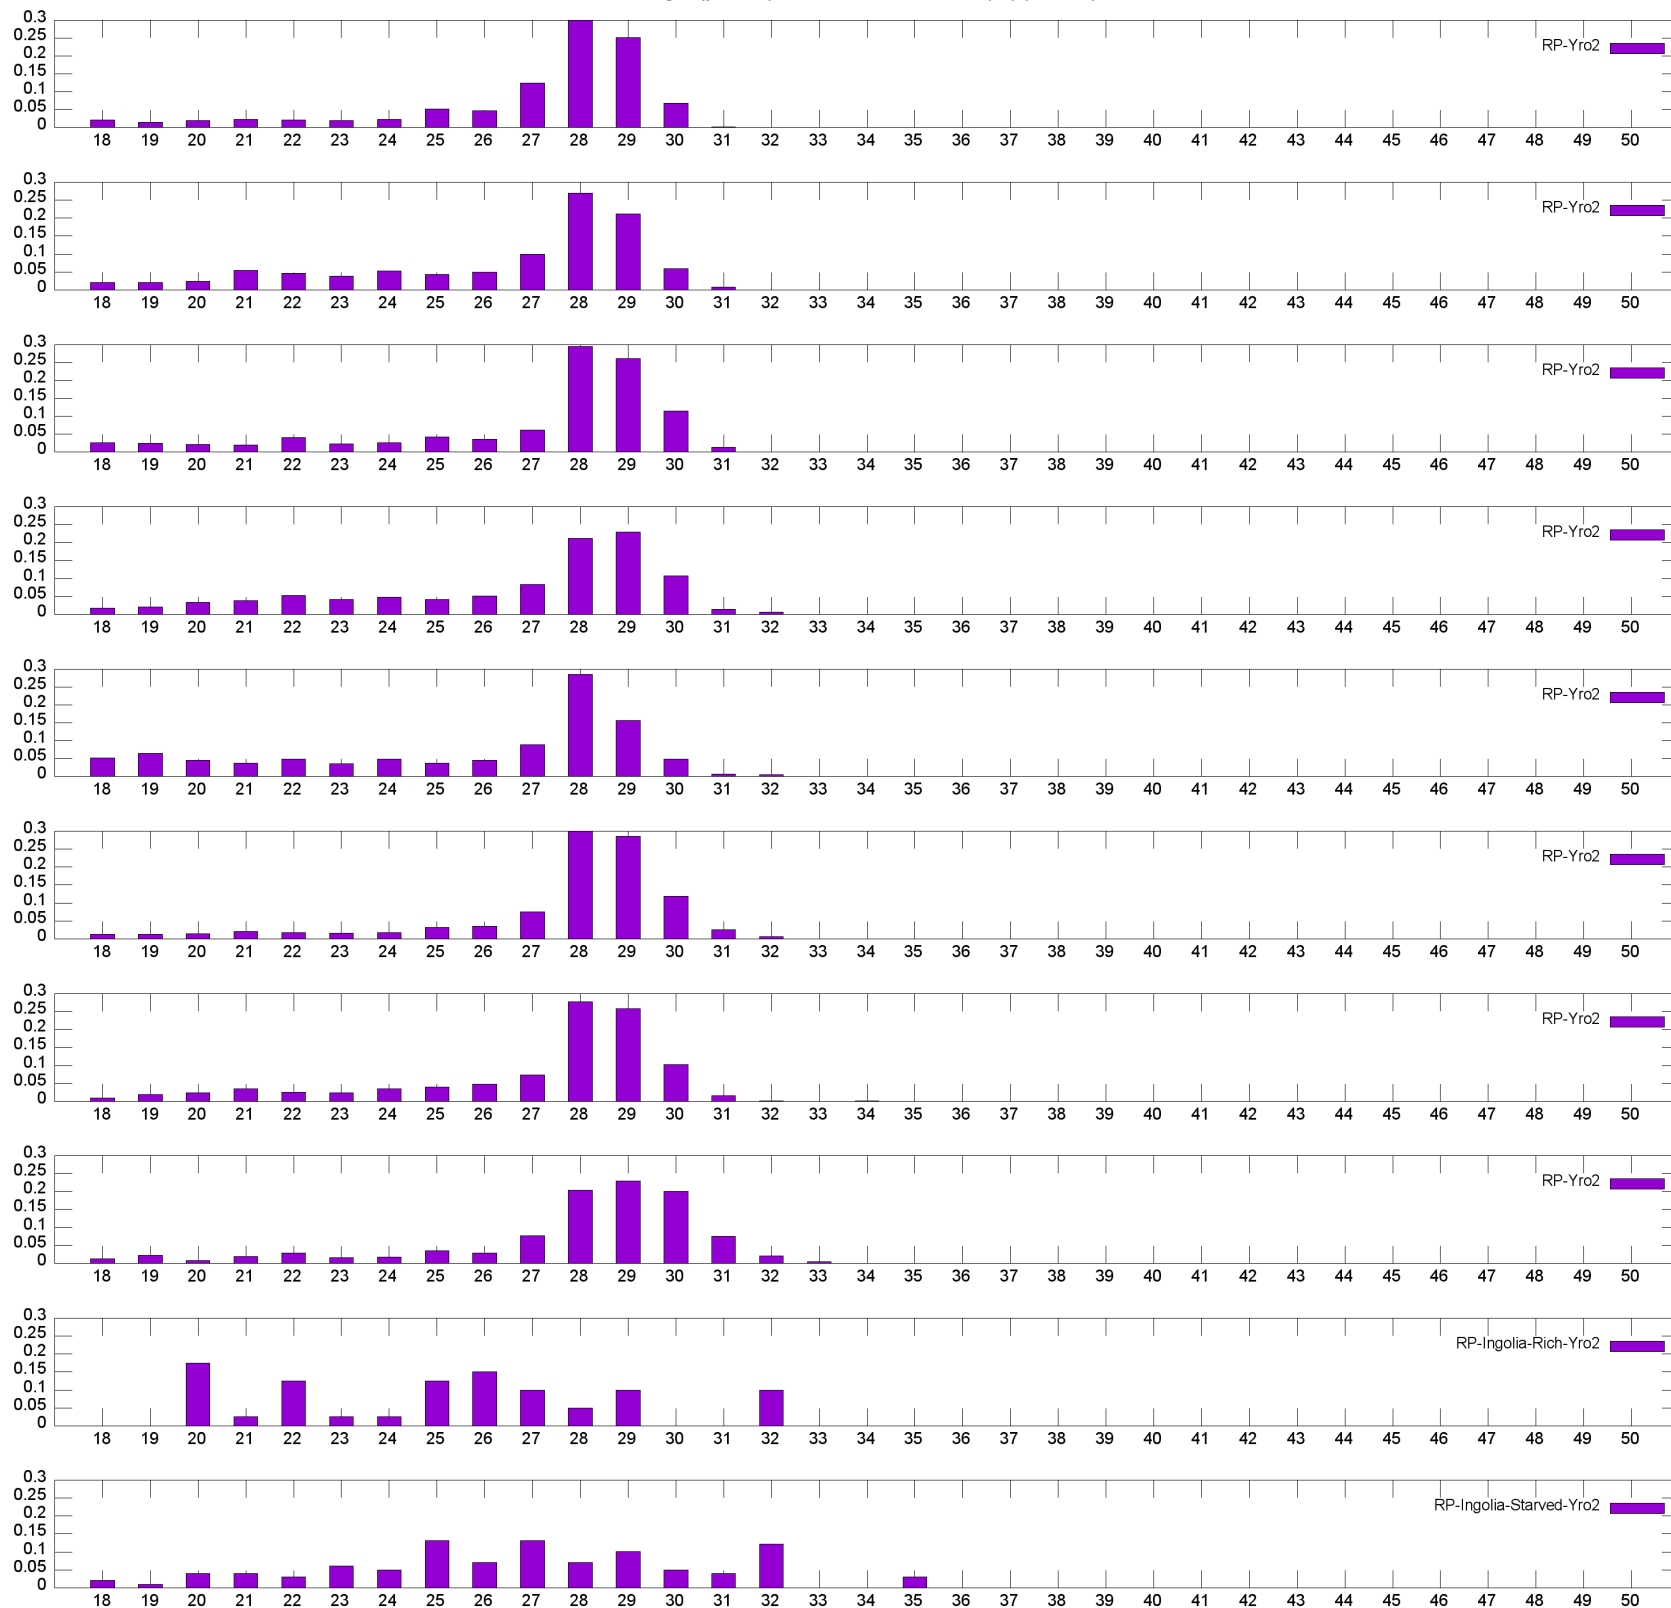Figure 20: *YRO2* CDS Watson Reads Size Distribution (RP)
