# Supplementary material
Source: PubMed Central journal article supplement (PMC5694946)

## Figure 4 SOURCE DATA

**Figure 4A.** Source data used in quantification of Acc1p levels through a synchronous cell cycle.

\*Acc1p experiments (2 data sets) were recorded on film.

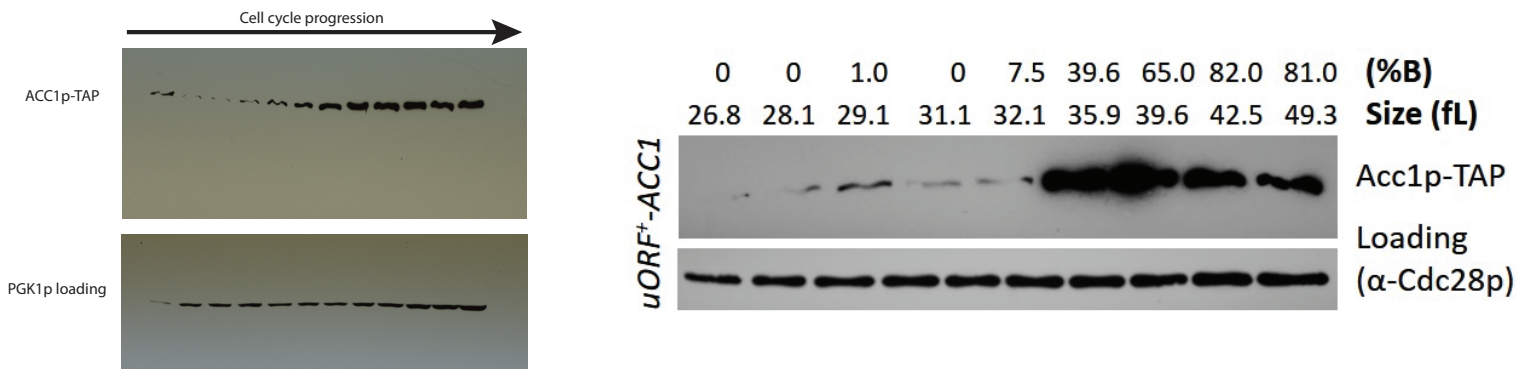

**Figure 4B.** Source data used in quantification of Fas1p levels through a synchronous cell cycle.

Fas1p experiments (2 data sets) were digitally recorded. Left (darker) image is an overlay of the blot with chemiluminescent signal shown for informational purposes only. The image to the right (lighter) is the raw image used for quantification.

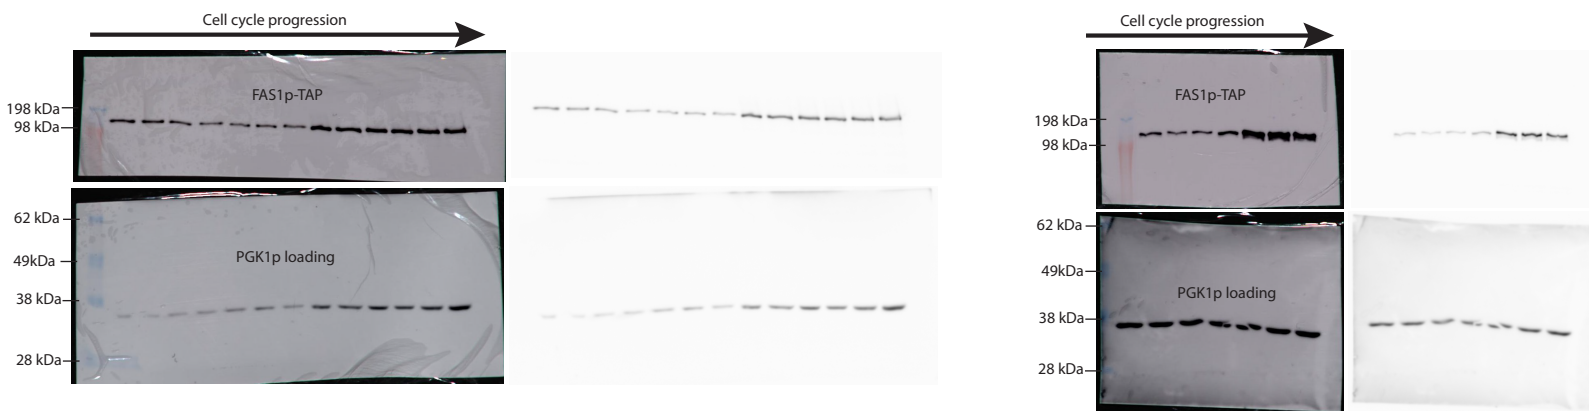

**Figure 4C.** Source data used in quantification of Fas2p levels through a synchronous cell cycle.

Fas2p experiments (4 data sets) were digitally recorded. Left (darker) image is an overlay of the blot with chemiluminescent signal shown for informational purposes only. The image to the right (lighter) is the raw image used for quantification.

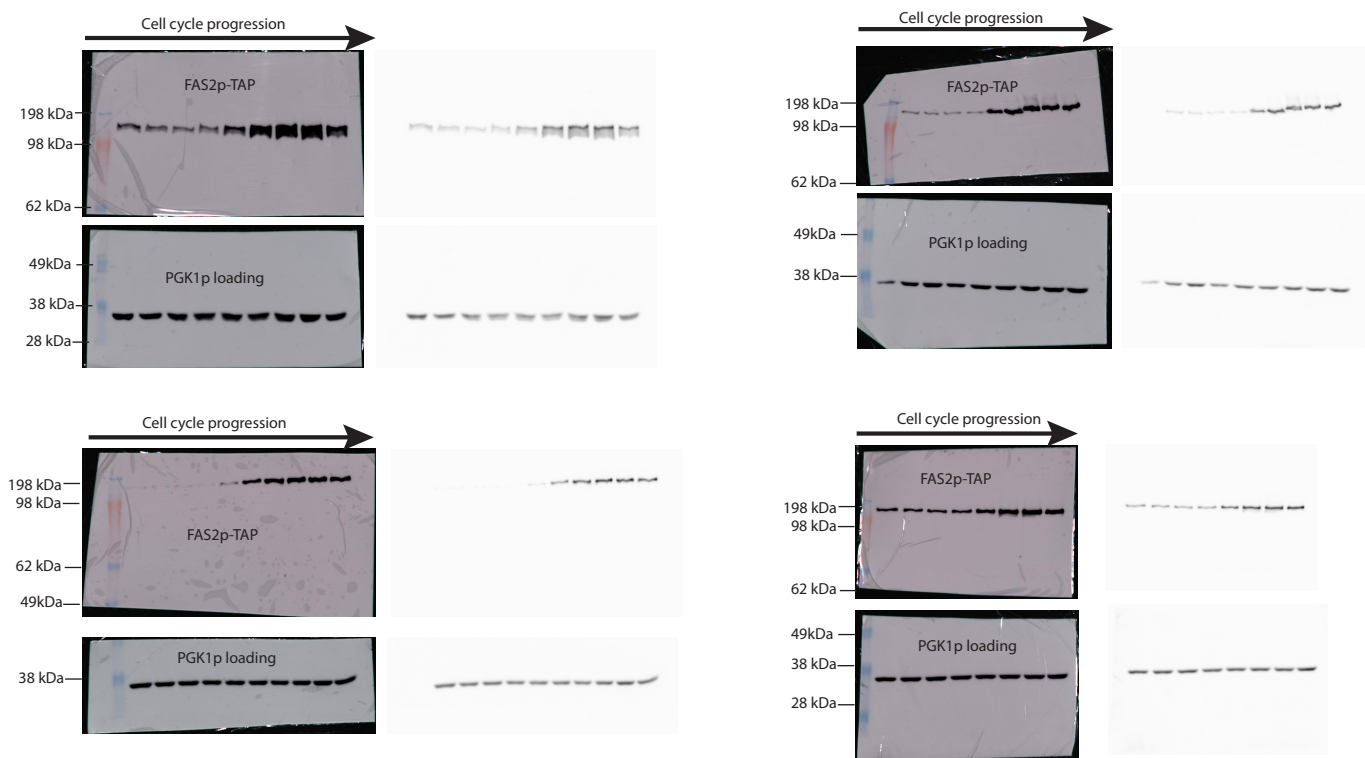

Supplement: EMBJ-36-487-s005.pdf [file EMBJ-36-487-s005.pdf]
