# Supplementary material
Source: PubMed Central journal article supplement (PMC5694946)

## Figure 5 SOURCE DATA

**Figure 5B.** Source data used in quantification of uORFm Acc1p levels (3 sets) through a synchronous cell cycle. 1 set was recored on film, and 2 data sets were digitally recorded. For the digital images, the left (darker) image is an overlay of the blot with chemiluminescent signal shown for informational purposes only. The image to the right (lighter) is the raw image used for quantification.

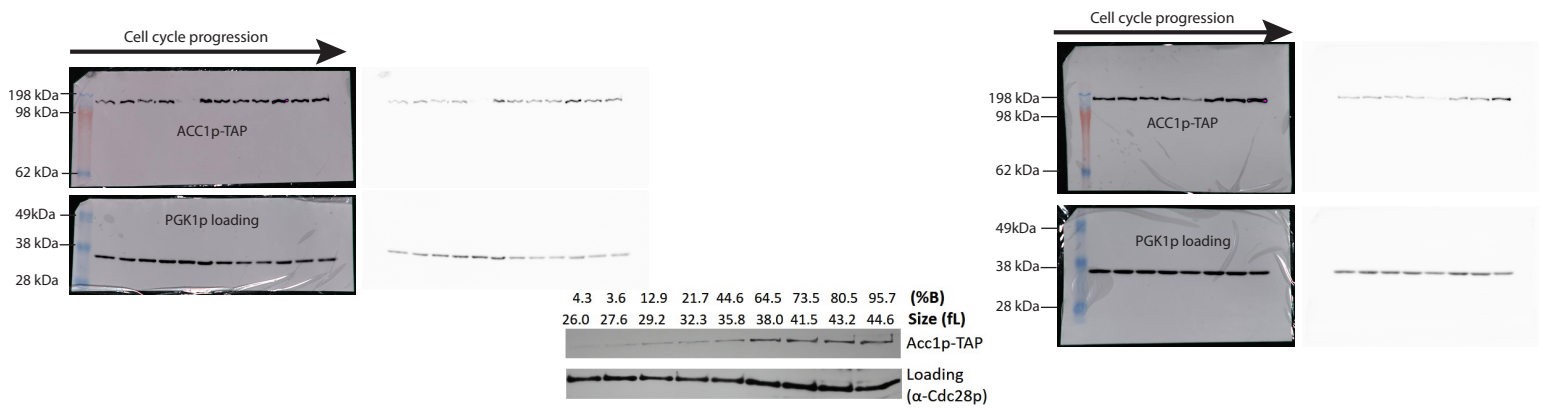

**Figure 5C, 5D.** Source data (4 sets) used in quantification of Acc1p protein and mRNA levels. Sets are grouped by rows with descriptions at the top of each column.

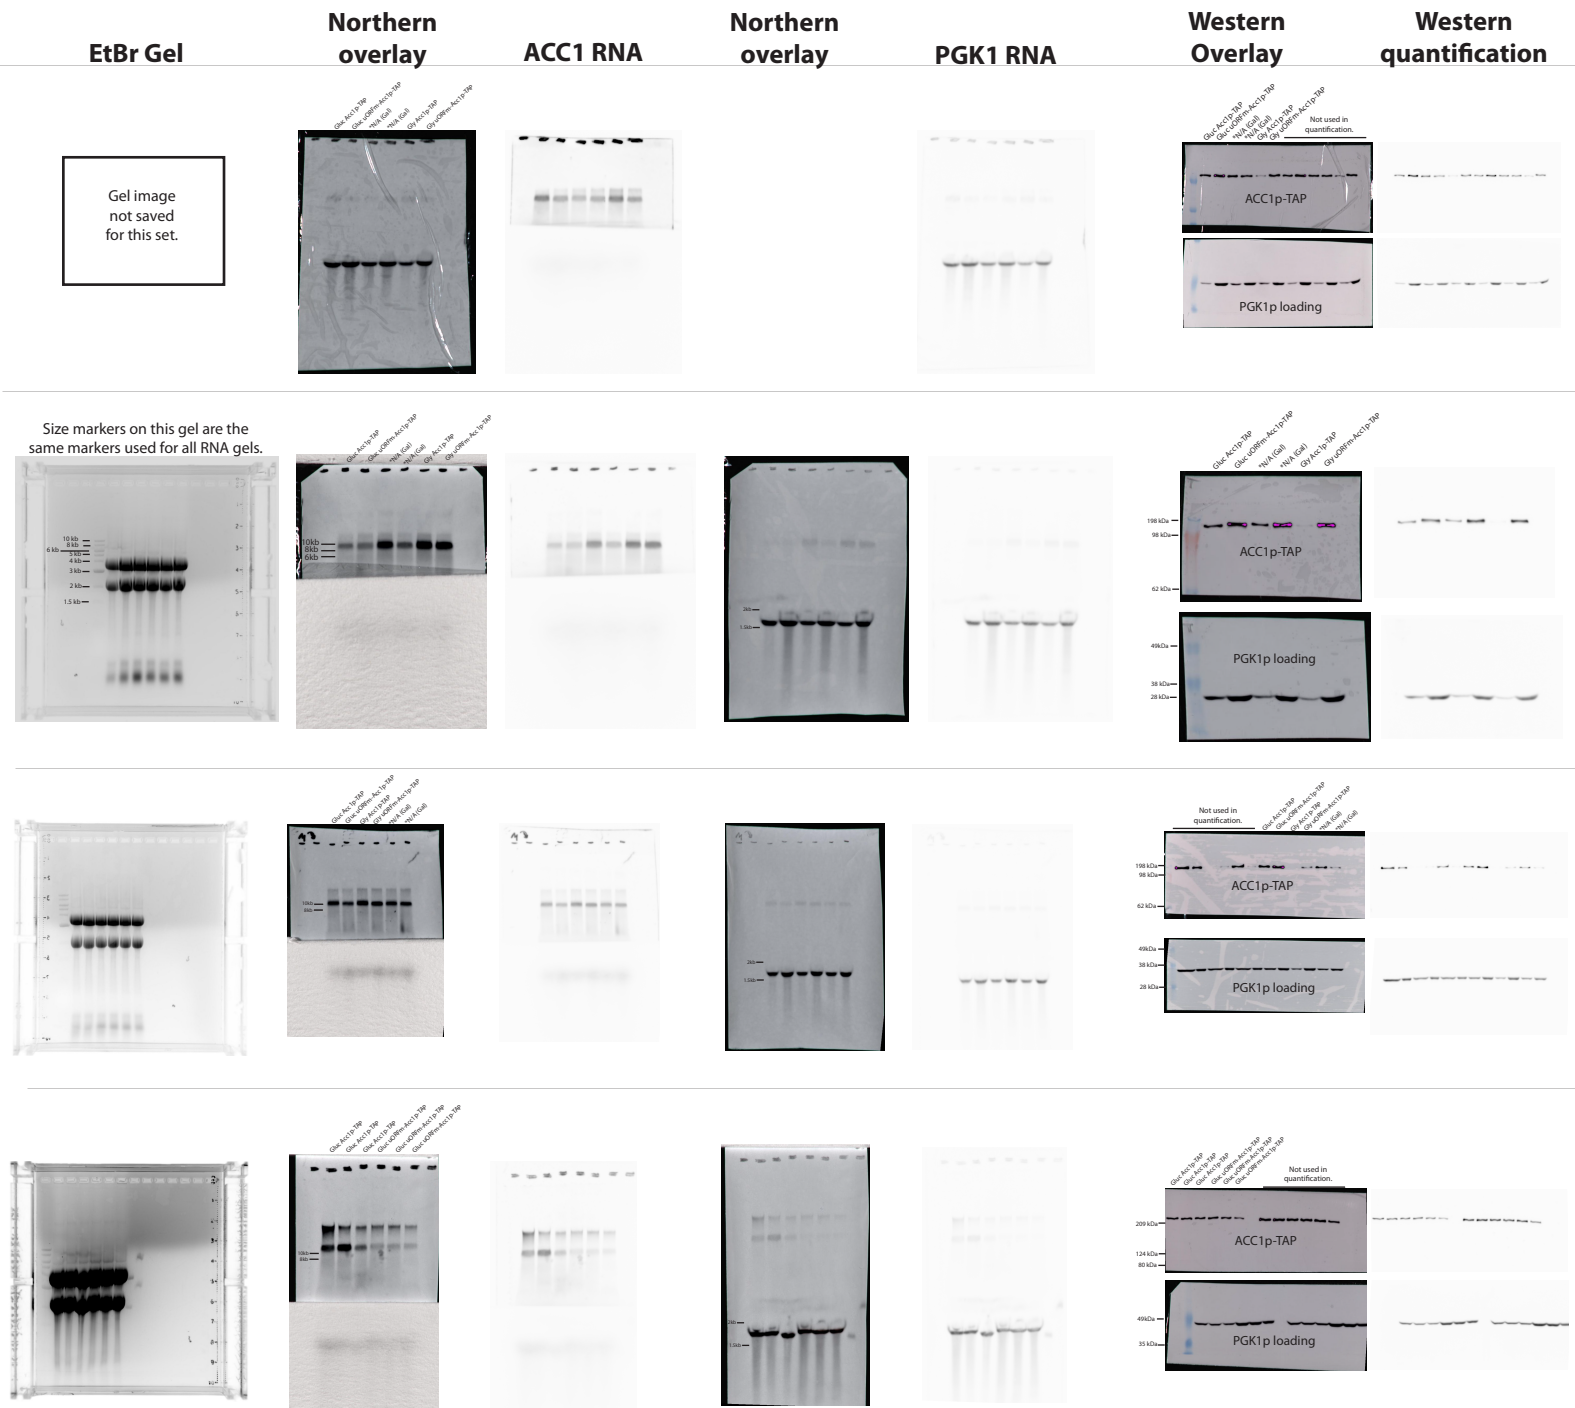

Supplement: EMBJ-36-487-s006.pdf [file EMBJ-36-487-s006.pdf]
